# Supplementary material for: The impact of decentralising colposcopy services from tertiary-level to primary-level care in inner-city Johannesburg, South Africa: a before and after study
Source: PubMed Central journal article supplement — BMJ Open. 2019 Mar 30;9(3):e024726. doi: 10.1136/bmjopen-2018-024726 (PMC6475219; doi:10.1136/bmjopen-2018-024726), 2019-03-30
Supplement: bmjopen-2018-024726.draft_revisions.pdf [file bmjopen-2018-024726.draft_revisions.pdf]

# BMJ Open

BMJ Open is committed to open peer review. As part of this commitment we make the peer review history of every article we publish publicly available.

When an article is published we post the peer reviewers' comments and the authors' responses online. We also post the versions of the paper that were used during peer review. These are the versions that the peer review comments apply to.

The versions of the paper that follow are the versions that were submitted during the peer review process. They are not the versions of record or the final published versions. They should not be cited or distributed as the published version of this manuscript.

BMJ Open is an open access journal and the full, final, typeset and author-corrected version of record of the manuscript is available on our site with no access controls, subscription charges or pay-per-view fees (<http://bmjopen.bmj.com>).

If you have any questions on BMJ Open's open peer review process please email [info.bmjopen@bmj.com](mailto:info.bmjopen@bmj.com)

# BMJ Open

## The impact of decentralising colposcopy services from a busy tertiary hospital to a primary care clinic in inner-city Johannesburg, South Africa

|                               |                                                                                                                                                                                                                                                                                                                                                                                                                                                                                                                                                                                                                                                                                                                                                                                                                                                                                                                                                                                                                             |
|-------------------------------|-----------------------------------------------------------------------------------------------------------------------------------------------------------------------------------------------------------------------------------------------------------------------------------------------------------------------------------------------------------------------------------------------------------------------------------------------------------------------------------------------------------------------------------------------------------------------------------------------------------------------------------------------------------------------------------------------------------------------------------------------------------------------------------------------------------------------------------------------------------------------------------------------------------------------------------------------------------------------------------------------------------------------------|
| Journal:                      | <i>BMJ Open</i>                                                                                                                                                                                                                                                                                                                                                                                                                                                                                                                                                                                                                                                                                                                                                                                                                                                                                                                                                                                                             |
| Manuscript ID                 | bmjopen-2018-024726                                                                                                                                                                                                                                                                                                                                                                                                                                                                                                                                                                                                                                                                                                                                                                                                                                                                                                                                                                                                         |
| Article Type:                 | Research                                                                                                                                                                                                                                                                                                                                                                                                                                                                                                                                                                                                                                                                                                                                                                                                                                                                                                                                                                                                                    |
| Date Submitted by the Author: | 15-Jun-2018                                                                                                                                                                                                                                                                                                                                                                                                                                                                                                                                                                                                                                                                                                                                                                                                                                                                                                                                                                                                                 |
| Complete List of Authors:     | Maimela, Gloria; University of the Witwatersrand, Wits Reproductive Health and HIV Institute, Faculty of Health Sciences<br>Nene, Xolisile; University of the Witwatersrand , Wits Reproductive Health and HIV Institute, Faculty of Health Sciences<br>Mvundla, Nontuthuko; University of the Witwatersrand , Wits Reproductive Health and HIV Institute, Faculty of Health Sciences<br>Sawry, Shobna; University of the Witwatersrand , Wits Reproductive Health and HIV Institute, Faculty of Health Sciences<br>Smith, Trudy; University of the Witwatersrand , Wits Donald Gordon Medical Centre, Faculty of Health Sciences<br>Rees, Helen; University of the Witwatersrand , Wits Reproductive Health and HIV Institute, Faculty of Health Sciences<br>Kachingwe, Elizabeth; University of the Witwatersrand , Wits Reproductive Health and HIV Institute, Faculty of Health Sciences<br>Chersich, Matthew; University of the Witwatersrand , Wits Reproductive Health and HIV Institute, Faculty of Health Sciences |
| Keywords:                     | Colposcopy < GYNAECOLOGY, Community gynaecology < GYNAECOLOGY, Gynaecological oncology < GYNAECOLOGY, Minimally invasive surgery < GYNAECOLOGY                                                                                                                                                                                                                                                                                                                                                                                                                                                                                                                                                                                                                                                                                                                                                                                                                                                                              |
|                               |                                                                                                                                                                                                                                                                                                                                                                                                                                                                                                                                                                                                                                                                                                                                                                                                                                                                                                                                                                                                                             |

SCHOLARONE™  
Manuscripts

1  
2  
3 **Title:** The impact of decentralising colposcopy services from a busy tertiary hospital to a  
4 primary care clinic in inner-city Johannesburg, South Africa  
5

6  
7 **Authors:** G. Maimela\*<sup>1</sup>, X. Nene\*<sup>1</sup>, N. Mvundla<sup>1</sup>, S. Sawry<sup>1</sup>, T. Smith<sup>2</sup>, H. Rees<sup>1</sup>,  
8 E.Kachingwe<sup>1</sup>, M. Chersich<sup>1</sup>  
9

10  
11 **Affiliations:**  
12

- 13 1. Wits Reproductive Health and HIV Institute, Faculty of Health Science, University of  
14 the Witwatersrand, South Africa  
15
- 16 2. Department of Obstetrics and Gynaecology, School of Clinical Medicine, Charlotte  
17 Maxeke Johannesburg Academic Hospital, Faculty of Health Science, University of  
18 the Witwatersrand, South Africa  
19  
20  
21

22  
23 **Corresponding author:** Gloria Maimela, [GMaimela@wrhi.ac.za](mailto:GMaimela@wrhi.ac.za), Wits Reproductive Health  
24 and HIV Institute, Faculty of Health Sciences, University of the Witwatersrand, South Africa  
25  
26  
27  
28  
29  
30  
31  
32  
33  
34  
35  
36  
37  
38  
39  
40  
41  
42  
43  
44  
45  
46  
47  
48  
49  
50  
51  
52  
53  
54  
55  
56  
57  
58  
59  
60

1  
2  
3 **Abstract (max 300 words)**  
4

5 **Objective:** To assess whether decentralising colposcopy services to a primary care facility in  
6 inner-city Johannesburg, South Africa raises access to colposcopy.  
7

8  
9 **Design:** Before-after study comparing two years before and two after decentralisation, using  
10 clinical records, and laboratory data on cervical cytology and histology.  
11

12  
13 **Primary outcome:** The proportion of all women attending HCHC with an abnormal Pap  
14 smear who had a colposcopy post-decentralisation.  
15

16  
17 **Setting:** Charlotte Maxeke Johannesburg Academic Hospital (CMJAH) has provided  
18 colposcopy services for several decades. The Hillbrow Community Health Centre (HCHC),  
19 located about 3km away, began colposcopy services in 2014.  
20  
21

22  
23 **Participants:** Women, aged above 18 years, who had a colposcopy for diagnosis and  
24 treatment of precancerous cervical lesions following a Pap smear, from 2012-2016 at  
25 CMJAH or HCHC.  
26  
27

28  
29 **Results:** Pre-decentralisation at CMJAH, 910 women had colposcopy (2012-2014). Post-  
30 decentralisation (2014-2016), 721 had colposcopy at CMJAH and 399 at HCHC, the  
31 decentralised facility. The number who had a Pap smear at HCHC and then a colposcopy  
32 rose three-fold post-decentralisation (114 versus 350). Post-decentralisation, 43 women at  
33 HCHC were referred from to CMJAH for colposcopy, compared to 114 pre-decentralisation.  
34 Post-decentralisation, 47.3% of women at CMJAH waited >6 months for colposcopy, while  
35 35.5% did at HCHC ( $p < 0.001$ ). Across all three groups, 26.9-30.3% of women had CIN III  
36 lesions or carcinoma on colposcopy. The proportion of invalid specimens was similar at  
37 CMJAH and HCHC (1.8-2.8%). Of 401 women who had an abnormal Pap smear at HCHC post-  
38 decentralisation, 267 had colposcopy (66.6%).  
39  
40  
41  
42  
43  
44  
45

46  
47 **Conclusion:** Decentralisation can decrease the time to colposcopy and reduce the workload  
48 of tertiary hospitals. Overall, more women accessed services. Colposcopy coverage at HCHC  
49 is higher than other sites, but could be further improved. Decentralisation did not appear to  
50 affect the quality of services and this model could be extended to similar settings in South  
51 Africa and elsewhere.  
52  
53

54  
55 **Key words:** South Africa, colposcopy, cervical cancer, primary health care, decentralisation  
56  
57

## Article Summary

### Strengths and limitations of this study

- Data were collected for the purposes of patient care, and not specifically for research, potentially reducing data quality.
- The limited data collected meant that the study could not fully investigate several important questions, such as reasons for delays in colposcopy, and whether these delays relate to limited human resources for performing colposcopy or deficiencies in laboratory capacity, for example.
- Given that the study only covered the first two years after decentralisation, we are unable to ascertain the intervention's sustainability in the long-run.
- The study strengths include a relatively large number of women in all study groups, allowing us to detect differences between the time periods

## Introduction

Though cervical cancer is a largely preventable disease, it is the second most common cancer among women aged 15 to 44 years in the world (1). In South Africa, it is the commonest cancer in that age group, and mortality rates are high (2, 3). About 3% of women in South Africa harbour cervical human papilloma virus (HPV)-16/18, which is responsible for the majority of cases of cervical cancer in the country (3). Rates of cervical cancer in South Africa can partly be attributed to the high HIV prevalence rate (4). Women with HIV infection have a seven fold higher rate of persistence of high-risk HPV compared to HIV uninfected women (5), heightening their risk for incident and progressive precancerous lesions. While antiretroviral therapy reduces the risk of cervical cancer and its precursors, the risk remains much higher than for HIV-negative women (6).

Cervical screening is used for the early identification and treatment of pre-cancerous lesions of the cervix. Screening methods include HPV screening, visual inspection with acetic acid, or cytology through Papanicolaou (Pap) smear, with referral of atypical findings for colposcopy to establish a definitive diagnosis. During colposcopy, the view of the cervix is magnified and, where required, a biopsy is taken or a large loop excision of the transformation zone (LLETZ) is conducted. WHO recommends that women who are older than 30 years have repeat cervical cancer screening every 3-5 years, and more frequently if HIV infected (7).

A range of health systems and patient factors influence access to colposcopy. System barriers include a limited number of colposcopy services, which are mostly centralised within tertiary-level facilities, with long waiting times for patients and few opportunities for non-specialist health workers to develop requisite skills (8). There are limited numbers of specialist gynaecologists within the public sector, and the high demands on these doctors for emergency and curative obstetric and gynaecology services may reduce the time available for diagnostic or preventive interventions, such as colposcopy. Another key factor is the complexity of providing Pap and other results to patients and then scheduling colposcopy appointments across the disjointed systems that often exist between a tertiary hospital and primary care centres (9-11). Patient-related factors linked with low uptake of colposcopy include low education levels, being single, fear of HIV testing and disclosure, a low CD4 count in HIV-infected women and transport costs for the additional visits (10, 12,

1  
2  
3 13). Patient demand for colposcopy is also undermined by a general fear of cancer, and lack  
4 of awareness or knowledge about cervical cancer (9, 14). Poor patient-provider interactions  
5 restrict access, whilst a longstanding relationship with a primary clinician can optimise  
6 uptake (14).  
7  
8  
9

10 In South Africa, patients who require colposcopy are generally referred to a tertiary-level  
11 facility where the procedure is rendered by specialist gynaecology oncologists and trainee  
12 gynaecologists under supervision. While there may be benefits to decentralising colposcopy  
13 services to lower levels of care, these need to be balanced by the advantages of  
14 centralization of cancer services, such as concentrating clinical expertise, with a higher  
15 quality of care, and the rationalisation of expensive specialist equipment. Thus, in this  
16 before- and after-study, we assessed whether access to colposcopy would be raised by  
17 decentralising colposcopy services from a tertiary-level hospital to a primary care facility in  
18 inner-city Johannesburg, South Africa.  
19  
20  
21  
22  
23  
24  
25

## 26 **Methods**

### 27 **Study participants and setting**

28  
29  
30 Women, aged 18 years and older, who accessed colposcopy services at either Charlotte  
31 Maxeke Johannesburg Academic Hospital (CMJAH) or Hillbrow Community Health Centre  
32 (HCHC) between October 2012 and September 2016 were included in the study. Both  
33 facilities are in sub-district F of the Johannesburg Health District (JHD).  
34  
35  
36  
37

38 The Colposcopy clinic at CMJAH is part of the Gynaecology-Oncology Department at CMJAH,  
39 which has two colposcopy machines operated by specialist gynaecology-oncologists.

40 Women attending a facility in JHD who have an abnormal Pap smear are referred to the  
41 facility, where they are provided with an appointment date for colposcopy.  
42  
43  
44

45 Hillbrow Community Health Centre (HCHC) is situated in the densely populated inner-city  
46 area of Hillbrow, about 3km from CMJAH. HCHC provides primary level care, including a 24  
47 hour casualty and a midwife obstetrics unit. The facility is run predominantly by nursing  
48 staff, with support from non-specialist medical doctors.  
49  
50  
51  
52

### 53 **Implementation of decentralised services**

54  
55  
56  
57  
58  
59  
60

1  
2  
3 In 2013, a review of patient files at HCHC found that a large proportion of women attending  
4 the HIV clinic had high-risk lesions on Pap smear (15). Moreover, there were some reports  
5 from patients and health workers at HCHC of prolonged waiting times for colposcopy  
6 services at CMJAH. The Wits Reproductive Health and HIV Institute (Wits RHI) thus set about  
7 establishing colposcopy services at the facility. A private sector company donated a  
8 colposcopy machine. Two district medical officers were trained by specialist gynaecology  
9 oncologists at CMJAH to provide the service. CMJAH staff provided ongoing support and  
10 established referral processes between the two facilities. The services, which began in  
11 October 2014, were provided twice a week by the medical officers, with assistance from the  
12 nurse who takes Pap smears at the facility. Patients attending HCHC and some surrounding  
13 clinics were given an appointment for colposcopy if they had an abnormal Pap smear result,  
14 defined as: high-grade squamous intraepithelial lesion (HSIL), atypical squamous cell and  
15 HSIL cannot be excluded (ASC-H), or squamous cell carcinoma (SCC) (16). A few patients  
16 with Pap smear results other than those defined as abnormal smears were also referred for  
17 colposcopy. Patients with complex lesions, such as abnormal cervical anatomy or a high  
18 suspicion of cancer on Pap smear were referred to CMJAH, as were those with a failed  
19 colposcopy. Colposcopy procedures included visual inspection only, or visual inspection  
20 together with either a Lletz or biopsy. After colposcopy, patients were given a date to return  
21 for results, where decisions on further tests and clinical management were made. Histology  
22 specimens from both sites were processed at the National Health Laboratory Service (NHLS).

### 37 38 **Data sources and collection**

39  
40 For the purpose of this evaluation, women who accessed colposcopy services at CMJAH and  
41 HCHC were divided into three groups, according to when and where colposcopy took place:  
42 1) pre-decentralisation at CMJAH between October 2012 and September 2014; 2) post-  
43 decentralisation at CMJAH between October 2014 and September 2016; and 3) post-  
44 decentralisation at HCHC between October 2014 and September 2016.

45  
46 At CMJAH, we extracted data from paper-based records at the colposcopy clinic, including  
47 on patients' age, HIV status, antiretroviral treatment, date of Pap smear, Pap smear result,  
48 date of colposcopy, colposcopy procedure performed and histology results. Data were  
49 entered into a REDCap electronic database (REDCap Software, Version 4.14.5, Vanderbilt  
50 University) (17). At HCHC, demographic and clinical data on women who accessed  
51  
52  
53  
54  
55  
56  
57  
58  
59  
60



1  
2  
3 colposcopy services were entered into an MS Excel spreadsheet after each patient visit.  
4 Data were also obtained from the NHLS on Pap smear cytology for women attending HCHC  
5 who had a Pap smear and for the whole JHD.  
6  
7

### 8 **Study variables and statistical analysis**

9  
10 Patient characteristics and colposcopy procedures were compared between HCHC and  
11 CMJAH post-decentralisation, and within CMJAH before and after decentralisation. Time to  
12 colposcopy was calculated as the number of months from date of Pap smear to colposcopy  
13 and was categorised as optimal (under 3 months), acceptable (3-6 months) and delayed  
14 (greater than 6 months). Histology results were classified as normal (includes benign  
15 endocervical polyp, atrophic ectocervical mucosa, koilocytosis and metaplasia), Cervical  
16 Intraepithelial Neoplasia (CIN) I, CIN II, CIN III, carcinoma, other (includes infections such as  
17 cervicitis, inflammation and dysplasia) and invalid specimens (includes absent results). The  
18 coverage of colposcopy services at HCHC, the primary outcome, was estimated by  
19 calculating the proportion of all women at HCHC with an abnormal Pap smear who had a  
20 colposcopy.  
21  
22  
23  
24  
25  
26  
27  
28

29  
30 Data were presented as proportions, medians and inter-quartile ranges, and differences  
31 between groups were assessed using a chi-square test or a Wilcoxon rank-sum test, as  
32 appropriate. All data were analysed using STATA version 13.0.  
33  
34  
35

### 36 **Ethical considerations**

37  
38 Ethical approval was obtained from Human Research Ethics Committee of the University of  
39 the Witwatersrand (Certificate number: M151184). Permission for use of the CMJAH data  
40 was granted by the hospital's Chief Executive Officer and the head of the Department of  
41 Obstetrics and Gynaecology at CMJAH. The NHLS Academic Affairs and Research Office gave  
42 permission for use of their data.  
43  
44  
45  
46

### 47 **Patient Involvement**

48  
49 The study utilised data that had already been collected as part of routine patient care, and  
50 thus patients were not directly involved in the study. The findings will be used to further  
51 optimise their care and extend the intervention to other sites. We aim to include patients in  
52 those activities.  
53  
54  
55  
56  
57  
58  
59  
60

## Results

Of all Pap smears done in the JHD in the two years after decentralisation (114,983), 1.9% were done at HCHC (2227; Table 2). Of these, 18.0% had abnormal cytology and required colposcopy (n=401), compared to only 8.2% of other women in JHD as a whole (n=1826;  $p<0.001$ ).

In total, 910 women accessed colposcopy at CMJAH between October 2012 and September 2014. In the subsequent two years, 1120 women had a colposcopy: 399 at HCHC (35.6%) and 721 at CMJAH (64.4%; Table 1 and Figure 1a). The estimated colposcopy coverage among women who had a Pap smear at HCHC was 66.6% (267/401; 95%CI=61.7-71.2%).

The median age women at CMJAH was 37.1 years pre-decentralisation and 39.4 years post-decentralisation ( $p<0.001$ ), and was 37.5 years at HCHC. In the post-decentralisation period, more women at CMJAH were older than 45 years than women at HCHC (30.6% versus 21.9%;  $p=0.002$ ). At CMJAH, more women had a known HIV status pre-decentralisation than post-decentralisation (71.4% versus 59.5%,  $p<0.001$ ). All women at HCHC had a documented HIV status. Around 85% of women with a known HIV status were HIV positive in all three groups. The proportion of positive women receiving ART rose in the second period at CMJAH from 78.7% to 87.6% ( $p<0.001$ ), and almost all positive women were on ART at HCHC (99.7%;  $p<0.001$ ).

In both periods, the large majority of women who had a colposcopy at CMJAH had had a Pap smear elsewhere, while three quarters of women who had a colposcopy at HCHC also had their Pap smear at the facility. The percentage of women at CMJAH who had had a Pap smear at HCHC halved post-decentralisation ( $p<0.001$ ) and the absolute number decreased from 113 to 43. Post-decentralisation, the number of women who had a Pap smear at HCHC and then a colposcopy at either facility rose three-fold (from 113 to 350). At HCHC, post-decentralisation, 24.2% of women who had a colposcopy at HCHC, had a Negative for intraepithelial lesion or malignancy NILM or LSIL result on their Pap smear, compared with 18.5% in CMJAH in the same time period ( $p=0.02$ ). Overall, across all three time periods, 17 women had a suspected carcinoma on Pap smear (0.8%).

Almost half of the women at CMJAH had a delay in receiving colposcopy (>6 months between Pap smear and colposcopy) post-decentralisation, compared to about a third pre-

1  
2  
3 decentralisation (47.3% versus 36.2%,  $p < 0.001$ ; Figure 1b). At HCHC, 21.7% of women had a  
4 colposcopy within three months of a Pap smear being taken (versus 11.8% at CMJAH pre-  
5 and 15.4% post-decentralisation,  $p < 0.001$ ).  
6  
7

8  
9 At CMJAH, in both periods, nearly 60% of women had a biopsy at colposcopy (58.2%), while  
10 the same proportion had a Lletz at HCHC (58.2%). Women at HCHC were 3.6 fold more likely  
11 to have visual inspection only during colposcopy than women at CMJAH (95%CI odds ratio  
12 [OR]=2.3-5.4). Three women who had a colposcopy at HCHC were referred to CMJAH due to  
13 an unsuccessful procedure.  
14  
15

16  
17 Women at HCHC were 3.5 fold more likely to have a normal result on histology than women  
18 at CMJAH (95%CI OR=2.1-5.7). Post-decentralisation, 29.0% of women at CMJAH and 26.3%  
19 at HCHC had CIN III lesions ( $p = 0.37$ ; Figure 1c). Post-decentralisation, 11 women had a  
20 diagnosis of carcinoma on histology (1.1%), compared to 3 before decentralisation (0.4%;  
21  $p = 0.06$ ). The proportion of invalid specimens was similar across the three groups, ranging  
22 from 1.8 to 2.8%.  
23  
24  
25  
26  
27  
28  
29  
30

### 31 Discussion

32  
33 In this study we determined whether decentralisation to primary care level improved access  
34 to colposcopy services by reviewing the number of women attending the service before and  
35 after decentralisation, and the coverage of colposcopy among women at HCHC. We found  
36 that the cumulative number of colposcopies across the two facilities rose following  
37 decentralisation, and after only two years, HCHC was responsible for a third of all  
38 colposcopies in the sub-district, even though it performs a negligible number of Pap smears  
39 relative to other sites. Overall, following decentralisation, three fold more women who had  
40 a Pap smear at HCHC had a colposcopy, and at CMJAH, the proportion of women from HCHC  
41 also reduced almost threefold. The marked increase in number of women from HCHC who  
42 had a colposcopy indicates that prior to decentralisation there may have been a large unmet  
43 need for the service, which was now being addressed, at least in part. The coverage reached  
44 66.6%, considerably higher than figures in other settings.  
45  
46  
47  
48  
49  
50  
51  
52

53  
54 Decentralisation of colposcopy services to primary level care has several potential benefits.  
55 Firstly, with adequate training, tasks that had been performed by highly specialised staff can  
56  
57

1  
2  
3 be shifted to lower health worker cadres, allowing specialists to focus on more complex  
4 cases (18). Also, decentralisation may alleviate patient barriers to access, by bringing  
5 services closer to them – in settings they are familiar with – and reducing their transport and  
6 other costs (9, 18). Decentralisation has long been central to the provision of HIV services in  
7 this setting through, for example, task shifting, providing antiretroviral treatment in primary  
8 health care and the dispensing of drugs from local pharmacies, rather than clinics (19).

13  
14 Decentralisation of colposcopy can take several forms, including telecolposcopy from  
15 distant sites, outreach portable colposcopy, shifting of services to nurse practitioners or  
16 medical officers, and decentralisation to lower level facilities, as in this study (20). In other  
17 settings, shifting services to lower care levels was found to be cost-effective, acceptable to  
18 patients and to increase rates of attendance for colposcopy (12, 20, 21). In the Western  
19 Cape, South Africa, for example, colposcopy services were decentralised to a district  
20 hospital and provided by a gynaecologist (18). This raised uptake of the service and reduced  
21 time to procedure. Also, a study in the United Kingdom found that colposcopy could be  
22 performed by nurse practitioners, but they were restricted to only examining cases of post-  
23 coital bleeding (22). In high-income countries, services have been successfully decentralised  
24 to community health centres and portable outreach programmes in Alaska, the United  
25 States, and parts of Canada and Australia, targeting immigrant, Inuit and other vulnerable  
26 women (12, 13, 21, 23, 24).

36  
37 Women attending HCHC colposcopy were at lower risk than those at CMJAH, as shown by  
38 their younger age and lower grades of abnormalities on Pap smear and histology. This may  
39 suggest that, as the programme had envisaged, higher-risk patients are being referred to  
40 CMJAH. Overall, services at HCHC appear to be performing well, with all women tested for  
41 HIV and almost all those positive were receiving ART. In addition, colposcopy services were  
42 now integrated into their care, which was previously off-site, complex to access and marked  
43 by lengthy delays. HIV-positive women made up the large majority of patients in all groups,  
44 reflecting the higher levels of risk for cervical cancer in this population. Clearly it remains a  
45 priority to integrate screening for cervical cancer within all clinics providing antiretroviral  
46 treatment.

54  
55 The similar number of invalid histology samples and the isolated cases of failed colposcopy  
56 suggests that the quality of colposcopy services at HCHC may have been comparable to

1  
2  
3 CMJAH. Unlike at CMJAH, however, Lletz was the commonest procedure at HCHC, in  
4 keeping with evidence that Lletz is better suited to lower level facilities and staff (7). With  
5 decentralisation, it is critical to ensure that staff are adequately trained and service quality is  
6 closely monitored. The hesitancy to decentralise colposcopy to date, may reflect underlying  
7 concerns that cases of cancer may go undetected by lower-level staff. In some settings,  
8 lower-level health workers undergo a process of certification and have to perform a certain  
9 number of colposcopies per year to remain registered. While this approach may hold  
10 advantages, onerous processes around certification and recertification may lead to staff  
11 discontinuing colposcopy (22).

12  
13  
14  
15  
16  
17  
18  
19 The decline in number of colposcopies at CMJAH is concerning, and may reflect factors  
20 other than a reduction in demand that accompanies decentralisation. Fewer women at the  
21 site had a known HIV status and waiting times for colposcopy lengthened. Thus, though  
22 decentralisation can reduce the patient burden at referral centres, this does not necessarily  
23 translate into improved services at that site. Other patient and systems factors may play a  
24 larger influence, for example, coinciding with the period after decentralisation, CMJAH lost a  
25 number of senior specialists.

26  
27  
28  
29  
30  
31  
32  
33  
34  
35  
36  
37  
38  
39  
40  
41  
42  
43  
44  
45  
46  
47  
48  
49  
50  
51  
52  
53  
54  
55  
56  
57  
58  
59  
60  
Delays in colposcopy vary considerably between settings, from an average of 39 days from  
referral to colposcopy in one study in KwaZulu Natal, South Africa (8), to around 5-6 months  
in both our study and another in the Western Cape (18). It is concerning that time from Pap  
smear to colposcopy is greater than six months for half the women at CMJAH, and a third at  
HCHC. Reducing these delays is clearly a priority at both sites. We were unable, however, to  
discern reasons for these delays, which could be caused by delays in providing the results of  
Pap smears to patients, patient delays in making or attending appointments, or shortages of  
specialist staff. We could also not investigate which group of patients required referral to  
higher levels of care, and future studies might attempt to define criteria for referral.

Moreover, given the relatively short period of the review, we are unable to assess  
sustainability of the services in the long-run, a pressing question. Lastly, the study evaluated  
the use of colposcopy following cytological screening with Pap smears and these findings  
may not be generalizable to screening with HPV testing, which is increasingly being used in  
many countries (25). HPV testing has a considerably higher sensitivity for detecting

precursor lesions of cervical cancer compared to cytology, and thus may alter the number of patients requiring colposcopy and types of lesions identified (26, 27).

## Conclusion

In conclusion, decentralisation of colposcopy services can improve access to colposcopy, resulting in faster diagnoses of precancerous lesions of the cervix, more lesions being treated with LLETZ and a reduction in the burden of patients in tertiary hospitals. Most importantly, increasing the number of colposcopies and treatments of precancerous lesions could reduce the incidence of cervical cancer. This is particularly important among HIV-positive women who now live longer with ART, and the treatment of their co-morbidities is rapidly gaining in importance. Though coverage of colposcopy reached two thirds at HCHC, it is important to identify interventions to raise coverage levels. Decentralisation is unlikely to affect the quality of services if medical officers are appropriately trained, supervised and supported by clear up-referral guidelines. The approach presented here could be extended to other primary- or secondary-level facilities in South Africa, and perhaps encompass the use of portable colposcopes or telecolposcopy, under close supervision. If done correctly and at scale, decentralisation of colposcopy services, could shore up cervical cancer prevention and finally decrease the public health burden and mortality due to the cancer.

## Acknowledgements

We would like to acknowledge the following persons who contributed to this study:

H. Manyonga, Z. Dumakude, A. Moholola, N. Wattrus, L. Mbuyisa, I. Sishi, N. Twala, S. Sidabuka, E. Briedenhann, L. Mavuya, K. Moshaba, S. Mzobe, S. Carmona (NHLS), L. Chauke (Department of Obstetrics and Gynaecology, CMJAH).

## Funding

This study has been made possible through funding from USAID-PEPFAR, grant number: AID-A-12-67400021. We would also like to acknowledge the following organizations for donating a colposcopy machine to Hillbrow CHC: Vodacom, Altech and Altron.

## Competing Interests

1  
2  
3 All authors listed in this study do not have competing interests to declare.  
4

5 **Data sharing statement**  
6

7 There's no additional unpublished data from the study.  
8  
9  
10  
11  
12  
13

14 **Author Contributions**  
15

16  
17 **Manuscript title:** Decentralising colposcopy services raises access to treatment of abnormal  
18 cervical smears: a pilot in an inner-city clinic in Johannesburg, South Africa  
19

20  
21 *All persons who meet authorship criteria are listed as authors, and all authors certify that*  
22 *they have participated sufficiently in the work to take public responsibility for the content,*  
23 *including participation in the concept, design, analysis, writing, or revision of the manuscript.*  
24 *Furthermore, each author certifies that this material or similar material has not been and*  
25 *will not be submitted to or published in any other publication before its appearance in the*  
26 *Hong Kong Journal of Occupational Therapy.*  
27  
28  
29  
30

31  
32  
33  
34 *Authorship contributions Please indicate the specific contributions made by each author (list*  
35 *the authors' initials followed by their surnames, e.g., Y.L. Cheung). The name of each author*  
36 *must appear at least once in each of the three categories below.*  
37  
38  
39  
40  
41  
42

43 **Category 1**  
44

45 **Conception and design of study:** G. Maimela\*1, X. Nene\*1, S. Sawry, N. Mvundla, M.  
46 Chersich  
47  
48  
49  
50

51 **Acquisition of data:** G. Maimela, X. Nene, N. Mvundla,  
52  
53  
54  
55  
56  
57  
58  
59  
60

1  
2  
3 **Analysis and/or interpretation of data:** G. Maimela, X. Nene, S. Sawry, E. Kachingwe, M.  
4 Chersich, H. Rees; T. Smith.  
5  
6  
7  
8  
9

10  
11 **Category 2**  
12

13  
14 **Drafting the manuscript:** G. Maimela, X. Nene, N. Mvundla, S. Sawry, E. Kachingwe, M.  
15 Chersich.  
16  
17

18  
19  
20 **Revising the manuscript critically for important intellectual content:** M. Chersich, H. Rees,  
21 T. Smith  
22  
23

24  
25  
26  
27  
28  
29 **Category 3**  
30

31 **Approval of the version of the manuscript to be published** (*the names of all authors must*  
32 *be listed*):  
33  
34

35  
36  
37  
38 G. Maimela\*<sup>1</sup>, X. Nene\*<sup>1</sup>, N. Mvundla<sup>1</sup>, S. Sawry<sup>1</sup>, T. Smith<sup>2</sup>, H. Rees<sup>1</sup>, E.Kachingwe<sup>1</sup>, M.  
39 Chersich<sup>1</sup>  
40  
41  
42  
43  
44  
45

46 **Acknowledgements:** *All persons who have made substantial contributions to the work*  
47 *reported in the manuscript (e.g., technical help, writing and editing assistance, general*  
48 *support), but who do not meet the criteria for authorship, are named in the*  
49 *Acknowledgements and have given us their written permission to be named. If we have not*  
50 *included an Acknowledgements, then that indicates that we have not received substantial*  
51 *contributions from non-authors.*  
52  
53  
54  
55  
56  
57  
58  
59  
60



1  
2  
3 H. Manyonga, Z. Dumakude, A. Moholola, N. Wattrus, L. Mbuyisa, I. Sishi, N. Twala, S.  
4 Sidabuka, E. Briedenhann, L. Mavuya, K. Moshaba, S. Mzobe, S. Carmona (NHLS), L. Chauke  
5 (Department of Obstetrics and Gynaecology, CMJAH).  
6  
7

8  
9 This statement is signed by all the authors (a photocopy of this form may be used if there  
10 are more than 10 authors):  
11  
12  
13  
14  
15  
16  
17  
18  
19  
20  
21

## 22 **References**

- 23  
24 1. Bruni L, Barrionuevo-Rosas L, Albero G, Serrano B, Mena M, Gómez D, et al. ICO/IARC  
25 Information Centre on HPV and Cancer (HPV Information Centre). Human Papillomavirus  
26 and Related Diseases in the World. Summary Report 27 July 2017.
- 27  
28 2. Batra P, Kuhn L, Denny L. Utilisation and outcomes of cervical cancer prevention  
29 services among HIV-infected women in Cape Town. SAMJ: South African Medical Journal.  
30 2010;100:39-44.
- 31  
32 3. ICO/IARC Information Centre on HPV and Cancer. South Africa Human Papillomavirus  
33 and Related Cancers, Fact Sheet 2017. 2017.
- 34  
35 4. Shisana O, Rehle T, Simbayi LC, Zuma K, Jooste S, Zungu N, et al. South African  
36 National HIV Prevalence, Incidence and Behaviour Survey, 2012. Cape Town: HSRC Press;  
37 2014.
- 38  
39 5. Adler D, Wallace M, Bennie T, Abar B, Sadeghi R, Meiring T, et al. High risk human  
40 papillomavirus persistence among HIV-infected young women in South Africa. International  
41 journal of infectious diseases : IJID : official publication of the International Society for  
42 Infectious Diseases. 2015;33:219-21.
- 43  
44 6. Guiguet M, Boue F, Cadranel J, Lang JM, Rosenthal E, Costagliola D, et al. Effect of  
45 immunodeficiency, HIV viral load, and antiretroviral therapy on the risk of individual  
46 malignancies (FHDH-ANRS CO4): a prospective cohort study. Lancet Oncol.  
47 2009;10(12):1152-9.
- 48  
49 7. WHO. WHO guidelines for screening and treatment of precancerous lesions for  
50 cervical cancer prevention. 2013.
- 51  
52 8. Katz IT, Butler LM, Crankshaw TL, Wright AA, Bramhill K, Leone DA, et al. Cervical  
53 Abnormalities in South African Women Living With HIV With High Screening and Referral  
54 Rates. J Glob Oncol. 2016;2(6):375-80.
- 55  
56 9. Dawood S. Barriers and Facilitators to Colposcopy Attendance. Following an  
57 Abnormal Pap Smear: Patient and Provider Perspectives. Cape Town: University of Cape  
58 Town; 2014.

10. Momberg M, Botha MH, Van der Merwe FH, Moodley J. Women's experiences with cervical cancer screening in a colposcopy referral clinic in Cape Town, South Africa: a qualitative analysis. *BMJ open*. 2017;7(2):e013914.
11. Hoque M, Hoque E, Kader SB. Evaluation of cervical cancer screening program at a rural community of South Africa. *East African journal of public health*. 2008;5(2):111-6.
12. Martin B, Smith W, Orr P, Guijon F. Investigation and management of cervical intraepithelial neoplasia in Canadian Inuit: enhancing access to care. *Arctic Med Res*. 1995;54 Suppl 1:117-21.
13. Payne S, Jarrett N, Jeffs D. The impact of travel on cancer patients' experiences of treatment: a literature review. *Eur J Cancer Care (Engl)*. 2000;9(4):197-203.
14. Baranoski AS, Stier EA. Factors associated with time to colposcopy after abnormal Pap testing in HIV-infected women. *Journal of women's health (2002)*. 2012;21(4):418-24.
15. Stadler J, Chikandiwe A, Mayaud P, Rees H, Imrie J, Delany-Moretlwe S. Biographies of HIV and Cervical Cancer: Understanding Treatment-Seeking Amongst HIV Positive Women in Inner City Johannesburg. IAS conference, Durba, South Africa, Oral presentation. 2016.
16. Botha MH. Guidelines for cervical cancer screening in South Africa. *Southern African Journal of Gynaecological Oncology* 2017;9(1):8-12.
17. Harris PA, Taylor R, Thielke R, Payne J, Gonzalez N, Conde JG. Research electronic data capture (REDCap)--a metadata-driven methodology and workflow process for providing translational research informatics support. *J Biomed Inform*. 2009;42(2):377-81.
18. Blanckenberg ND, Oettle CA, Conradie HH, Krige FK. Impact of introduction of a colposcopy service in a rural South African sub-district on uptake of colposcopy. *South African Journal of Obstetrics and Gynaecology*. 2013;19(3).
19. Callaghan M, Ford N, Schneider H. A systematic review of task- shifting for HIV treatment and care in Africa. *Human resources for health*. 2010;8:8.
20. Bishai DM, Ferris DG, Litaker MS. What is the least costly strategy to evaluate cervical abnormalities in rural women? Comparing telemedicine, local practitioners, and expert physicians. *Med Decis Making*. 2003;23(6):463-70.
21. Ogilvie GS, Shaw EA, Lusk SP, Zazulak J, Kaczorowski JA. Access to colposcopy services for high-risk Canadian women: can we do better? *Can J Public Health*. 2004;95(5):346-51.
22. Sonnex C. Providing a genitourinary medicine colposcopy service. *Sexually transmitted infections*. 2014;90(1):8-10.
23. Gifford MS, Stone IK. Quality, access, and clinical issues in a nurse practitioner colposcopy outreach program. *The Nurse practitioner*. 1993;18(10):25-9, 33-6.
24. Hartz LE. Quality of care by nurse practitioners delivering colposcopy services. *J Am Acad Nurse Pract*. 1995;7(1):23-7.
25. Public Health England. NHS Cervical Screening Programme: Colposcopy and Programme Management. NHSCSP Publication number 20. Third Edition. 2016.
26. Dijkstra MG, Snijders PJ, Arbyn M, Rijkaart DC, Berkhof J, Meijer CJ. Cervical cancer screening: on the way to a shift from cytology to full molecular screening. *Ann Oncol*. 2014;25(5):927-35.
27. Wright TC, Jr., Stoler MH, Behrens CM, Sharma A, Sharma K, Apple R. Interlaboratory variation in the performance of liquid-based cytology: insights from the ATHENA trial. *Int J Cancer*. 2014;134(8):1835-43.

**Table 1: Patient characteristics and colposcopy outcomes at a community clinic, and a tertiary-level facility before and after decentralisation**

| Variables       |                               | Before versus after decentralisation at CMJAH |                                            |                | HCHC versus CMJAH after decentralisation |                |
|-----------------|-------------------------------|-----------------------------------------------|--------------------------------------------|----------------|------------------------------------------|----------------|
|                 |                               | A) Pre-decentralisation (2012-2014) N=910     | B) Post-decentralisation (2014-2016) N=721 | P (A versus B) | C) Hillbrow CHC (2014-2016) N=399        | P (B versus C) |
| Characteristics | Age groups in years           |                                               |                                            |                |                                          |                |
|                 | <20                           | 7 (0.8)                                       | 6 (0.8)                                    |                | 0 (0)                                    |                |
|                 | 20-34                         | 351 (39.8)                                    | 209 (30.2)                                 |                | 150 (37.6)                               |                |
|                 | 35-44                         | 342 (38.8)                                    | 266 (38.4)                                 |                | 156 (39.1)                               |                |
|                 | 45-59                         | 161 (18.3)                                    | 187 (27.0)                                 |                | 79 (19.8)                                |                |
| >60             | 20 (2.3)                      | 25 (3.6)                                      | 0.001                                      | 7 (1.8)        | 0.003                                    |                |
|                 | HIV status known              | 650 (71.4)                                    | 429 (59.5)                                 | <0.001         | 399 (100)                                | <0.001         |
|                 | HIV status <sup>^</sup>       |                                               |                                            |                |                                          |                |
|                 | Negative                      | 105 (16.2)                                    | 59 (13.8)                                  |                | 62 (15.5)                                |                |
|                 | Positive                      | 545 (83.9)                                    | 370 (86.3)                                 | 0.28           | 337 (84.5)                               | 0.47           |
|                 | On ART <sup>%</sup>           | 428/544 (78.7)                                | 324/370 (87.6)                             | <0.001         | 336/337 (99.7)                           | <0.001         |
| Cervical        | Facility where Pap smear done |                                               |                                            |                |                                          |                |
|                 | CMJAH                         | 115 (12.8)                                    | 124 (17.5)                                 |                | 0 (0.0)                                  |                |
|                 | HCHC                          | 114 (12.7)                                    | 43 (6.1)                                   |                | 307 (76.9)                               |                |
|                 | Other clinic or hospital      | 671 (74.6)                                    | 540 (76.4)                                 | <0.001         | 92 (23.1)                                | <0.001         |

|                           |                                   |            |            |         |            |        |
|---------------------------|-----------------------------------|------------|------------|---------|------------|--------|
|                           | Pap smear results                 |            |            |         |            |        |
|                           | NILM                              | 6 (0.7)    | 8 (1.1)    |         | 17 (4.3)   |        |
|                           | LSIL                              | 141 (15.5) | 125 (17.4) |         | 79 (20.0)  |        |
|                           | ASCUS                             | 19 (2.1)   | 34 (4.7)   |         | 4 (1.0)    |        |
|                           | HSIL                              | 678 (74.7) | 478 (66.4) |         | 263 (66.4) |        |
|                           | ASC-H                             | 63 (6.9)   | 65 (9.0)   |         | 27 (6.8)   |        |
|                           | Carcinoma                         | 1 (0.1)    | 10 (1.4)   | <0.001  | 6 (1.5)    | <0.001 |
|                           | Pap smear risk categories         |            |            |         |            |        |
|                           | NILM, LSIL or ACSUS               | 166 (18.3) | 167 (23.2) |         | 100 (25.3) |        |
|                           | HSIL, ASC-H or carcinoma          | 742 (81.7) | 553 (76.8) | 0.015   | 296 (74.8) | 0.44   |
| Cervical cancer diagnosis | Procedure during colposcopy       |            |            |         |            |        |
|                           | Visual inspection only            | 37 (4.1)   | 37 (5.2)   |         | 63 (15.9)  |        |
|                           | Lletz                             | 337 (37.2) | 258 (35.9) |         | 231 (58.2) |        |
|                           | Biopsy                            | 526 (58.0) | 420 (58.4) |         | 90 (22.7)  |        |
|                           | Other                             | 7 (0.8)    | 4 (0.6)    | 0.69    | 13 (3.3)   | <0.001 |
|                           | Histology result <sup>&amp;</sup> |            |            |         |            |        |
|                           | Normal                            | 27 (3.1)   | 30 (4.4)   |         | 45 (13.8)  |        |
|                           | CIN I                             | 254 (29.3) | 200 (29.3) |         | 84 (25.7)  |        |
|                           | CIN II                            | 298 (34.3) | 209 (30.7) |         | 99 (30.3)  |        |
|                           | CIN III                           | 236 (27.2) | 198 (29.0) |         | 86 (26.3)  |        |
| Carcinoma                 | 3 (0.4)                           | 9 (1.3)    |            | 2 (0.6) |            |        |
| Other <sup>*</sup>        | 34 (3.9)                          | 19 (2.8)   |            | 2 (0.6) |            |        |
| Invalid specimen          | 16 (1.8)                          | 17 (2.5)   | 0.10       | 9 (2.8) | <0.001     |        |

$\chi^2$  test for categorical variables or Wilcoxon Rank-sum test for continuous variables. <sup>&</sup>Of those with a known HIV status. <sup>%</sup>Of those HIV positive. <sup>&</sup>Of those with a histology specimen taken at biopsy, Lletz or other procedure. Charlotte Maxeke Johannesburg Academic Hospital (CMJAH). Hillbrow Community Health Centre (HCHC). <sup>\*</sup>Other includes infections such as cervicitis, inflammation and dysplasia

**Table 2: Cytology results in the City of Johannesburg in 2014-2016**

| Variable n (%)                     | Johannesburg health district*<br>(n=114,983) | Hillbrow Community Health Centre<br>(n=2227) | P      |
|------------------------------------|----------------------------------------------|----------------------------------------------|--------|
| <b>Pap smear results</b>           |                                              |                                              |        |
| NILM                               | 74,969 (65.2)                                | 852 (38.3)                                   |        |
| LSIL                               | 23,212 (20.2)                                | 790 (35.5)                                   |        |
| ASCUS                              | 7391 (6.4)                                   | 184 (8.3)                                    |        |
| HSIL                               | 7808 (6.8)                                   | 364 (16.3)                                   |        |
| ASC-H                              | 1221 (1.1)                                   | 28 (1.3)                                     |        |
| Carcinoma                          | 382 (0.3)                                    | 9 (0.4)                                      | <0.001 |
| <b>Number requiring colposcopy</b> |                                              |                                              |        |
| No (NILM, LSIL or ASCUS)           | 105,572 (91.8)                               | 9411 (82.0)                                  | <0.001 |
| Yes (HSIL, ASC-H or carcinoma)     | 1826 (8.2)                                   | 401 (18.0)                                   |        |

Data from the National Health Laboratory Service. Excludes invalid or missing specimens, and other Pap smear results (n=2446). \*District total excludes HCHC

**Table 1: Patient characteristics and colposcopy outcomes at a community clinic, and a tertiary-level facility before and after decentralisation**

| Variables                 |                                         | Before versus after decentralisation at CMJAH |                                            |                | HCHC versus CMJAH after decentralisation |                |
|---------------------------|-----------------------------------------|-----------------------------------------------|--------------------------------------------|----------------|------------------------------------------|----------------|
|                           |                                         | A) Pre-decentralisation (2012-2014) N=910     | B) Post-decentralisation (2014-2016) N=721 | P (A versus B) | C) Hillbrow CHC (2014-2016) N=399        | P (B versus C) |
| Characteristics           | <b>Age groups in years</b>              |                                               |                                            |                |                                          |                |
|                           | <20                                     | 7 (0.8)                                       | 6 (0.8)                                    |                | 0 (0)                                    |                |
|                           | 20-34                                   | 351 (39.8)                                    | 209 (30.2)                                 |                | 150 (37.6)                               |                |
|                           | 35-44                                   | 342 (38.8)                                    | 266 (38.4)                                 |                | 156 (39.1)                               |                |
|                           | 45-59                                   | 161 (18.3)                                    | 187 (27.0)                                 |                | 79 (19.8)                                |                |
|                           | >60                                     | 20 (2.3)                                      | 25 (3.6)                                   | 0.001          | 7 (1.8)                                  | 0.003          |
|                           | <b>HIV status known</b>                 | 650 (71.4)                                    | 429 (59.5)                                 | <0.001         | 399 (100)                                | <0.001         |
|                           | <b>HIV status<sup>^</sup></b>           |                                               |                                            |                |                                          |                |
|                           | Negative                                | 105 (16.2)                                    | 59 (13.8)                                  |                | 62 (15.5)                                |                |
|                           | Positive                                | 545 (83.9)                                    | 370 (86.3)                                 | 0.28           | 337 (84.5)                               | 0.47           |
|                           | <b>On ART<sup>%</sup></b>               | 428/544 (78.7)                                | 324/370 (87.6)                             | <0.001         | 336/337 (99.7)                           | <0.001         |
| Cervical cancer screening | <b>Facility where Pap smear done</b>    |                                               |                                            |                |                                          |                |
|                           | CMJAH                                   | 115 (12.8)                                    | 124 (17.5)                                 |                | 0 (0.0)                                  |                |
|                           | HCHC                                    | 114 (12.7)                                    | 43 (6.1)                                   |                | 307 (76.9)                               |                |
|                           | Other clinic or hospital                | 671 (74.6)                                    | 540 (76.4)                                 | <0.001         | 92 (23.1)                                | <0.001         |
|                           | <b>Pap smear results</b>                |                                               |                                            |                |                                          |                |
|                           | NILM                                    | 6 (0.7)                                       | 8 (1.1)                                    |                | 17 (4.3)                                 |                |
|                           | LSIL                                    | 141 (15.5)                                    | 125 (17.4)                                 |                | 79 (20.0)                                |                |
| ASCUS                     | 19 (2.1)                                | 34 (4.7)                                      |                                            | 4 (1.0)        |                                          |                |
| HSIL                      | 678 (74.7)                              | 478 (66.4)                                    |                                            | 263 (66.4)     |                                          |                |
| ASC-H                     | 63 (6.9)                                | 65 (9.0)                                      |                                            | 27 (6.8)       |                                          |                |
| Carcinoma                 | 1 (0.1)                                 | 10 (1.4)                                      | <0.001                                     | 6 (1.5)        | <0.001                                   |                |
|                           | <b>Pap smear risk categories</b>        |                                               |                                            |                |                                          |                |
|                           | NILM, LSIL or ACSUS                     | 166 (18.3)                                    | 167 (23.2)                                 |                | 100 (25.3)                               |                |
|                           | HSIL, ASC-H or carcinoma                | 742 (81.7)                                    | 553 (76.8)                                 | 0.015          | 296 (74.8)                               | 0.44           |
| Cervical cancer diagnosis | <b>Procedure during colposcopy</b>      |                                               |                                            |                |                                          |                |
|                           | Visual inspection only                  | 37 (4.1)                                      | 37 (5.2)                                   |                | 63 (15.9)                                |                |
|                           | Lletz                                   | 337 (37.2)                                    | 258 (35.9)                                 |                | 231 (58.2)                               |                |
|                           | Biopsy                                  | 526 (58.0)                                    | 420 (58.4)                                 |                | 90 (22.7)                                |                |
|                           | Other                                   | 7 (0.8)                                       | 4 (0.6)                                    | 0.69           | 13 (3.3)                                 | <0.001         |
|                           | <b>Histology result<sup>&amp;</sup></b> |                                               |                                            |                |                                          |                |
|                           | Normal                                  | 27 (3.1)                                      | 30 (4.4)                                   |                | 45 (13.8)                                |                |
|                           | CIN I                                   | 254 (29.3)                                    | 200 (29.3)                                 |                | 84 (25.7)                                |                |
|                           | CIN II                                  | 298 (34.3)                                    | 209 (30.7)                                 |                | 99 (30.3)                                |                |
|                           | CIN III                                 | 236 (27.2)                                    | 198 (29.0)                                 |                | 86 (26.3)                                |                |
| Carcinoma                 | 3 (0.4)                                 | 9 (1.3)                                       |                                            | 2 (0.6)        |                                          |                |
| Other <sup>*</sup>        | 34 (3.9)                                | 19 (2.8)                                      |                                            | 2 (0.6)        |                                          |                |
| Invalid specimen          | 16 (1.8)                                | 17 (2.5)                                      | 0.10                                       | 9 (2.8)        | <0.001                                   |                |

$\chi^2$  test for categorical variables or Wilcoxon Rank-sum test for continuous variables. <sup>^</sup>Of those with a known HIV status. <sup>%</sup>Of those HIV positive. <sup>&</sup>Of those with a histology specimen taken at biopsy, Lletz or other procedure. Charlotte Maxeke Johannesburg Academic Hospital (CMJAH). Hillbrow Community Health Centre (HCHC). <sup>\*</sup>Other includes infections such as cervicitis, inflammation and dysplasia

**Table 2: Cytology results in the City of Johannesburg in 2014-2016**

| Variable n (%)                     | Johannesburg health district*<br>(n=114,983) | Hillbrow Community Health Centre<br>(n=2227) | P      |
|------------------------------------|----------------------------------------------|----------------------------------------------|--------|
| <b>Pap smear results</b>           |                                              |                                              |        |
| NILM                               | 74,969 (65.2)                                | 852 (38.3)                                   |        |
| LSIL                               | 23,212 (20.2)                                | 790 (35.5)                                   |        |
| ASCUS                              | 7391 (6.4)                                   | 184 (8.3)                                    |        |
| HSIL                               | 7808 (6.8)                                   | 364 (16.3)                                   |        |
| ASC-H                              | 1221 (1.1)                                   | 28 (1.3)                                     |        |
| Carcinoma                          | 382 (0.3)                                    | 9 (0.4)                                      | <0.001 |
| <b>Number requiring colposcopy</b> |                                              |                                              |        |
| No (NILM, LSIL or ASCUS)           | 105,572 (91.8)                               | 9411 (82.0)                                  |        |
| Yes (HSIL, ASC-H or carcinoma)     | 1826 (8.2)                                   | 401 (18.0)                                   | <0.001 |

Data from the National Health Laboratory Service. Excludes invalid or missing specimens, and other Pap smear results (n=2446). \*District total excludes HCHC

1  
2  
3  
4  
5  
6  
7  
8  
9  
10  
11  
12  
13  
14  
15  
16  
17  
18  
19  
20  
21  
22  
23  
24  
25  
26  
27  
28  
29  
30  
31  
32  
33  
34  
35  
36  
37  
38  
39  
40  
41  
42  
43  
44  
45  
46  
47  
48  
49  
50  
51  
52  
53  
54  
55  
56  
57  
58  
59  
60

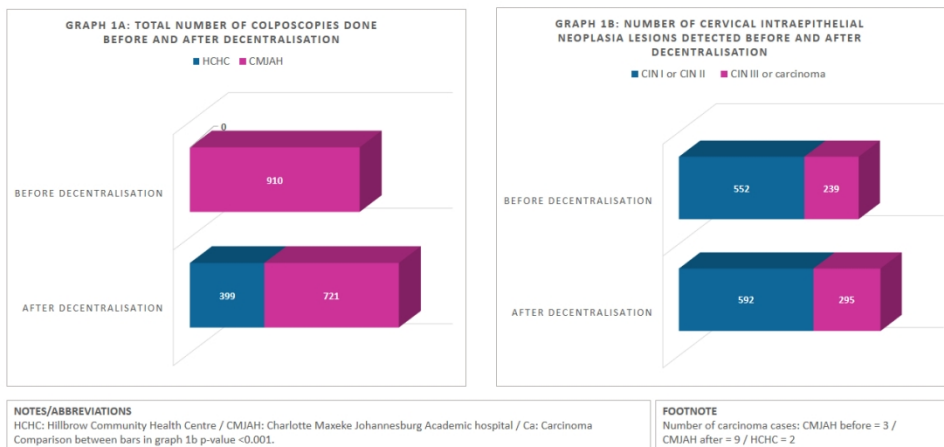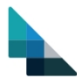

355x266mm (96 x 96 DPI)



1  
2  
3  
4  
5  
6  
7  
8  
9  
10  
11  
12  
13  
14  
15  
16  
17  
18  
19  
20  
21  
22  
23  
24  
25  
26  
27  
28  
29  
30  
31  
32  
33  
34  
35  
36  
37  
38  
39  
40  
41  
42  
43  
44  
45  
46  
47  
48  
49  
50  
51  
52  
53  
54  
55  
56  
57  
58  
59  
60

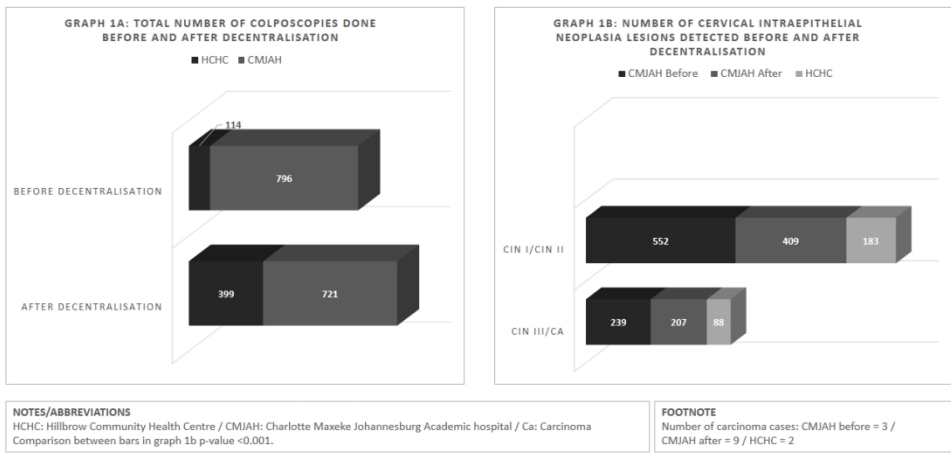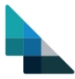

355x266mm (96 x 96 DPI)

# BMJ Open

## The impact of decentralising colposcopy services from tertiary- to primary-level care in inner-city Johannesburg, South Africa: a before and after study

|                                 |                                                                                                                                                                                                                                                                                                                                                                                                                                                                                                                                                                                                                                                                                                                                                                                                                                                                                                                                                                                                                             |
|---------------------------------|-----------------------------------------------------------------------------------------------------------------------------------------------------------------------------------------------------------------------------------------------------------------------------------------------------------------------------------------------------------------------------------------------------------------------------------------------------------------------------------------------------------------------------------------------------------------------------------------------------------------------------------------------------------------------------------------------------------------------------------------------------------------------------------------------------------------------------------------------------------------------------------------------------------------------------------------------------------------------------------------------------------------------------|
| Journal:                        | <i>BMJ Open</i>                                                                                                                                                                                                                                                                                                                                                                                                                                                                                                                                                                                                                                                                                                                                                                                                                                                                                                                                                                                                             |
| Manuscript ID                   | bmjopen-2018-024726.R1                                                                                                                                                                                                                                                                                                                                                                                                                                                                                                                                                                                                                                                                                                                                                                                                                                                                                                                                                                                                      |
| Article Type:                   | Research                                                                                                                                                                                                                                                                                                                                                                                                                                                                                                                                                                                                                                                                                                                                                                                                                                                                                                                                                                                                                    |
| Date Submitted by the Author:   | 02-Nov-2018                                                                                                                                                                                                                                                                                                                                                                                                                                                                                                                                                                                                                                                                                                                                                                                                                                                                                                                                                                                                                 |
| Complete List of Authors:       | Maimela, Gloria; University of the Witwatersrand, Wits Reproductive Health and HIV Institute, Faculty of Health Sciences<br>Nene, Xolisile; University of the Witwatersrand , Wits Reproductive Health and HIV Institute, Faculty of Health Sciences<br>Mvundla, Nontuthuko; University of the Witwatersrand , Wits Reproductive Health and HIV Institute, Faculty of Health Sciences<br>Sawry, Shobna; University of the Witwatersrand , Wits Reproductive Health and HIV Institute, Faculty of Health Sciences<br>Smith, Trudy; University of the Witwatersrand , Wits Donald Gordon Medical Centre, Faculty of Health Sciences<br>Rees, Helen; University of the Witwatersrand , Wits Reproductive Health and HIV Institute, Faculty of Health Sciences<br>Kachingwe, Elizabeth; University of the Witwatersrand , Wits Reproductive Health and HIV Institute, Faculty of Health Sciences<br>Chersich, Matthew; University of the Witwatersrand , Wits Reproductive Health and HIV Institute, Faculty of Health Sciences |
| <b>Primary Subject Heading</b>: | Public health                                                                                                                                                                                                                                                                                                                                                                                                                                                                                                                                                                                                                                                                                                                                                                                                                                                                                                                                                                                                               |
| Secondary Subject Heading:      | Diagnostics, Obstetrics and gynaecology, Oncology, Reproductive medicine                                                                                                                                                                                                                                                                                                                                                                                                                                                                                                                                                                                                                                                                                                                                                                                                                                                                                                                                                    |
| Keywords:                       | Colposcopy < GYNAECOLOGY, Community gynaecology < GYNAECOLOGY, Gynaecological oncology < GYNAECOLOGY, Minimally invasive surgery < GYNAECOLOGY, PRIMARY CARE, Decentralised Care                                                                                                                                                                                                                                                                                                                                                                                                                                                                                                                                                                                                                                                                                                                                                                                                                                            |
|                                 |                                                                                                                                                                                                                                                                                                                                                                                                                                                                                                                                                                                                                                                                                                                                                                                                                                                                                                                                                                                                                             |

SCHOLARONE™  
Manuscripts

1  
2  
3  
4 **Title:** The impact of decentralising colposcopy services from tertiary- to  
5  
6 primary-level care in inner-city Johannesburg, South Africa: a before and after  
7  
8 study  
9  
10

11  
12 **Authors:** G. Maimela\*<sup>1</sup>, X. Nene\*<sup>1</sup>, N. Mvundla<sup>1</sup>, S. Sawry<sup>1</sup>, T. Smith<sup>2</sup>, H.  
13  
14 Rees<sup>1</sup>, E.Kachingwe<sup>1</sup>, M. Chersich<sup>1</sup>  
15  
16

17  
18  
19 **Affiliations:**  
20  
21

- 22  
23 1. Wits Reproductive Health and HIV Institute, Faculty of Health Sciences,  
24  
25 University of the Witwatersrand, South Africa  
26  
27  
28 2. Department of Obstetrics and Gynaecology, School of Clinical Medicine,  
29  
30 Charlotte Maxeke Johannesburg Academic Hospital, Faculty of Health  
31  
32 Sciences, University of the Witwatersrand, South Africa  
33  
34  
35

36  
37 **Corresponding author:** Gloria Maimela, [GMaimela@wrhi.ac.za](mailto:GMaimela@wrhi.ac.za), Wits  
38  
39  
40 Reproductive Health and HIV Institute, Faculty of Health Sciences, University  
41  
42 of the Witwatersrand, South Africa.  
43  
44  
45  
46  
47  
48  
49  
50  
51  
52  
53  
54  
55  
56  
57  
58  
59  
60

1  
2  
3  
4  
5  
6  
7  
8  
9  
10  
11  
12  
13  
14  
15  
16  
17  
18  
19  
20  
21  
22  
23  
24  
25  
26  
27  
28  
29  
30  
31  
32  
33  
34  
35  
36  
37  
38  
39  
40  
41  
42  
43  
44  
45  
46  
47  
48  
49  
50  
51  
52  
53  
54  
55  
56  
57  
58  
59  
60

For peer review only

## ABSTRACT

**Objective:** To assess whether decentralising colposcopy services to a primary care facility in inner-city Johannesburg, South Africa raises access to colposcopy.

**Design:** Before-after study comparing two years before and two after decentralisation, using clinical records, and laboratory data on cervical cytology and histology.

**Primary outcome:** The proportion of all women attending Hillbrow Community Health Centre (HCHC) with an abnormal Pap smear who had a colposcopy post-decentralisation.

**Setting:** Charlotte Maxeke Johannesburg Academic Hospital (CMJAH) has provided colposcopy services for several decades. HCHC, located about 3km away, began colposcopy services in 2014.

**Participants:** Women, aged above 18 years, who had a colposcopy for diagnosis and treatment of precancerous cervical lesions following a Pap smear, from 2012-2016 at CMJAH or HCHC.

**Results:** Pre-decentralisation at CMJAH, 910 women had colposcopy (2012-2014). Post-decentralisation (2014-2016), 721 had colposcopy at CMJAH and 399 at HCHC, the decentralised facility. The number who had a Pap smear at

1  
2  
3  
4 HCHC and then a colposcopy rose three-fold post-decentralisation (114  
5  
6 versus 350). Post-decentralisation, 43 women at HCHC were referred from  
7  
8  
9 CMJAH for colposcopy, compared to 114 pre-decentralisation. Post-  
10  
11 decentralisation, 47.3% of women at CMJAH waited >6 months for  
12  
13 colposcopy, while 35.5% did at HCHC ( $p<0.001$ ). Across all three groups,  
14  
15 26.9-30.3% of women had CIN III lesions or carcinoma on colposcopy. The  
16  
17 proportion of invalid specimens was similar at CMJAH and HCHC (1.8-2.8%).  
18  
19 Of 401 women who had an abnormal Pap smear at HCHC post-  
20  
21 decentralisation, 267 had colposcopy (66.6%).  
22  
23  
24  
25  
26  
27  
28  
29

30 **Conclusion:** Decentralisation can decrease the time to colposcopy and reduce  
31  
32 the workload of tertiary hospitals. Overall, more women accessed services.  
33  
34 Colposcopy coverage at HCHC is higher than other sites, but could be further  
35  
36 improved. Decentralisation did not appear to affect the quality of services and  
37  
38 this model could be extended to similar settings in South Africa and  
39  
40  
41 elsewhere.  
42  
43  
44  
45

46 **Key words:** South Africa, colposcopy, cervical cancer, primary health care,  
47  
48 decentralisation  
49  
50  
51  
52  
53  
54  
55  
56

## 57 STRENGTHS AND LIMITATIONS OF THIS STUDY

58  
59  
60

- 1  
2  
3  
4  
5  
6  
7  
8  
9  
10  
11  
12  
13  
14  
15  
16  
17  
18  
19  
20  
21  
22  
23  
24  
25  
26  
27  
28  
29  
30  
31  
32  
33  
34  
35  
36  
37  
38  
39  
40  
41  
42  
43  
44  
45  
46  
47  
48  
49  
50  
51  
52  
53  
54  
55  
56  
57  
58  
59  
60
- Data were collected for the purposes of patient care, and not specifically for research, potentially reducing data quality.
  - The limited data available meant that the study could not fully investigate several important questions, such as reasons for delays in colposcopy or a detailed assessment of the quality of decentralised services. Additionally, the absence of baseline data at the primary care site does not allow us to directly compare changes in access among women at the primary care site over time.
  - As the study only included a single primary care centre, we are unable to fully assess the potential impact of a broader decentralisation strategy. The findings of this study may thus not be generalizable to a larger initiative that, for example, adopted a hub and spoke approach encompassing several primary care centres.
  - Given that the study only covered the first two years after decentralisation, we are unable to ascertain the intervention's long-term sustainability.
  - The study strengths include a relatively large number of women in all study groups, allowing us to detect differences between the time periods

## INTRODUCTION

Cervical cancer is a largely preventable disease and WHO has recently launched an initiative aimed at eliminating the condition.[1] At present, cervical cancer is the second most common cancer among women aged 15 to 44 years in the world.[2] In South Africa, it is the commonest cancer in that age group, and mortality rates are high.[3, 4] About 3% of women in South Africa harbour cervical human papilloma virus (HPV)-16/18, which is responsible for the majority of cases of cervical cancer in the country.[4] Rates of cervical cancer in South Africa can partly be attributed to the high level of HIV.[5] Women with HIV infection have a seven-fold higher rate of persistence of high-risk HPV compared to HIV uninfected women,[6] heightening their risk for incident and progressive precancerous lesions. While antiretroviral therapy reduces the risk of cervical cancer and its precursors, the risk remains much higher than for HIV-negative women.[7]

In South Africa, the policy for cervical cancer screening was introduced in 2001 and updated in 2017.[8] The policy recommends that low-risk women have three Pap smears in a lifetime at the ages of 30, 40 and 50 years, while women with HIV-infection are to be screened every three years, regardless of age. Screening is predominately based on cytology using Papanikolaou (Pap) smears, although there are plans to introduce liquid-based cytology which



1  
2  
3 offers the potential to do HPV screening. Women with atypical findings on  
4  
5  
6 cytology are referred for colposcopy to establish a definitive diagnosis. During  
7  
8  
9 colposcopy, the view of the cervix is magnified and, where required, a biopsy  
10  
11  
12 is taken or a large loop excision of the transformation zone (LLETZ) is  
13  
14  
15 conducted.[9]  
16

17  
18 A range of health systems and patient factors influence access to colposcopy.  
19  
20  
21 System barriers include a limited number of colposcopy services, which are  
22  
23  
24 mostly centralised within tertiary-level facilities, with long waiting times for  
25  
26  
27 patients and few opportunities for non-specialist health workers to develop  
28  
29  
30 requisite skills.[10] There are limited numbers of specialist gynaecologists  
31  
32  
33 within the public sector, and the high demands on these doctors for  
34  
35  
36 emergency and curative obstetric and gynaecology services may reduce their  
37  
38  
39 time available for diagnostic or preventive interventions, such as colposcopy.  
40  
41  
42 Another key factor is the complexity of providing Pap and other results to  
43  
44  
45 patients and then scheduling colposcopy appointments across the disjointed  
46  
47  
48 systems that often exist between a tertiary hospital and primary care  
49  
50  
51 centres.[11-13] Patient-related factors linked with low uptake of colposcopy  
52  
53  
54 include low education levels, being single, fear of HIV testing and disclosure, a  
55  
56  
57 low CD4 count in HIV-infected women and transport costs for the additional  
58  
59  
60 visits.[12, 14, 15] Patient demand for colposcopy is also undermined by a

1  
2  
3  
4 general fear of cancer, and lack of awareness or knowledge about cervical  
5  
6 cancer.[11, 16] Poor patient-provider interactions restrict access, whilst a  
7  
8 longstanding relationship with a primary clinician can optimise uptake.[16]  
9

10  
11  
12 In South Africa, colposcopy procedures are generally done at tertiary-level  
13  
14 facilities, by specialist gynaecology oncologists and trainee gynaecologists  
15  
16 under supervision. While there may be benefits to decentralising colposcopy  
17  
18 services to lower levels of care, these need to be balanced by the advantages  
19  
20 of centralization of cancer services, such as concentrating clinical expertise,  
21  
22 with a higher quality of care, and the rationalisation of expensive specialist  
23  
24 equipment. Thus, in this before- and after-study, we aimed to determine if  
25  
26 access to colposcopy increased following the decentralisation of colposcopy  
27  
28 services from a tertiary-level hospital to a primary care facility in inner-city  
29  
30 Johannesburg, South Africa. We compare the total number of colposcopies  
31  
32 done and the coverage of colposcopy services in the primary-level facility after  
33  
34 decentralisation. We also compare the two sites, specifically, the patient profile  
35  
36 and cervical cancer risks, colposcopy procedures, quality of the services and  
37  
38 histology outcomes.  
39  
40  
41  
42  
43  
44  
45  
46  
47  
48  
49  
50

## 51 52 53 **METHODS**

### 54 55 56 **Study participants and setting** 57 58 59 60

1  
2  
3  
4 Women, aged 18 years and older, who accessed colposcopy services at either  
5  
6 Charlotte Maxeke Johannesburg Academic Hospital (CMJAH) or Hillbrow  
7  
8 Community Health Centre (HCHC) between October 2012 and September  
9  
10 2016 were included in the study. Both facilities are in sub-district F of the  
11  
12 Johannesburg Health District (JHD).  
13  
14  
15  
16

17  
18 The colposcopy clinic at CMJAH is part of the Gynaecology-Oncology  
19  
20 Department at CMJAH, which has two colposcopy machines. Women  
21  
22 attending a facility in JHD who have an abnormal Pap smear are referred to  
23  
24 the facility, where they are provided with an appointment date for colposcopy.  
25  
26  
27  
28  
29

30  
31 Hillbrow Community Health Centre (HCHC) is situated in the densely  
32  
33 populated inner-city area of Hillbrow, about 3km from CMJAH.[17] HCHC  
34  
35 provides primary level care, including a 24 hour casualty and a midwife  
36  
37 obstetrics unit. The facility is run predominantly by nursing staff, with support  
38  
39 from non-specialist medical doctors.  
40  
41  
42  
43  
44

### 45 **Implementation of decentralised services**

46  
47

48  
49 In 2013, a review of patient files at HCHC found that a large proportion of  
50  
51 women attending the HIV clinic had high-risk lesions on Pap smear.[18]  
52  
53

54  
55 Moreover, there were reports from patients and health workers at HCHC of  
56  
57 prolonged waiting times for colposcopy services at CMJAH. The Wits  
58  
59  
60

1  
2  
3  
4 Reproductive Health and HIV Institute (Wits RHI) thus set about establishing  
5  
6 decentralised colposcopy services at HCHC. A private sector company  
7  
8 donated a colposcopy machine. Two district medical officers were trained by  
9  
10 specialist gynaecology oncologists at CMJAH to provide the service. CMJAH  
11  
12 staff provided ongoing support and established referral processes between the  
13  
14 two facilities. Monthly meetings were held between staff at the two facilities,  
15  
16 where concerns and difficult cases could be discussed.  
17  
18  
19  
20  
21  
22  
23

24 The services, which began in October 2014, were provided twice a week by  
25  
26 the medical officers, with assistance from the nurse who takes Pap smears at  
27  
28 the facility. Patients attending HCHC and some referred from surrounding  
29  
30 clinics were given an appointment for colposcopy if they had an abnormal Pap  
31  
32 smear result, defined as: high-grade squamous intraepithelial lesion (HSIL),  
33  
34 atypical squamous cell and HSIL cannot be excluded (ASC-H), or squamous  
35  
36 cell carcinoma (SCC).[19] A few patients with Pap smear results other than  
37  
38 those defined as abnormal smears were also referred for colposcopy. Patients  
39  
40 with complex lesions, such as abnormal cervical anatomy or a high suspicion  
41  
42 of cancer on Pap smear were referred to CMJAH, as were those with a failed  
43  
44 colposcopy. Colposcopy procedures included colposcopic assessment only, or  
45  
46 colposcopic assessment together with either a Lletz or biopsy. Histology  
47  
48 specimens were processed at the National Health Laboratory Service (NHLS).  
49  
50  
51  
52  
53  
54  
55  
56  
57  
58  
59  
60

## Data sources and collection

For the purpose of this evaluation, women who accessed colposcopy services at CMJAH and HCHC were divided into three groups: 1) pre-decentralisation at CMJAH between October 2012 and September 2014; 2) post-decentralisation at CMJAH between October 2014 and September 2016; and 3) post-decentralisation at HCHC between October 2014 and September 2016.

At CMJAH, we extracted data from paper-based records at the colposcopy clinic, including on patients' age, HIV status, antiretroviral treatment, date of Pap smear, Pap smear result, date of colposcopy, colposcopy procedure performed and histology results. Data were entered into a REDCap electronic database (REDCap Software, Version 4.14.5, Vanderbilt University).[20]. At HCHC, demographic and clinical data on women who accessed colposcopy services were entered into an MS Excel spreadsheet after each patient visit. Data were obtained from the NHLS on Pap smear cytology for women attending HCHC who had a Pap smear and for the whole of JHD.

## Study variables and statistical analysis

Patient characteristics and colposcopy procedures were compared between the three groups. Time to colposcopy was calculated as the number of months from date of Pap smear to colposcopy and was categorised as optimal (under

1  
2  
3  
4 3 months), acceptable (3-6 months) and delayed (greater than 6 months).

5  
6 Histology results were classified as normal (includes benign endocervical  
7 polyp, atrophic ectocervical mucosa, koilocytosis and metaplasia), Cervical  
8  
9 Intraepithelial Neoplasia (CIN) I, CIN II, CIN III, carcinoma, other (includes  
10  
11 infections such as cervicitis, inflammation and dysplasia) and invalid  
12  
13 specimens (includes absent results). We used the proportion of invalid  
14  
15 specimens and number of failed colposcopies as proxy markers of the quality  
16  
17 of services. The coverage of colposcopy services at HCHC, the primary  
18  
19 outcome, was estimated by calculating the proportion of all women at HCHC  
20  
21 with an abnormal Pap smear who had a colposcopy. Differences between the  
22  
23 three study groups were assessed using a chi-square test or a Wilcoxon rank-  
24  
25 sum test, as appropriate. All data were analysed using STATA version 13.0.  
26  
27  
28  
29  
30  
31  
32  
33  
34  
35  
36  
37

### 38 **Ethical considerations**

39  
40  
41 Ethical approval was obtained from Human Research Ethics Committee of the  
42  
43 University of the Witwatersrand (Certificate number: M151184). Permission for  
44  
45 use of the CMJAH data was granted by the hospital's Chief Executive Officer,  
46  
47 and the head of the Department of Obstetrics and Gynaecology at CMJAH.

48  
49  
50 The NHLS Academic Affairs and Research Office gave permission for use of  
51  
52 their data.  
53  
54  
55  
56  
57  
58

### 59 **Patient involvement**

60

The study utilised data that had already been collected as part of routine patient care, and thus patients were not directly involved in the study. We did, however, attempt to contact patients who had abnormal lesions on histology and had not attended follow-up visits.

## RESULTS

### Access to colposcopy and timeliness of services

In total, 910 women accessed colposcopy at CMJAH between October 2012 and September 2014. In the subsequent two years, 1120 women had a colposcopy: 399 at HCHC (35.6%) and 721 at CMJAH (64.4%; Table 1 and Figure 1).

One quarter of women who had a colposcopy at HCHC had had their Pap smear at another facility. The percentage of women at CMJAH who had had a Pap smear at HCHC halved post-decentralisation ( $p < 0.001$ ) and the absolute number decreased from 113 to 43. The number of women who had a Pap smear at HCHC and then a colposcopy at either facility was three-fold higher post-decentralisation than pre-decentralisation (from 113 to 350) (Table 1).

**Table 1:** Patient characteristics and colposcopy outcomes at a community clinic, and a tertiary-level facility before and after decentralisation

| Variables | Before versus after decentralisation at CMJAH | HCHC versus CMJAH after decentralisation |
|-----------|-----------------------------------------------|------------------------------------------|
|-----------|-----------------------------------------------|------------------------------------------|

|                                  |                                      | A) Pre-decentralisation (2012-2014) N=910 | B) Post-decentralisation (2014-2016) N=721 | P (A vs B) | C) Hillbrow CHC (2014-2016) N=399 | P (B vs C) |
|----------------------------------|--------------------------------------|-------------------------------------------|--------------------------------------------|------------|-----------------------------------|------------|
| <b>Characteristics</b>           | <b>Age groups in years</b>           |                                           |                                            |            |                                   |            |
|                                  | <20                                  | 7 (0.8)                                   | 6 (0.8)                                    |            | 0 (0)                             |            |
|                                  | 20-34                                | 351 (39.8)                                | 209 (30.2)                                 |            | 150 (37.6)                        |            |
|                                  | 35-44                                | 342 (38.8)                                | 266 (38.4)                                 |            | 156 (39.1)                        |            |
|                                  | 45-59                                | 161 (18.3)                                | 187 (27.0)                                 |            | 79 (19.8)                         |            |
| >60                              | 20 (2.3)                             | 25 (3.6)                                  | 0.001                                      | 7 (1.8)    | 0.003                             |            |
|                                  | <b>HIV status known</b>              | 650 (71.4)                                | 429 (59.5)                                 | <0.001     | 399 (100)                         | <0.001     |
|                                  | <b>HIV status<sup>^</sup></b>        |                                           |                                            |            |                                   |            |
|                                  | Negative                             | 105 (16.2)                                | 59 (13.8)                                  |            | 62 (15.5)                         |            |
|                                  | Positive                             | 545 (83.9)                                | 370 (86.3)                                 | 0.28       | 337 (84.5)                        | 0.47       |
|                                  | <b>On ART<sup>%</sup></b>            | 428/544 (78.7)                            | 324/370 (87.6)                             | <0.001     | 336/337 (99.7)                    | <0.001     |
| <b>Cervical cancer Screening</b> | <b>Facility where Pap smear done</b> |                                           |                                            |            |                                   |            |
|                                  | CMJAH                                | 115 (12.8)                                | 124 (17.5)                                 |            | 0 (0.0)                           |            |
|                                  | HCHC                                 | 114 (12.7)                                | 43 (6.1)                                   |            | 307 (76.9)                        |            |
|                                  | Other clinic or hospital             | 671 (74.6)                                | 540 (76.4)                                 | <0.001     | 92 (23.1)                         | <0.001     |
|                                  | <b>Pap smear results</b>             |                                           |                                            |            |                                   |            |
|                                  | NILM                                 | 6 (0.7)                                   | 8 (1.1)                                    |            | 17 (4.3)                          |            |
|                                  | LSIL                                 | 141 (15.5)                                | 125 (17.4)                                 |            | 79 (20.0)                         |            |
|                                  | ASCUS                                | 19 (2.1)                                  | 34 (4.7)                                   |            | 4 (1.0)                           |            |
|                                  | HSIL                                 | 678 (74.7)                                | 478 (66.4)                                 |            | 263 (66.4)                        |            |
|                                  | ASC-H                                | 63 (6.9)                                  | 65 (9.0)                                   |            | 27 (6.8)                          |            |
| Carcinoma                        | 1 (0.1)                              | 10 (1.4)                                  | <0.001                                     | 6 (1.5)    | <0.001                            |            |
|                                  | <b>Pap smear risk categories</b>     |                                           |                                            |            |                                   |            |
|                                  | NILM, LSIL or ACSUS                  | 166 (18.3)                                | 167 (23.2)                                 |            | 100 (25.3)                        |            |
|                                  | HSIL, ASC-H or carcinoma             | 742 (81.7)                                | 553 (76.8)                                 | 0.015      | 296 (74.8)                        | 0.44       |



|                           |                                         |            |            |      |            |        |
|---------------------------|-----------------------------------------|------------|------------|------|------------|--------|
| Cervical cancer diagnosis | <b>Procedure during colposcopy</b>      |            |            |      |            |        |
|                           | Visual inspection only                  | 37 (4.1)   | 37 (5.2)   |      | 63 (15.9)  |        |
|                           | Lletz                                   | 337 (37.2) | 258 (35.9) |      | 231 (58.2) |        |
|                           | Biopsy                                  | 526 (58.0) | 420 (58.4) |      | 90 (22.7)  |        |
|                           | Other                                   | 7 (0.8)    | 4 (0.6)    | 0.69 | 13 (3.3)   | <0.001 |
|                           | <b>Histology result<sup>&amp;</sup></b> |            |            |      |            |        |
|                           | Normal                                  | 27 (3.1)   | 30 (4.4)   |      | 45 (13.8)  |        |
|                           | CIN I                                   | 254 (29.3) | 200 (29.3) |      | 84 (25.7)  |        |
|                           | CIN II                                  | 298 (34.3) | 209 (30.7) |      | 99 (30.3)  |        |
|                           | CIN III                                 | 236 (27.2) | 198 (29.0) |      | 86 (26.3)  |        |
|                           | Carcinoma                               | 3 (0.4)    | 9 (1.3)    |      | 2 (0.6)    |        |
|                           | Other <sup>*</sup>                      | 34 (3.9)   | 19 (2.8)   |      | 2 (0.6)    |        |
|                           | Invalid specimen                        | 16 (1.8)   | 17 (2.5)   | 0.10 | 9 (2.8)    | <0.001 |

$\chi^2$  test for categorical variables or Wilcoxon Rank-sum test for continuous variables. <sup>†</sup>Of those with a known HIV status. <sup>%</sup>Of those HIV positive. <sup>&</sup>Of those with a histology specimen taken at biopsy, Lletz or other procedure. Charlotte Maxeke Johannesburg Academic Hospital (CMJAH). Hillbrow Community Health Centre (HCHC). <sup>\*</sup>Other includes infections such as cervicitis, inflammation and dysplasia

Almost half of the women at CMJAH had a delay in receiving colposcopy (>6 months between Pap smear and colposcopy) post-decentralisation, compared to about a third pre-decentralisation (47.3% versus 36.2%,  $p < 0.001$ ; Figure 1: Graph 1A). At HCHC, 21.7% of women had a colposcopy within three months of a Pap smear being taken (versus 11.8% at CMJAH pre- and 15.4% post-decentralisation,  $p < 0.001$ ).

Of all Pap smears done in the JHD in the two years after decentralisation (114,983), 1.9% were done at HCHC (2227). Overall, 18.0% Pap smears done at HCHC had abnormal cytology and required colposcopy ( $n = 401$ ), compared to only 8.2% of other women in JHD as a whole ( $n = 1826$ ;  $p < 0.001$ ) (Table 2).

The estimated colposcopy coverage among women who had an abnormal Pap smear at HCHC was 66.6% (267/401; 95%CI=61.7-71.2%).

**Table 2:** Cytology results in the City of Johannesburg in 2014-2016

| Variable n (%)                     | Johannesburg health district* (n=114,983) | Hillbrow Community Health Centre (n=2227) | <i>P</i> |
|------------------------------------|-------------------------------------------|-------------------------------------------|----------|
| <b>Pap smear results</b>           |                                           |                                           |          |
| NILM                               | 74,969 (65.2)                             | 852 (38.3)                                |          |
| LSIL                               | 23,212 (20.2)                             | 790 (35.5)                                |          |
| ASCUS                              | 7391 (6.4)                                | 184 (8.3)                                 |          |
| HSIL                               | 7808 (6.8)                                | 364 (16.3)                                |          |
| ASC-H                              | 1221 (1.1)                                | 28 (1.3)                                  |          |
| Carcinoma                          | 382 (0.3)                                 | 9 (0.4)                                   | <0.001   |
| <b>Number requiring colposcopy</b> |                                           |                                           |          |
| No (NILM, LSIL or ASCUS)           | 105,572 (91.8)                            | 9411 (82.0)                               |          |
| Yes (HSIL, ASC-H or carcinoma)     | 1826 (8.2)                                | 401 (18.0)                                | <0.001   |

Data from the National Health Laboratory Service. Excludes invalid or missing specimens, and other Pap smear results (n=2446).

\*District total excludes HCHC

### Characteristics of women in the three groups

The proportion of women older than 45 years pre-decentralisation at CMJAH was 20.5%, post-decentralisation at CMJAH 30.6% and at HCHC 21.9% ( $p < 0.001$ ). At CMJAH, more women had a known HIV status pre-decentralisation than post-decentralisation (71.4% versus 59.5%,  $p < 0.001$ ). All women at HCHC had a documented HIV status. Around 85% of women with a

1  
2  
3  
4 known HIV status were HIV positive in all three groups. The proportion of  
5  
6 positive women receiving ART rose in the second period at CMJAH from  
7  
8 78.7% to 87.6% ( $p < 0.001$ ), and almost all positive women were on ART at  
9  
10 HCHC (99.7%;  $p < 0.001$ ). (Table 1)  
11  
12  
13  
14

### 15 **Description of colposcopy procedures and histology findings**

16  
17  
18 At CMJAH, in both periods, nearly 60% of women had a biopsy at colposcopy  
19  
20 (58.2%), while the same proportion had a Lletz at HCHC (58.2%). Three  
21  
22 women who had a colposcopy at HCHC were referred to CMJAH due to an  
23  
24 unsuccessful procedure.  
25  
26  
27  
28  
29

30  
31 Women at HCHC were 3.5 fold more likely to have a normal result on  
32  
33 histology than women at CMJAH (95% CI OR=2.1-5.7). Post-decentralisation,  
34  
35 29.0% of women at CMJAH and 26.3% at HCHC had CIN III lesions ( $p = 0.37$ ;  
36  
37 Figure 1: Graph1B). Post-decentralisation, 11 women had a diagnosis of  
38  
39 carcinoma on histology (1.1%), compared to 3 before decentralisation (0.4%;  
40  
41  $p = 0.06$ ). The proportion of invalid specimens was similar across the three  
42  
43 groups, ranging from 1.8 to 2.8%.  
44  
45  
46  
47  
48  
49

### 50 **DISCUSSION**

51  
52  
53 In this study we determined whether decentralisation to primary care level  
54  
55 improved access to colposcopy services by reviewing the number of women  
56  
57  
58  
59  
60

1  
2  
3  
4 attending the service before and after decentralisation, and the coverage of  
5  
6 colposcopy among women at HCHC. We found that the cumulative number of  
7  
8 colposcopies across the two facilities rose following decentralisation, and after  
9  
10 only two years, HCHC was responsible for a third of all colposcopies in the  
11  
12 sub-district, even though it performs a negligible number of Pap smears  
13  
14 relative to other sites. Overall, following decentralisation, three fold more  
15  
16 women who had a Pap smear at HCHC had a colposcopy, and at CMJAH, the  
17  
18 proportion of women from HCHC reduced almost threefold. The marked  
19  
20 increase in number of women from HCHC who had a colposcopy indicates  
21  
22 that prior to decentralisation there may have been a large unmet need for the  
23  
24 service, which was now being addressed, at least in part. The coverage  
25  
26 reached 66.6%, considerably higher than figures in other settings.  
27  
28  
29  
30  
31  
32  
33  
34  
35  
36  
37

38 Decentralisation of colposcopy services to primary level care has several  
39  
40 potential benefits. Firstly, with adequate training, tasks that had been  
41  
42 performed by highly specialised staff can be shifted to lower health worker  
43  
44 cadres, allowing specialists to focus on more complex cases.[21] Also,  
45  
46 decentralisation may alleviate patient barriers to access, by bringing services  
47  
48 closer to them – in settings they are familiar with – and reducing their transport  
49  
50 and other costs.[11, 21] Decentralisation has long been central to the provision  
51  
52 of HIV services in this setting through, for example, task shifting, providing  
53  
54  
55  
56  
57  
58  
59  
60

1  
2  
3  
4 antiretroviral treatment in primary care services and the dispensing of drugs  
5  
6 from local pharmacies, rather than clinics.[22] Integration with HIV and ART  
7  
8 services is beneficial to women as it reduces opportunity costs associated with  
9  
10 multiple visits to the clinic and lowers the risk of loss to follow up.  
11  
12  
13  
14

15 Decentralisation of colposcopy can take several forms, including  
16  
17 telecolposcopy from distant sites, outreach portable colposcopy, shifting of  
18  
19 services to nurse practitioners or medical officers, and decentralisation to  
20  
21 lower level facilities, as in this study.[23] In other settings, shifting services to  
22  
23 lower care levels was found to be cost-effective, acceptable to patients and to  
24  
25 increase rates of attendance for colposcopy.[14, 23, 24] In the Western Cape,  
26  
27 South Africa, for example, colposcopy services were decentralised to a district  
28  
29 hospital and provided by a gynaecologist.[21] This raised uptake of the service  
30  
31 and reduced time to procedure. In high-income countries, services have been  
32  
33 successfully decentralised to community health centres and portable outreach  
34  
35 programmes in Alaska, the United States, and parts of Canada and Australia,  
36  
37 targeting immigrant, Inuit and other vulnerable women.[14, 15, 24-26] The  
38  
39 National Health Service in United Kingdom has gone a step further and  
40  
41 colposcopy is often performed by nurse practitioners once they have  
42  
43 completed certification procedures.[27]  
44  
45  
46  
47  
48  
49  
50  
51  
52  
53  
54  
55  
56  
57  
58  
59  
60

1  
2  
3  
4 Women attending HCHC colposcopy were at lower risk than those at CMJAH,  
5  
6 as shown by their lower grades of abnormalities on Pap smear and histology.  
7

8  
9 Women at HCHC were also younger than those at CMJAH, important as risk  
10  
11 for cervical cancer rises considerably with age (the mean age at diagnosis of  
12  
13 cervical cancer is 52.3 in South Africa).[28] These findings may suggest that,  
14  
15 as the programme had envisaged, higher-risk patients are being referred to  
16  
17 CMJAH. Overall, services at HCHC appear to be performing well, with all  
18  
19 women tested for HIV and almost all those positive were receiving ART. In  
20  
21 addition, colposcopy services were now integrated into their care, which was  
22  
23 previously off-site, complex to access and marked by lengthy delays. HIV-  
24  
25 positive women made up the large majority of patients in all groups, reflecting  
26  
27 the higher levels of risk for cervical cancer in this population. Clearly it remains  
28  
29 a priority to integrate screening for cervical cancer within all clinics providing  
30  
31 antiretroviral treatment.  
32  
33  
34  
35  
36  
37  
38  
39  
40  
41  
42  
43

44 The similar number of invalid histology samples and the isolated cases of  
45  
46 failed colposcopy suggests that the quality of colposcopy services at HCHC  
47  
48 may have been comparable to CMJAH. Unlike at CMJAH, however, Lletz was  
49  
50 the commonest procedure at HCHC, in keeping with evidence that Lletz is  
51  
52 better suited to lower level facilities and staff.[9] With decentralisation, it is  
53  
54 critical to ensure that staff are adequately trained and service quality is closely  
55  
56  
57  
58  
59  
60

1  
2  
3 monitored. The hesitancy to decentralise colposcopy to date, may reflect  
4  
5  
6 underlying concerns that cases of cancer may go undetected by lower-level  
7  
8  
9 staff. In some settings, lower-level health workers undergo a process of  
10  
11  
12 certification and have to perform a certain number of colposcopies per year to  
13  
14  
15 remain registered.[27] While this approach may hold advantages, onerous  
16  
17  
18 processes around certification and recertification may lead to staff  
19  
20  
21 discontinuing colposcopy.[29]

22  
23  
24 The decline in number of colposcopies at CMJAH is concerning, and may  
25  
26  
27 reflect factors other than a reduction in demand that accompanies  
28  
29  
30 decentralisation. Fewer women at the site had a known HIV status and waiting  
31  
32  
33 times for colposcopy lengthened. Thus, though decentralisation can reduce  
34  
35  
36 the patient burden at referral centres, this does not necessarily translate into  
37  
38  
39 improved services at that site. Other factors may play a larger influence, for  
40  
41  
42 example, coinciding with the period after decentralisation, CMJAH lost a  
43  
44  
45 number of senior specialists.

46  
47  
48 Delays in colposcopy vary considerably between settings, from an average of  
49  
50  
51 39 days from referral to colposcopy in one study in KwaZulu Natal, South  
52  
53  
54 Africa,[10] to around 5-6 months in both our study and another in the Western  
55  
56  
57 Cape.[21] It is concerning that time from Pap smear to colposcopy is greater  
58  
59  
60 than six months for half the women at CMJAH, and a third at HCHC. Reducing

1  
2  
3  
4 these delays is clearly a priority at both sites. We were unable, however, to  
5  
6 discern reasons for these delays, which could be caused by delays in  
7  
8 providing the results of Pap smears to patients, patient delays in making or  
9  
10 attending appointments, or shortages of specialist staff. We could also not  
11  
12 investigate which group of patients required referral to higher levels of care,  
13  
14 and future studies might attempt to define criteria for referral. Moreover, given  
15  
16 the relatively short period of the review, we are unable to assess sustainability  
17  
18 of the services in the long-run, a pressing question. Lastly, the study evaluated  
19  
20 the use of colposcopy following cytological screening with Pap smears and  
21  
22 these findings may not be generalizable to screening with HPV testing, which  
23  
24 is increasingly being used in many countries.[30] HPV testing has a  
25  
26 considerably higher sensitivity for detecting precursor lesions of cervical  
27  
28 cancer compared to cytology, and thus may alter the number of patients  
29  
30 requiring colposcopy and types of lesions identified.[31, 32]  
31  
32  
33  
34  
35  
36  
37  
38  
39  
40  
41  
42  
43  
44  
45  
46

## 47 CONCLUSION

48  
49  
50  
51 In conclusion, decentralisation of colposcopy services can improve access to  
52  
53 colposcopy, resulting in faster diagnoses of precancerous lesions of the cervix,  
54  
55 more lesions being treated with LLETZ and a reduction in the burden of patients  
56  
57 in tertiary hospitals. Most importantly, increasing the number of colposcopies  
58  
59  
60



1  
2  
3  
4 and treatments of precancerous lesions could reduce the incidence of cervical  
5  
6 cancer. This is particularly important among HIV-positive women who now live  
7  
8 longer with ART, and the treatment of their co-morbidities is rapidly gaining in  
9  
10 importance. Though coverage of colposcopy reached two thirds at HCHC, it is  
11  
12 important to identify interventions to further raise coverage levels.  
13  
14  
15  
16

17  
18 Decentralisation is unlikely to affect the quality of services if medical officers  
19  
20 are appropriately trained, supervised and supported by clear referral  
21  
22 guidelines. The approach presented here could be extended to other primary-  
23  
24 or secondary-level facilities in South Africa, and perhaps encompass the use  
25  
26 of portable colposcopes or telecolposcopy, under close supervision. If done  
27  
28 correctly and at scale, decentralisation of colposcopy services, could shore up  
29  
30 cervical cancer prevention and finally decrease the public health burden and  
31  
32 mortality due to the cancer.  
33  
34  
35  
36  
37  
38  
39  
40  
41  
42  
43

## 44 **ACKNOWLEDGEMENTS**

45  
46  
47  
48 We would like to acknowledge the following persons who contributed to this  
49  
50 study:  
51  
52  
53

54 H. Manyonga, Z. Dumakude, A. Moholola, N. Wattrus, L. Mbuyisa, I. Sishi, N.

55  
56  
57 Twala, S. Sidabuka, E. Briedenhann, L. Mavuya, K. Moshaba, S. Mzobe, S.  
58  
59  
60

1  
2  
3 Carmona (NHLS), L. Chauke (Department of Obstetrics and Gynaecology,  
4  
5  
6 CMJAH).  
7  
8  
9

## 10 11 12 13 **FUNDING** 14

15  
16  
17 This study has been made possible through funding from USAID-PEPFAR,  
18  
19 grant number: AID-A-12-67400021. We would also like to acknowledge the  
20  
21 following organizations for donating a colposcopy machine to Hillbrow CHC:  
22  
23 Vodacom, Altech and Altron.  
24  
25  
26  
27

## 28 29 **COMPETING INTERESTS** 30

31  
32 All authors listed in this study do not have competing interests to declare.  
33  
34  
35  
36  
37  
38

## 39 40 **DATA SHARING STATEMENT** 41

42  
43 There's no additional unpublished data from the study.  
44  
45  
46  
47  
48  
49

## 50 51 **AUTHOR CONTRIBUTIONS** 52

53  
54 **Manuscript title:** Decentralising colposcopy services raises access to treatment  
55  
56 of abnormal cervical smears: a pilot in an inner-city clinic in Johannesburg,  
57  
58 South Africa  
59  
60

1  
2  
3  
4 **Category 1**  
5  
6

7 **Conception and design of study:** G. Maimela\*1, X. Nene\*1, S. Sawry, N.

8  
9  
10 Mvundla, M. Chersich  
11

12  
13 **Acquisition of data:** G. Maimela, X. Nene, N. Mvundla,  
14

15  
16  
17 **Analysis and/or interpretation of data:** G. Maimela, X. Nene, S. Sawry, E.

18  
19 Kachingwe, M. Chersich, H. Rees; T. Smith.  
20  
21

22  
23 **Category 2**  
24

25  
26  
27 **Drafting the manuscript:** G. Maimela, X. Nene, N. Mvundla, S. Sawry, E.

28  
29 Kachingwe, M. Chersich.  
30  
31

32  
33 **Revising the manuscript critically for important intellectual content:** M.

34  
35  
36 Chersich, H. Rees, T. Smith  
37  
38

39 **Category 3**  
40

41  
42  
43 **Approval of the version of the manuscript to be published:**  
44

45  
46 G. Maimela\*1, X. Nene\*1, N. Mvundla1, S. Sawry1, T. Smith2, H. Rees1,

47  
48  
49 E.Kachingwe1, M. Chersich1  
50  
51  
52  
53  
54  
55  
56  
57  
58  
59  
60

1  
2  
3  
4 **Acknowledgements:** *All persons who have made substantial contributions to*  
5  
6 *the work reported in the manuscript (e.g., technical help, writing and editing*  
7  
8 *assistance, general support), but who do not meet the criteria for authorship,*  
9  
10 *are named in the Acknowledgements and have given us their written*  
11  
12 *permission to be named. If we have not included an Acknowledgements, then*  
13  
14 *that indicates that we have not received substantial contributions from non-*  
15  
16 *authors.*  
17  
18  
19  
20  
21  
22  
23

24 H. Manyonga, Z. Dumakude, A. Moholola, N. Wattrus, L. Mbuyisa, I. Sishi, N.  
25  
26 Twala, S. Sidabuka, E. Briedenhann, L. Mavuya, K. Moshaba, S. Mzobe, S.  
27  
28 Carmona (NHLS), L. Chauke (Department of Obstetrics and Gynaecology,  
29  
30 CMJAH).  
31  
32  
33  
34  
35

36 This statement is signed by all the authors (a photocopy of this form may be  
37  
38 used if there are more than 10 authors):  
39  
40  
41

## 42 REFERENCES

- 43  
44  
45  
46 1. WHO. Cervical Cancer: An NCD We Can Overcome: Call to Action. 2018.  
47 [http://www.who.int/reproductivehealth/DG\\_Call-to-Action.pdf](http://www.who.int/reproductivehealth/DG_Call-to-Action.pdf)  
48  
49 2. Bruni L, Barrionuevo-Rosas L, Albero G, Serrano B, Mena M, Gómez D, et al.  
50 ICO/IARC Information Centre on HPV and Cancer (HPV Information Centre). Human  
51 Papillomavirus and Related Diseases in the World. Summary Report 27 July 2017.  
52 <http://www.hpvcentre.net/statistics/reports/XWX.pdf>  
53  
54 3. Batra P, Kuhn L, Denny L. Utilisation and outcomes of cervical cancer  
55 prevention services among HIV-infected women in Cape Town. SAMJ: South African  
56 Medical Journal. 2010;100:39-44.  
57  
58  
59  
60

- 1  
2  
3  
4 4. ICO/IARC Information Centre on HPV and Cancer. South Africa Human  
5 Papillomavirus and Related Cancers, Fact Sheet 2017. 2017.  
6 [http://www.hpvcentre.net/statistics/reports/ZAF\\_FS.pdf](http://www.hpvcentre.net/statistics/reports/ZAF_FS.pdf)  
7
- 8  
9 5. Shisana O, Rehle T, Simbayi LC, Zuma K, Jooste S, Zungu N, et al. South  
10 African National HIV Prevalence, Incidence and Behaviour Survey, 2012. Cape  
11 Town: HSRC Press: 2014.  
12
- 13  
14 6. Adler D, Wallace M, Bennie T, Abar B, Sadeghi R, Meiring T, et al. High risk  
15 human papillomavirus persistence among HIV-infected young women in South  
16 Africa. *International journal of infectious diseases : IJID : official publication of the*  
17 *International Society for Infectious Diseases.* 2015;33:219-21. Epub 2015/02/24.  
18
- 19  
20 7. Guiguet M, Boue F, Cadranel J, Lang JM, Rosenthal E, Costagliola D, et al.  
21 Effect of immunodeficiency, HIV viral load, and antiretroviral therapy on the risk of  
22 individual malignancies (FHDH-ANRS CO4): a prospective cohort study. *Lancet*  
23 *Oncol.* 2009;10(12):1152-9. Epub 2009/10/13.  
24
- 25  
26 8. National Department of Health South Africa. Cervical Cancer Prevention and  
27 Control Policy. 2017.  
28
- 29  
30 9. WHO. WHO guidelines for screening and treatment of precancerous lesions  
31 for cervical cancer prevention. 2013.  
32  
33 [http://apps.who.int/iris/bitstream/handle/10665/94830/9789241548694\\_eng.pdf;jsessi](http://apps.who.int/iris/bitstream/handle/10665/94830/9789241548694_eng.pdf;jsessionid=F65ED4960A15E4D16BB15F6E57F71518?sequence=1)  
34 [onid=F65ED4960A15E4D16BB15F6E57F71518?sequence=1](http://apps.who.int/iris/bitstream/handle/10665/94830/9789241548694_eng.pdf;jsessionid=F65ED4960A15E4D16BB15F6E57F71518?sequence=1)  
35  
36
- 37  
38 10. Katz IT, Butler LM, Crankshaw TL, Wright AA, Bramhill K, Leone DA, et al.  
39 Cervical Abnormalities in South African Women Living With HIV With High Screening  
40 and Referral Rates. *J Glob Oncol.* 2016;2(6):375-80.  
41
- 42  
43 11. Dawood S. Barriers and Facilitators to Colposcopy Attendance. Following an  
44 Abnormal Pap Smear: Patient and Provider Perspectives. Cape Town: University of  
45 Cape Town; 2014.  
46
- 47  
48 12. Momberg M, Botha MH, Van der Merwe FH, Moodley J. Women's  
49 experiences with cervical cancer screening in a colposcopy referral clinic in Cape  
50 Town, South Africa: a qualitative analysis. *BMJ open.* 2017;7(2):e013914. Epub  
51 2017/02/19.  
52
- 53  
54 13. Hoque M, Hoque E, Kader SB. Evaluation of cervical cancer screening  
55 program at a rural community of South Africa. *East African journal of public health.*  
56 2008;5(2):111-6. Epub 2008/11/26.  
57  
58  
59  
60

- 1  
2  
3  
4 14. Martin B, Smith W, Orr P, Guijon F. Investigation and management of cervical  
5 intraepithelial neoplasia in Canadian Inuit: enhancing access to care. *Arctic Med*  
6 *Res.* 1995;54 Suppl 1:117-21.
- 7  
8  
9 15. Payne S, Jarrett N, Jeffs D. The impact of travel on cancer patients'  
10 experiences of treatment: a literature review. *Eur J Cancer Care (Engl)*.  
11 2000;9(4):197-203.
- 12  
13  
14 16. Baranoski AS, Stier EA. Factors associated with time to colposcopy after  
15 abnormal Pap testing in HIV-infected women. *Journal of women's health (2002)*.  
16 2012;21(4):418-24. Epub 2011/12/07.
- 17  
18  
19 17. Rees H, Delany-Moretlwe S, Scorgie F, Luchters S, Chersich MF. At the Heart  
20 of the Problem: Health in Johannesburg's Inner-City. *BMC Public Health*.  
21 2017;17(Suppl 3):554.
- 22  
23  
24 18. Stadler J, Chikandiwe A, Mayaud P, Rees H, Imrie J, Delany-Moretlwe S.  
25 Biographies of HIV and Cervical Cancer: Understanding Treatment-Seeking  
26 Amongst HIV Positive Women in Inner City Johannesburg. IAS conference, Durba,  
27 South Africa, Oral presentation. 2016.
- 28  
29  
30 19. Botha MH. Guidelines for cervical cancer screening in South Africa. *Southern*  
31 *African Journal of Gynaecological Oncology* 2017;9(1):8-12.
- 32  
33  
34 20. Harris PA, Taylor R, Thielke R, Payne J, Gonzalez N, Conde JG. Research  
35 electronic data capture (REDCap)--a metadata-driven methodology and workflow  
36 process for providing translational research informatics support. *J Biomed Inform*.  
37 2009;42(2):377-81. Epub 2008/10/22.
- 38  
39  
40 21. Blanckenberg ND, Oettle CA, Conradie HH, Krige FK. Impact of introduction  
41 of a colposcopy service in a rural South African sub-district on uptake of colposcopy.  
42 *South African Journal of Obstetrics and Gynaecology*. 2013;19(3).
- 43  
44  
45 22. Callaghan M, Ford N, Schneider H. A systematic review of task- shifting for  
46 HIV treatment and care in Africa. *Human resources for health*. 2010;8:8. Epub  
47 2010/04/02.
- 48  
49  
50 23. Bishai DM, Ferris DG, Litaker MS. What is the least costly strategy to evaluate  
51 cervical abnormalities in rural women? Comparing telemedicine, local practitioners,  
52 and expert physicians. *Med Decis Making*. 2003;23(6):463-70.
- 53  
54  
55  
56  
57  
58  
59  
60

- 1  
2  
3  
4 24. Ogilvie GS, Shaw EA, Lusk SP, Zazulak J, Kaczorowski JA. Access to  
5 colposcopy services for high-risk Canadian women: can we do better? *Can J Public*  
6 *Health*. 2004;95(5):346-51.  
7  
8  
9 25. Gifford MS, Stone IK. Quality, access, and clinical issues in a nurse  
10 practitioner colposcopy outreach program. *The Nurse practitioner*. 1993;18(10):25-9,  
11 33-6. Epub 1993/10/01.  
12  
13  
14 26. Hartz LE. Quality of care by nurse practitioners delivering colposcopy  
15 services. *J Am Acad Nurse Pract*. 1995;7(1):23-7.  
16  
17 27. Public Health England, National Health Service. NHS Cervical Screening  
18 Programme Colposcopy and Programme Management. NHSCSP Publication  
19 number 20. Third edition. 2016.  
20  
21  
22 [https://assets.publishing.service.gov.uk/government/uploads/system/uploads/attach](https://assets.publishing.service.gov.uk/government/uploads/system/uploads/attachment_data/file/515817/NHSCSP_colposcopy_management.pdf)  
23 [ment\\_data/file/515817/NHSCSP\\_colposcopy\\_management.pdf](https://assets.publishing.service.gov.uk/government/uploads/system/uploads/attachment_data/file/515817/NHSCSP_colposcopy_management.pdf)  
24  
25  
26 28. Olorunfemi G, Ndlovu N, Masukume G, Chikandiwa A, Pisa PT, Singh E.  
27 Temporal trends in the epidemiology of cervical cancer in South Africa (1994-2012).  
28 *Int J Cancer*. 2018;143(9):2238-49.  
29  
30  
31 29. Sonnex C. Providing a genitourinary medicine colposcopy service. *Sexually*  
32 *transmitted infections*. 2014;90(1):8-10. Epub 2013/07/31.  
33  
34  
35 30. Public Health England. NHS Cervical Screening Programme: Colposcopy and  
36 Programme Management. NHSCSP Publication number 20. Third Edition. 2016.  
37  
38 [https://assets.publishing.service.gov.uk/government/uploads/system/uploads/attach](https://assets.publishing.service.gov.uk/government/uploads/system/uploads/attachment_data/file/515817/NHSCSP_colposcopy_management.pdf)  
39 [ment\\_data/file/515817/NHSCSP\\_colposcopy\\_management.pdf](https://assets.publishing.service.gov.uk/government/uploads/system/uploads/attachment_data/file/515817/NHSCSP_colposcopy_management.pdf)  
40  
41  
42 31. Dijkstra MG, Snijders PJ, Arbyn M, Rijkaart DC, Berkhof J, Meijer CJ. Cervical  
43 cancer screening: on the way to a shift from cytology to full molecular screening. *Ann*  
44 *Oncol*. 2014;25(5):927-35. Epub 2014/01/22.  
45  
46  
47 32. Wright TC, Jr., Stoler MH, Behrens CM, Sharma A, Sharma K, Apple R.  
48 Interlaboratory variation in the performance of liquid-based cytology: insights from  
49 the ATHENA trial. *Int J Cancer*. 2014;134(8):1835-43. Epub 2013/10/15.  
50  
51  
52  
53  
54  
55  
56  
57  
58  
59  
60

1  
2  
3  
4  
5  
6  
7  
8  
9  
10  
11  
12  
13  
14  
15  
16  
17  
18  
19  
20  
21  
22  
23  
24  
25  
26  
27  
28  
29  
30  
31  
32

## FIGURE LEGENDS

33  
34  
35  
36

Figure 1:

37  
38  
39  
40  
41  
42

Graph 1A: Total number of colposcopies done before and after  
decentralisation

43  
44  
45  
46  
47  
48  
49

Graph 1B: Number of cervical intraepithelial neoplasia lesions detected before  
and after decentralisation



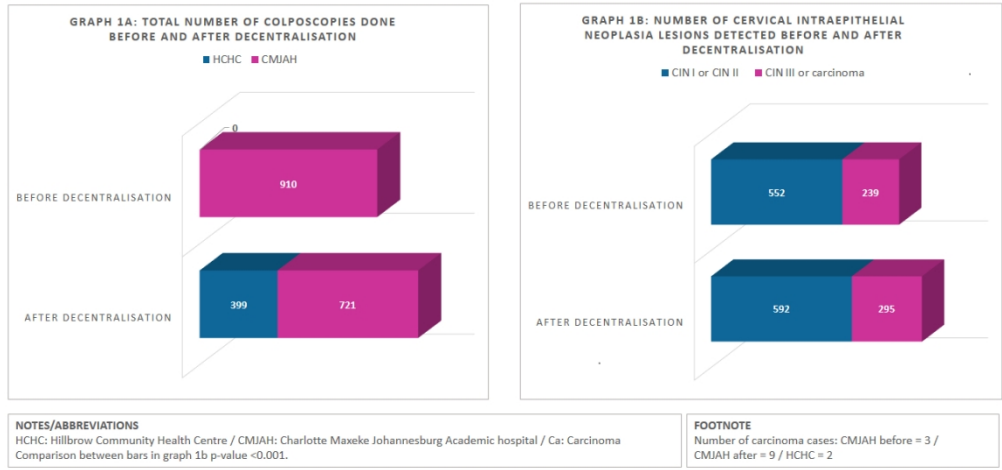

Figure 1:  
Graph 1A: Total number of colposcopies done before and after decentralisation  
Graph 1B: Number of cervical intraepithelial neoplasia lesions detected before and after decentralisation

271x128mm (120 x 120 DPI)

# BMJ Open

## The impact of decentralising colposcopy services from tertiary- to primary-level care in inner-city Johannesburg, South Africa: a before and after study

|                                 |                                                                                                                                                                                                                                                                                                                                                                                                                                                                                                                                                                                                                                                                                                                                                                                                                                                                                                                                                                                                                             |
|---------------------------------|-----------------------------------------------------------------------------------------------------------------------------------------------------------------------------------------------------------------------------------------------------------------------------------------------------------------------------------------------------------------------------------------------------------------------------------------------------------------------------------------------------------------------------------------------------------------------------------------------------------------------------------------------------------------------------------------------------------------------------------------------------------------------------------------------------------------------------------------------------------------------------------------------------------------------------------------------------------------------------------------------------------------------------|
| Journal:                        | <i>BMJ Open</i>                                                                                                                                                                                                                                                                                                                                                                                                                                                                                                                                                                                                                                                                                                                                                                                                                                                                                                                                                                                                             |
| Manuscript ID                   | bmjopen-2018-024726.R2                                                                                                                                                                                                                                                                                                                                                                                                                                                                                                                                                                                                                                                                                                                                                                                                                                                                                                                                                                                                      |
| Article Type:                   | Research                                                                                                                                                                                                                                                                                                                                                                                                                                                                                                                                                                                                                                                                                                                                                                                                                                                                                                                                                                                                                    |
| Date Submitted by the Author:   | 14-Jan-2019                                                                                                                                                                                                                                                                                                                                                                                                                                                                                                                                                                                                                                                                                                                                                                                                                                                                                                                                                                                                                 |
| Complete List of Authors:       | Maimela, Gloria; University of the Witwatersrand, Wits Reproductive Health and HIV Institute, Faculty of Health Sciences<br>Nene, Xolisile; University of the Witwatersrand , Wits Reproductive Health and HIV Institute, Faculty of Health Sciences<br>Mvundla, Nontuthuko; University of the Witwatersrand , Wits Reproductive Health and HIV Institute, Faculty of Health Sciences<br>Sawry, Shobna; University of the Witwatersrand , Wits Reproductive Health and HIV Institute, Faculty of Health Sciences<br>Smith, Trudy; University of the Witwatersrand , Wits Donald Gordon Medical Centre, Faculty of Health Sciences<br>Rees, Helen; University of the Witwatersrand , Wits Reproductive Health and HIV Institute, Faculty of Health Sciences<br>Kachingwe, Elizabeth; University of the Witwatersrand , Wits Reproductive Health and HIV Institute, Faculty of Health Sciences<br>Chersich, Matthew; University of the Witwatersrand , Wits Reproductive Health and HIV Institute, Faculty of Health Sciences |
| <b>Primary Subject Heading</b>: | Public health                                                                                                                                                                                                                                                                                                                                                                                                                                                                                                                                                                                                                                                                                                                                                                                                                                                                                                                                                                                                               |
| Secondary Subject Heading:      | Diagnostics, Obstetrics and gynaecology, Oncology, Reproductive medicine                                                                                                                                                                                                                                                                                                                                                                                                                                                                                                                                                                                                                                                                                                                                                                                                                                                                                                                                                    |
| Keywords:                       | Colposcopy < GYNAECOLOGY, Community gynaecology < GYNAECOLOGY, Gynaecological oncology < GYNAECOLOGY, Minimally invasive surgery < GYNAECOLOGY, PRIMARY CARE, Decentralised Care                                                                                                                                                                                                                                                                                                                                                                                                                                                                                                                                                                                                                                                                                                                                                                                                                                            |
|                                 |                                                                                                                                                                                                                                                                                                                                                                                                                                                                                                                                                                                                                                                                                                                                                                                                                                                                                                                                                                                                                             |

SCHOLARONE™  
Manuscripts

1  
2  
3  
4 **Title:** The impact of decentralising colposcopy services from tertiary- to  
5  
6 primary-level care in inner-city Johannesburg, South Africa: a before and after  
7  
8 study  
9  
10

11  
12 **Authors:** G. Maimela\*<sup>1</sup>, X. Nene\*<sup>1</sup>, N. Mvundla<sup>1</sup>, S. Sawry<sup>1</sup>, T. Smith<sup>2</sup>, H.  
13  
14 Rees<sup>1</sup>, E.Kachingwe<sup>1</sup>, M. Chersich<sup>1</sup>  
15  
16

17  
18  
19 **Affiliations:**  
20  
21

- 22  
23 1. Wits Reproductive Health and HIV Institute, Faculty of Health Sciences,  
24  
25 University of the Witwatersrand, South Africa  
26  
27  
28 2. Department of Obstetrics and Gynaecology, School of Clinical  
29  
30 Medicine, Charlotte Maxeke Johannesburg Academic Hospital, Faculty  
31  
32 of Health Sciences, University of the Witwatersrand, South Africa  
33  
34  
35

36  
37 **Corresponding author:** Gloria Maimela, [GMaimela@wrhi.ac.za](mailto:GMaimela@wrhi.ac.za), Wits  
38  
39  
40 Reproductive Health and HIV Institute, Faculty of Health Sciences, University  
41  
42 of the Witwatersrand, South Africa  
43  
44  
45  
46  
47  
48  
49  
50  
51  
52  
53  
54  
55  
56  
57  
58  
59  
60

## ABSTRACT

**Objective:** To assess whether decentralising colposcopy services to a primary care facility in inner-city Johannesburg, South Africa raises access to colposcopy.

**Design:** Before-after study comparing two years before and two after decentralisation, using clinical records, and laboratory data on cervical cytology and histology.

**Primary outcome:** The proportion of all women attending Hillbrow Community Health Centre (HCHC) with an abnormal Pap smear who had a colposcopy post-decentralisation.

**Setting:** Charlotte Maxeke Johannesburg Academic Hospital (CMJAH) has provided colposcopy services for several decades. HCHC, located about 3km away, began colposcopy services in 2014.

**Participants:** Women, aged above 18 years, who had a colposcopy for diagnosis and treatment of precancerous cervical lesions following a Pap smear, from 2012-2016 at CMJAH or HCHC.

**Results:** Pre-decentralisation at CMJAH, 910 women had colposcopy (2012-2014). Post-decentralisation (2014-2016), 721 had colposcopy at CMJAH and 399 at HCHC, the decentralised facility. The number who had a Pap smear at

1  
2  
3  
4 HCHC and then a colposcopy rose three-fold post-decentralisation (114  
5  
6 versus 350). Post-decentralisation, 43 women at HCHC were referred from  
7  
8  
9 CMJAH for colposcopy, compared to 114 pre-decentralisation. Post-  
10  
11  
12 decentralisation, 47.3% of women at CMJAH waited >6 months for  
13  
14  
15 colposcopy, while 35.5% did at HCHC ( $p<0.001$ ). Across all three groups,  
16  
17  
18 26.9-30.3% of women had CIN III lesions or carcinoma on colposcopy. The  
19  
20  
21 proportion of invalid specimens was similar at CMJAH and HCHC (1.8-2.8%).  
22  
23  
24 Of 401 women who had an abnormal Pap smear at HCHC post-  
25  
26  
27 decentralisation, 267 had colposcopy (66.6%).  
28  
29

30 **Conclusion:** Decentralisation can decrease the time to colposcopy and reduce  
31  
32 the workload of tertiary hospitals. Overall, more women accessed services.  
33  
34  
35 Colposcopy coverage at HCHC is higher than other sites, but could be further  
36  
37  
38 improved. Decentralisation did not appear to undermine the quality of services  
39  
40  
41 and this model could be extended to similar settings in South Africa and  
42  
43  
44 elsewhere.  
45

46 **Key words:** South Africa, colposcopy, cervical cancer, primary health care,  
47  
48  
49 decentralisation  
50  
51  
52  
53  
54  
55  
56  
57  
58  
59  
60

1  
2  
3  
4  
5  
6  
7  
8  
9  
10  
11  
12  
13  
14  
15  
16  
17  
18  
19  
20  
21  
22  
23  
24  
25  
26  
27  
28  
29  
30  
31  
32  
33  
34  
35  
36  
37  
38  
39  
40  
41  
42  
43  
44  
45  
46  
47  
48  
49  
50  
51  
52  
53  
54  
55  
56  
57  
58  
59  
60

For peer review only

**ARTICLE SUMMARY**

**Strengths and limitations of this study**

- 1  
2  
3  
4 • Data were collected for the purposes of patient care, and not specifically  
5  
6 for research, potentially reducing data quality.  
7  
8  
9 • The limited data available meant that the study could not fully investigate  
10  
11 several important questions, such as reasons for delays in colposcopy or a  
12  
13 detailed assessment of the quality of decentralised services. Additionally,  
14  
15 the absence of baseline data at the primary care site does not allow us to  
16  
17 directly compare changes in access among women at the primary care site  
18  
19 over time.  
20  
21  
22  
23  
24  
25  
26 • As the study only included a single primary care centre, we are unable to  
27  
28 fully assess the potential impact of a broader decentralisation strategy. The  
29  
30 findings of this study may thus not be generalizable to a larger initiative  
31  
32 that, for example, adopted a hub and spoke approach encompassing  
33  
34 several primary care centres.  
35  
36  
37  
38  
39  
40 • Given that the study only covered the first two years after decentralisation,  
41  
42 we are unable to ascertain the intervention's long-term sustainability.  
43  
44  
45  
46 • The study strengths include a relatively large number of women in all study  
47  
48 groups, allowing us to detect differences between the time periods.  
49  
50  
51 Additionally, the hub and spoke approach has been used for several other  
52  
53 health services that similarly require an integrated tiered health care and  
54  
55 laboratory system, such as TB care and colorectal cancer screening. The  
56  
57  
58  
59  
60

1  
2  
3  
4 successful application of this approach elsewhere supports the  
5  
6 generalizability of the study findings and assertions about the validity of the  
7  
8 results reported.  
9  
10  
11  
12  
13  
14  
15  
16  
17  
18  
19  
20  
21

## 22 INTRODUCTION

23  
24 Cervical cancer is a largely preventable disease and WHO has recently  
25  
26 launched an initiative aimed at eliminating the condition.[1] At present, cervical  
27  
28 cancer is the second most common cancer among women aged 15 to 44  
29  
30 years in the world.[2] In South Africa, it is the commonest cancer in that age  
31  
32 group, and mortality rates are high.[3, 4] About 3% of women in South Africa  
33  
34 harbour cervical human papilloma virus (HPV)-16/18, which is responsible for  
35  
36 the majority of cases of cervical cancer in the country.[4] Rates of cervical  
37  
38 cancer in South Africa can partly be attributed to the high level of HIV.[5]  
39  
40 Women with HIV infection have a seven-fold higher rate of persistence of  
41  
42 high-risk HPV compared to HIV uninfected women,[6] heightening their risk for  
43  
44 incident and progressive precancerous lesions. While antiretroviral therapy  
45  
46 reduces the risk of cervical cancer and its precursors, the risk remains much  
47  
48 higher than for HIV-negative women.[7]  
49  
50  
51  
52  
53  
54  
55  
56  
57  
58  
59  
60



1  
2  
3  
4 In South Africa, the policy for cervical cancer screening was introduced in  
5  
6 2001 and updated in 2017.[8] The policy recommends that low-risk women  
7  
8 have three Pap smears in a lifetime at the ages of 30, 40 and 50 years, while  
9  
10 women with HIV-infection are to be screened every three years, regardless of  
11  
12 age. About 60% of women aged 30 to 49 years have had cervical cancer  
13  
14 screening.[9] Screening is predominately based on cytology using  
15  
16 Papanikolaou (Pap) smears, although there are plans to introduce liquid-  
17  
18 based cytology which offers the potential to do HPV screening. Women with  
19  
20 atypical findings on cytology are referred for colposcopy to establish a  
21  
22 definitive diagnosis. During colposcopy, the view of the cervix is magnified  
23  
24 and, where required, a biopsy is taken or a large loop excision of the  
25  
26 transformation zone (LLETZ) is conducted.[10]  
27  
28  
29  
30  
31  
32  
33  
34  
35  
36  
37

38 The gap between screening for cervical cancer and treatment of high-risk  
39  
40 lesions is believed to be very high in South Africa.[11] Although there are few  
41  
42 published data to support this assertion, the fact that the number of cervical  
43  
44 cancer cases remains high despite the large number of cervical cancer  
45  
46 screening procedures suggest this is the case. A range of health systems and  
47  
48 patient factors influence access to colposcopy. System barriers include a  
49  
50 limited number of colposcopy services, which are mostly centralised within  
51  
52 tertiary-level facilities, with long waiting times for patients and few  
53  
54  
55  
56  
57  
58  
59  
60

1  
2  
3 opportunities for non-specialist health workers to develop requisite skills.[12]  
4  
5

6 There are limited numbers of specialist gynaecologists within the public  
7  
8 sector, and the high demands on these doctors for emergency and curative  
9  
10 obstetric and gynaecology services may reduce their time available for  
11  
12 diagnostic or preventive interventions, such as colposcopy. Another key factor  
13  
14 is the complexity of providing Pap and other results to patients and then  
15  
16 scheduling colposcopy appointments across the disjointed systems that often  
17  
18 exist between a tertiary hospital and primary care centres.[13-15] Patient-  
19  
20 related factors linked with low uptake of colposcopy include low education  
21  
22 levels, being single, fear of HIV testing and disclosure, a low CD4 count in  
23  
24 HIV-infected women and transport costs for the additional visits.[14, 16, 17]  
25  
26 Patient demand for colposcopy is also undermined by a general fear of  
27  
28 cancer, and lack of awareness or knowledge about cervical cancer.[13, 18]  
29  
30  
31 Poor patient-provider interactions restrict access, whilst a longstanding  
32  
33 relationship with a primary clinician can optimise uptake.[18]  
34  
35  
36  
37  
38  
39  
40  
41  
42  
43  
44  
45  
46  
47  
48  
49  
50  
51  
52  
53  
54  
55  
56  
57  
58  
59  
60

In South Africa, colposcopy procedures are generally done at tertiary-level facility, by specialist gynaecology oncologists and trainee gynaecologists under supervision. While there may be benefits to decentralising colposcopy services to lower levels of care, these need to be balanced by the advantages of centralization of cancer services, such as concentrating clinical expertise,

1  
2  
3  
4 with a higher quality of care, and the rationalisation of expensive specialist  
5  
6 equipment. Thus, in this before- and after-study, we aimed to determine if  
7  
8 access to colposcopy increased following the decentralisation of colposcopy  
9  
10 services from a tertiary-level hospital to a primary care facility in inner-city  
11  
12 Johannesburg, South Africa. We compare the total number of colposcopies  
13  
14 done and the coverage of colposcopy services in the primary-level facility after  
15  
16 decentralisation. We also compare the two sites, specifically, the patient  
17  
18 profile and cervical cancer risks, colposcopy procedures, quality of the  
19  
20 services and histology outcomes.  
21  
22  
23  
24  
25  
26  
27  
28

## 29 30 **METHODS**

### 31 32 **Study participants and setting**

33  
34  
35  
36 Women, aged 18 years and older, who accessed colposcopy services at  
37  
38 either Charlotte Maxeke Johannesburg Academic Hospital (CMJAH) or  
39  
40 Hillbrow Community Health Centre (HCHC) between October 2012 and  
41  
42 September 2016 were included in the study. Both facilities are in sub-district F  
43  
44 of the Johannesburg Health District (JHD).  
45  
46  
47  
48  
49

50  
51 The colposcopy clinic at CMJAH is part of the Gynaecology-Oncology  
52  
53 Department at CMJAH, which has two colposcopy machines. Women  
54  
55 attending a facility in JHD who have an abnormal Pap smear are referred to  
56  
57 the facility, where they are provided with an appointment date for colposcopy.  
58  
59  
60

1  
2  
3  
4 Hillbrow Community Health Centre (HCHC) is situated in the densely  
5  
6 populated inner-city area of Hillbrow, about 3km from CMJAH.[19] HCHC  
7  
8 provides primary level care, including a 24 hour casualty and a midwife  
9  
10 obstetrics unit. The facility is run predominantly by nursing staff, with support  
11  
12 from non-specialist medical doctors.  
13  
14  
15  
16  
17

### 18 **Implementation of decentralised services**

19  
20  
21  
22 In 2013, a review of patient files at HCHC found that a large proportion of  
23  
24 women attending the HIV clinic had high-risk lesions on Pap smear.[20]  
25  
26 Moreover, there were reports from patients and health workers at HCHC of  
27  
28 prolonged waiting times for colposcopy services at CMJAH. The Wits  
29  
30 Reproductive Health and HIV Institute (Wits RHI) thus set about establishing  
31  
32 decentralised colposcopy services at HCHC. A private sector company  
33  
34 donated a colposcopy machine. Two district medical officers were trained by  
35  
36 specialist gynaecology oncologists at CMJAH to provide the service. CMJAH  
37  
38 staff provided ongoing support and established referral processes between  
39  
40 the two facilities. Monthly meetings were held between staff at the two  
41  
42 facilities, where concerns and difficult cases could be discussed.  
43  
44  
45  
46  
47  
48  
49  
50  
51  
52

53  
54 The services, which began in October 2014, were provided twice a week by  
55  
56 the medical officers, with assistance from the nurse who takes Pap smears at  
57  
58 the facility. Patients attending HCHC and some referred from surrounding  
59  
60

1  
2  
3  
4 clinics were given an appointment for colposcopy if they had an abnormal Pap  
5  
6 smear result, defined as: high-grade squamous intraepithelial lesion (HSIL),  
7  
8 atypical squamous cell and HSIL cannot be excluded (ASC-H), or squamous  
9  
10 cell carcinoma (SCC).[21] A few patients with Pap smear results other than  
11  
12 those defined as abnormal smears were also referred for colposcopy. Patients  
13  
14 with complex lesions, such as abnormal cervical anatomy or a high suspicion  
15  
16 of cancer on Pap smear were referred to CMJAH, as were those with a failed  
17  
18 colposcopy. Colposcopy procedures included colposcopic assessment only,  
19  
20 or colposcopic assessment together with either a Lletz or biopsy. Histology  
21  
22 specimens were processed at the National Health Laboratory Service (NHLS).  
23  
24  
25  
26  
27  
28  
29  
30

### 31 32 **Data sources and collection**

33  
34  
35  
36 For the purpose of this evaluation, women who accessed colposcopy services  
37  
38 at CMJAH and HCHC were divided into three groups: 1) pre-decentralisation  
39  
40 at CMJAH between October 2012 and September 2014; 2) post-  
41  
42 decentralisation at CMJAH between October 2014 and September 2016; and  
43  
44  
45 3) post-decentralisation at HCHC between October 2014 and September  
46  
47  
48 2016.  
49  
50  
51

52  
53 At CMJAH, we extracted data from paper-based records at the colposcopy  
54  
55 clinic, including on patients' age, HIV status, antiretroviral treatment, date of  
56  
57 Pap smear, Pap smear result, date of colposcopy, colposcopy procedure  
58  
59  
60

1  
2  
3 performed and histology results. Data were entered into a REDCap electronic  
4 database (REDCap Software, Version 4.14.5, Vanderbilt University).[22] At  
5  
6 HCHC, demographic and clinical data on women who accessed colposcopy  
7  
8 services were entered into an MS Excel spreadsheet after each patient visit.  
9  
10  
11  
12  
13  
14  
15 Data were obtained from the NHLS on Pap smear cytology for women  
16  
17 attending HCHC who had a Pap smear and for the whole of JHD.  
18  
19  
20

### 21 **Study variables and statistical analysis**

22  
23  
24 Access to colposcopy was measured by the total number of colposcopies  
25  
26 done across the two facilities and the colposcopy coverage at HCHC, the  
27  
28 primary study outcome. Coverage was estimated by calculating the proportion  
29  
30 of all women at HCHC with an abnormal Pap smear who had a colposcopy.  
31  
32  
33  
34  
35 Time to colposcopy was calculated as the number of months from date of Pap  
36  
37 smear to colposcopy and was categorised as optimal (under 3 months),  
38  
39 acceptable (3-6 months) and delayed (greater than 6 months). We also  
40  
41 examined changes in referral patterns of women who had an abnormal Pap  
42  
43 smear at HCHC.  
44  
45  
46  
47  
48  
49

50 Patient characteristics were compared between the three groups, as well as  
51  
52 level of integration of HIV services (provision of HIV testing and antiretroviral  
53  
54 treatment).  
55  
56  
57  
58  
59  
60

1  
2  
3  
4 We also compared the types of colposcopy procedures performed in the  
5  
6 different periods and histology findings. Histology results were classified as  
7  
8 normal (includes benign endocervical polyp, atrophic ectocervical mucosa,  
9  
10 koilocytosis and metaplasia), Cervical Intraepithelial Neoplasia (CIN) I, CIN  
11  
12 II, CIN III, carcinoma, other (includes infections such as cervicitis,  
13  
14 inflammation and dysplasia) and invalid specimens (includes absent results).  
15  
16  
17  
18  
19  
20  
21  
22  
23  
24  
25  
26  
27  
28  
29  
30  
31  
32  
33  
34  
35  
36  
37  
38  
39  
40  
41  
42  
43  
44  
45  
46  
47  
48  
49  
50  
51  
52  
53  
54  
55  
56  
57  
58  
59  
60

Quality of services was evaluated using proxy markers, specifically the proportion of invalid specimens and number of unsuccessful colposcopy procedures. Differences between the three study groups were assessed using a chi-square test or a Wilcoxon rank-sum test, as appropriate. All data were analysed using STATA version 13.0.

### **Ethical considerations**

Ethical approval was obtained from Human Research Ethics Committee of the University of the Witwatersrand (Certificate number: M151184). Permission for use of the CMJAH data was granted by the hospital's Chief Executive Officer, and the head of the Department of Obstetrics and Gynaecology at CMJAH.

The NHLS Academic Affairs and Research Office gave permission for use of their data.

### **Patient involvement**

The study utilised data that had already been collected as part of routine patient care, and thus patients were not directly involved in the study. We did, however, attempt to contact patients who had abnormal lesions on histology and had not attended follow-up visits.

## RESULTS

### Access to colposcopy and timeliness of services

In total, 910 women accessed colposcopy at CMJAH between October 2012 and September 2014. In the subsequent two years, 1120 women had a colposcopy: 399 at HCHC (35.6%) and 721 at CMJAH (64.4%; Table 1 and Figure 1).

**Table 1:** Patient characteristics and colposcopy outcomes at a community clinic, and a tertiary-level facility before and after decentralisation

| Variables       |                            | Before versus after decentralisation at CMJAH |                                            |            | HCHC versus CMJAH after decentralisation |            |
|-----------------|----------------------------|-----------------------------------------------|--------------------------------------------|------------|------------------------------------------|------------|
|                 |                            | A) Pre-decentralisation (2012-2014) N=910     | B) Post-decentralisation (2014-2016) N=721 | P (A vs B) | C) Hillbrow CHC (2014-2016) N=399        | P (B vs C) |
| Characteristics | <b>Age groups in years</b> |                                               |                                            |            |                                          |            |
|                 | <20                        | 7 (0.8)                                       | 6 (0.8)                                    |            | 0 (0)                                    |            |
|                 | 20-34                      | 351 (39.8)                                    | 209 (30.2)                                 |            | 150 (37.6)                               |            |
|                 | 35-44                      | 342 (38.8)                                    | 266 (38.4)                                 |            | 156 (39.1)                               |            |
|                 | 45-59                      | 161 (18.3)                                    | 187 (27.0)                                 |            | 79 (19.8)                                |            |
|                 | >60                        | 20 (2.3)                                      | 25 (3.6)                                   | 0.001      | 7 (1.8)                                  | 0.003      |
|                 | <b>HIV status known</b>    | 650 (71.4)                                    | 429 (59.5)                                 | <0.001     | 399 (100)                                | <0.001     |



|                                  |                                         |                   |                |         |                |        |
|----------------------------------|-----------------------------------------|-------------------|----------------|---------|----------------|--------|
|                                  | <b>HIV status<sup>^</sup></b>           |                   |                |         |                |        |
|                                  | Negative                                | 105 (16.2)        | 59 (13.8)      |         | 62 (15.5)      |        |
|                                  | Positive                                | 545 (83.9)        | 370 (86.3)     | 0.28    | 337 (84.5)     | 0.47   |
|                                  | <b>On ART<sup>%</sup></b>               | 428/544<br>(78.7) | 324/370 (87.6) | <0.001  | 336/337 (99.7) | <0.001 |
| <b>Cervical cancer Screening</b> | <b>Facility where Pap smear done</b>    |                   |                |         |                |        |
|                                  | CMJAH                                   | 115 (12.8)        | 124 (17.5)     |         | 0 (0.0)        |        |
|                                  | HCHC                                    | 114 (12.7)        | 43 (6.1)       |         | 307 (76.9)     |        |
|                                  | Other clinic or hospital                | 671 (74.6)        | 540 (76.4)     | <0.001  | 92 (23.1)      | <0.001 |
|                                  | <b>Pap smear results</b>                |                   |                |         |                |        |
|                                  | NILM                                    | 6 (0.7)           | 8 (1.1)        |         | 17 (4.3)       |        |
|                                  | LSIL                                    | 141 (15.5)        | 125 (17.4)     |         | 79 (20.0)      |        |
|                                  | ASCUS                                   | 19 (2.1)          | 34 (4.7)       |         | 4 (1.0)        |        |
|                                  | HSIL                                    | 678 (74.7)        | 478 (66.4)     |         | 263 (66.4)     |        |
|                                  | ASC-H                                   | 63 (6.9)          | 65 (9.0)       |         | 27 (6.8)       |        |
| Carcinoma                        | 1 (0.1)                                 | 10 (1.4)          | <0.001         | 6 (1.5) | <0.001         |        |
| <b>Cervical cancer Screening</b> | <b>Pap smear risk categories</b>        |                   |                |         |                |        |
|                                  | NILM, LSIL or ACSUS                     | 166 (18.3)        | 167 (23.2)     |         | 100 (25.3)     |        |
|                                  | HSIL, ASC-H or carcinoma                | 742 (81.7)        | 553 (76.8)     | 0.015   | 296 (74.8)     | 0.44   |
| <b>Cervical cancer diagnosis</b> | <b>Procedure during colposcopy</b>      |                   |                |         |                |        |
|                                  | Visual inspection only                  | 37 (4.1)          | 37 (5.2)       |         | 63 (15.9)      |        |
|                                  | Lletz                                   | 337 (37.2)        | 258 (35.9)     |         | 231 (58.2)     |        |
|                                  | Biopsy                                  | 526 (58.0)        | 420 (58.4)     |         | 90 (22.7)      |        |
|                                  | Other                                   | 7 (0.8)           | 4 (0.6)        | 0.69    | 13 (3.3)       | <0.001 |
|                                  | <b>Histology result<sup>&amp;</sup></b> |                   |                |         |                |        |
|                                  | Normal                                  | 27 (3.1)          | 30 (4.4)       |         | 45 (13.8)      |        |
|                                  | CIN I                                   | 254 (29.3)        | 200 (29.3)     |         | 84 (25.7)      |        |
|                                  | CIN II                                  | 298 (34.3)        | 209 (30.7)     |         | 99 (30.3)      |        |
|                                  | CIN III                                 | 236 (27.2)        | 198 (29.0)     |         | 86 (26.3)      |        |
| Carcinoma                        | 3 (0.4)                                 | 9 (1.3)           |                | 2 (0.6) |                |        |
| Other <sup>†</sup>               | 34 (3.9)                                | 19 (2.8)          |                | 2 (0.6) |                |        |
| Invalid specimen                 | 16 (1.8)                                | 17 (2.5)          | 0.10           | 9 (2.8) | <0.001         |        |

$\chi^2$  test for categorical variables or Wilcoxon Rank-sum test for continuous variables. <sup>^</sup>Of those with a known HIV status. <sup>%</sup>Of those HIV positive. <sup>&</sup>Of those with a histology specimen taken at biopsy, Lletz or other procedure. Charlotte Maxeke

Johannesburg Academic Hospital (CMJAH). Hillbrow Community Health Centre (HCHC). \*Other includes infections such as cervicitis, inflammation and dysplasia

Of all Pap smears done in the JHD in the two years after decentralisation (114,983), 1.9% were done at HCHC (2227; Table 2). Overall, 18.0% of Pap smears done at HCHC had abnormal cytology and required colposcopy (n=401), compared to only 8.2% of other women in JHD as a whole (n=1826;  $p<0.001$ ). The estimated colposcopy coverage among women who had an abnormal Pap smear at HCHC was 66.6% (267/401; 95%CI=61.7-71.2%).

The number of women who had a Pap smear at HCHC and then a colposcopy at either facility was three-fold higher post-decentralisation than pre-decentralisation (from 113 to 350) (Table 1).

**Table 2:** Cytology results in the City of Johannesburg in 2014-2016

| Variable n (%)                     | Johannesburg health district* (n=114,983) | Hillbrow Community Health Centre (n=2227) | <i>P</i> |
|------------------------------------|-------------------------------------------|-------------------------------------------|----------|
| <b>Pap smear results</b>           |                                           |                                           |          |
| NILM                               | 74,969 (65.2)                             | 852 (38.3)                                |          |
| LSIL                               | 23,212 (20.2)                             | 790 (35.5)                                |          |
| ASCUS                              | 7391 (6.4)                                | 184 (8.3)                                 |          |
| HSIL                               | 7808 (6.8)                                | 364 (16.3)                                |          |
| ASC-H                              | 1221 (1.1)                                | 28 (1.3)                                  |          |
| Carcinoma                          | 382 (0.3)                                 | 9 (0.4)                                   | <0.001   |
| <b>Number requiring colposcopy</b> |                                           |                                           |          |
| No (NILM, LSIL or ASCUS)           | 105,572 (91.8)                            | 9411 (82.0)                               |          |

|                                |            |            |        |
|--------------------------------|------------|------------|--------|
| Yes (HSIL, ASC-H or carcinoma) | 1826 (8.2) | 401 (18.0) | <0.001 |
|--------------------------------|------------|------------|--------|

Data from the National Health Laboratory Service. Excludes invalid or missing specimens, and other Pap smear results (n=2446).

\*District total excludes HCHC

Almost half of the women at CMJAH had a delay in receiving colposcopy (>6 months between Pap smear and colposcopy) post-decentralisation, compared to about a third pre-decentralisation (47.3% versus 36.2%,  $p<0.001$ ; Figure 1: Graph 1A). At HCHC, 21.7% of women had a colposcopy within three months of a Pap smear being taken (versus 11.8% at CMJAH pre- and 15.4% post-decentralisation,  $p<0.001$ ).

The absolute number of women at CMJAH who had had a Pap smear at HCHC decreased from 113 to 43 in the second period. One quarter of women who had a colposcopy at HCHC had had their Pap smear at another facility.

### Characteristics of women in the three groups and HIV service integration

The proportion of women older than 45 years pre-decentralisation at CMJAH was 20.6%, post-decentralisation at CMJAH 30.6% and at HCHC 21.9% ( $p<0.001$ ). At CMJAH, more women had a known HIV status pre-decentralisation than post-decentralisation (71.4% versus 59.5%,  $p<0.001$ ). All women at HCHC had a documented HIV status. Around 85% of women with a known HIV status were HIV positive in all three groups. The proportion of

1  
2  
3  
4 positive women receiving ART rose in the second period at CMJAH from  
5  
6 78.7% to 87.6% ( $p<0.001$ ), and almost all positive women were on ART at  
7  
8 HCHC (99.7%;  $p<0.001$ ) (Table 1).  
9  
10  
11  
12  
13  
14  
15  
16  
17  
18  
19  
20  
21  
22

### 23 **Description of colposcopy procedures, histology findings and colposcopy** 24 **quality** 25 26 27 28

29 At CMJAH, in both periods, nearly 60% of women had a biopsy at colposcopy  
30 (58.2%), while the same proportion had a Lletz at HCHC (58.2%). Three  
31 women who had a colposcopy at HCHC were referred to CMJAH due to an  
32 unsuccessful procedure.  
33  
34  
35  
36  
37  
38  
39  
40

41 Women at HCHC were 3.5 fold more likely to have a normal result on  
42 histology than women at CMJAH (95%CI OR=2.1-5.7). Post-decentralisation,  
43 29.0% of women at CMJAH and 26.3% at HCHC had CIN III lesions ( $p=0.37$ ;  
44 Figure 1; Graph1B). Post-decentralisation, 11 women had a diagnosis of  
45 carcinoma on histology (1.1%), compared to 3 before decentralisation (0.4%;  
46  $p=0.06$ ). The proportion of invalid specimens was similar across the three  
47 groups, ranging from 1.8 to 2.8% (Table 1).  
48  
49  
50  
51  
52  
53  
54  
55  
56  
57  
58  
59  
60

## DISCUSSION

In this study we determined whether decentralisation to primary care level improved access to colposcopy services by reviewing the number of women attending the service before and after decentralisation, and the coverage of colposcopy among women at HCHC. We found that the cumulative number of colposcopies across the two facilities rose following decentralisation, and after only two years, HCHC was responsible for a third of all colposcopies in the sub-district, even though it performs a negligible number of Pap smears relative to other sites. Overall, following decentralisation, three fold more women who had a Pap smear at HCHC had a colposcopy, and equally, at CMJAH, the proportion of women referred from HCHC reduced almost threefold. The marked increase in number of women from HCHC who had a colposcopy indicates that prior to decentralisation there may have been a large unmet need for the service, which was now being addressed, at least in part. The coverage reached 66.6%, considerably higher than figures in other settings.

Decentralisation of colposcopy services to primary level care has several potential benefits. Firstly, with adequate training, tasks that had been performed by highly specialised staff can be shifted to lower health worker cadres, allowing specialists to focus on more complex cases.[23] Additionally,

1  
2  
3  
4 decentralisation may alleviate patient barriers to access, by bringing services  
5  
6 closer to them – in settings they are familiar with – and reducing their transport  
7  
8 and other costs.[13, 23] Decentralisation has long been central to the  
9  
10 provision of HIV services in this setting through, for example, task shifting,  
11  
12 providing antiretroviral treatment in primary care services and the dispensing  
13  
14 of drugs from local pharmacies, rather than clinics.[24]  
15  
16  
17  
18  
19  
20

21 Decentralisation of colposcopy can take several forms, including  
22  
23 telecolposcopy from distant sites, outreach portable colposcopy, shifting of  
24  
25 services to nurse practitioners or medical officers, and decentralisation to  
26  
27 lower level facilities, as in this study.[25] In other settings, shifting services to  
28  
29 lower care levels was found to be cost-effective, acceptable to patients and to  
30  
31 increase rates of attendance for colposcopy.[16, 25, 26] In the Western Cape,  
32  
33 South Africa, for example, colposcopy services were decentralised to a district  
34  
35 hospital and provided by a gynaecologist.[23] This raised uptake of the service  
36  
37 and reduced time to procedure. In high-income countries, services have been  
38  
39 successfully decentralised to community health centres and portable outreach  
40  
41 programmes in Alaska, the United States, and parts of Canada and Australia,  
42  
43 targeting immigrant, Inuit and other vulnerable women.[16, 17, 26-28] The  
44  
45 National Health Service in United Kingdom has gone a step further and  
46  
47  
48  
49  
50  
51  
52  
53  
54  
55  
56  
57  
58  
59  
60

1  
2  
3  
4 colposcopy is often performed by nurse practitioners once they have  
5  
6 completed certification procedures.[29]  
7  
8  
9

10 Women attending HCHC colposcopy were at lower risk than those at CMJAH,  
11  
12 as shown by their lower grades of abnormalities on Pap smear and histology.  
13  
14

15 Women at HCHC were also younger than those at CMJAH, important as risk  
16  
17 for cervical cancer is higher in rises considerably with age (the mean age at  
18  
19 diagnosis of cervical cancer is 52.3 in South Africa).[30] These findings may  
20  
21 suggest that, as the programme had envisaged, higher-risk patients are being  
22  
23 referred to CMJAH. Overall, services at HCHC appear to be performing well,  
24  
25 with all women tested for HIV and almost all those positive were receiving  
26  
27 ART. In addition, colposcopy services were now integrated into their care,  
28  
29 which was previously off-site, complex to access and marked by lengthy  
30  
31 delays. HIV-positive women made up the large majority of patients in all  
32  
33 groups, reflecting the higher levels of risk for cervical cancer in this population.  
34  
35  
36  
37  
38  
39  
40  
41  
42  
43  
44  
45  
46  
47  
48  
49  
50  
51  
52  
53  
54  
55  
56  
57  
58  
59  
60  
Clearly it remains a priority to integrate screening for cervical cancer within all  
clinics providing antiretroviral treatment. Equally, ART and services such as  
screening and treatment for sexually transmitted infections could be integrated  
within colposcopy clinics, reducing the opportunity costs associated with  
multiple visits to the clinic and lowering the risk of loss to follow up.

1  
2  
3  
4 The similar number of invalid histology samples and the isolated cases of  
5  
6 failed colposcopy suggests that the quality of colposcopy services at HCHC  
7  
8 may have been comparable to CMJAH. Unlike at CMJAH, however, Lletz was  
9  
10 the commonest procedure at HCHC, in keeping with evidence that Lletz is  
11  
12 better suited to lower level facilities and staff.[10] With decentralisation, it is  
13  
14 critical to ensure that staff are adequately trained and service quality is closely  
15  
16 monitored. The hesitancy to decentralise colposcopy to date, may reflect  
17  
18 underlying concerns that cases of cancer may go undetected by lower-level  
19  
20 staff. In some settings, lower-level health workers undergo a process of  
21  
22 certification and have to perform a certain number of colposcopies per year to  
23  
24 remain registered.[29] While this approach may hold advantages, onerous  
25  
26 processes around certification and recertification may lead to staff  
27  
28 discontinuing colposcopy.[31]

29  
30  
31  
32  
33  
34  
35  
36  
37  
38  
39  
40  
41 The decline in number of colposcopies at CMJAH is concerning, and may  
42  
43 reflect factors other than a reduction in demand that accompanies  
44  
45 decentralisation. Fewer women at the site had a known HIV status and waiting  
46  
47 times for colposcopy lengthened. Thus, though decentralisation can reduce  
48  
49 the patient burden at referral centres, this does not necessarily translate into  
50  
51 improved services at that site. Other factors may play a larger influence, for  
52  
53  
54  
55  
56  
57  
58  
59  
60



1  
2  
3  
4 example, coinciding with the period after decentralisation, CMJAH lost a  
5  
6 number of senior specialists.  
7  
8  
9

10 Delays in colposcopy vary considerably between settings, from an average of  
11  
12 39 days from referral to colposcopy in one study in KwaZulu Natal, South  
13  
14 Africa,[12] to around 5-6 months in both our study and another in the Western  
15  
16 Cape.[23] It is concerning that time from Pap smear to colposcopy is greater  
17  
18 than six months for half the women at CMJAH, and a third at HCHC. Reducing  
19  
20 these delays is clearly a priority at both sites. We were unable, however, to  
21  
22 discern reasons for these delays, which could be caused by delays in  
23  
24 providing the results of Pap smears to patients, patient delays in making or  
25  
26 attending appointments, or shortages of specialist staff. We could also not  
27  
28 investigate which group of patients required referral to higher levels of care,  
29  
30 and future studies might attempt to define criteria for referral. Moreover, given  
31  
32 the relatively short period of the review, we are unable to assess sustainability  
33  
34 of the services in the long-run, a pressing question. Lastly, the study  
35  
36 evaluated the use of colposcopy following cytological screening with Pap  
37  
38 smears and these findings may not be generalizable to screening with HPV  
39  
40 testing.[29] HPV testing has a considerably higher sensitivity for detecting  
41  
42 precursor lesions of cervical cancer compared to cytology, and thus may alter  
43  
44  
45  
46  
47  
48  
49  
50  
51  
52  
53  
54  
55  
56  
57  
58  
59  
60

1  
2  
3  
4 the number of patients requiring colposcopy and types of lesions  
5  
6 identified.[32, 33]  
7  
8

## 9 10 **CONCLUSION**

11  
12  
13 In conclusion, decentralisation of colposcopy services can improve access to  
14  
15 colposcopy, resulting in faster diagnoses of precancerous lesions of the  
16  
17 cervix, more lesions being treated with LLETZ and a reduction in the burden of  
18  
19 patients in tertiary hospitals. Most importantly, increasing the number of  
20  
21 colposcopies and treatments of precancerous lesions could reduce the  
22  
23 incidence of cervical cancer. This is particularly important among HIV-positive  
24  
25 women who now live longer with ART, and the treatment of their co-  
26  
27 morbidities is rapidly gaining in importance. Though coverage of colposcopy  
28  
29 reached two thirds at HCHC, it is important to identify interventions to further  
30  
31 raise coverage levels. Decentralisation is unlikely to affect the quality of  
32  
33 services if medical officers are appropriately trained, supervised and  
34  
35 supported by clear referral guidelines. The approach presented here could be  
36  
37 extended to other primary- or secondary-level facilities in South Africa, and  
38  
39 perhaps encompass the use of portable colposcopes or telecolposcopy, under  
40  
41 close supervision. If done correctly and at scale, decentralisation of  
42  
43 colposcopy services, could shore up cervical cancer prevention and finally  
44  
45 decrease the public health burden and mortality due to the cancer.  
46  
47  
48  
49  
50  
51  
52  
53  
54  
55  
56  
57  
58  
59  
60

## ACKNOWLEDGEMENTS

We would like to acknowledge the following persons who contributed to this study:

H. Manyonga, Z. Dumakude, A. Moholola, N. Wattrus, L. Mbuyisa, I. Sishi, N. Twala, S. Sidabuka, E. Briedenhann, L. Mavuya, K. Moshaba, S. Mzobe, S. Carmona (NHLS), L. Chauke (Department of Obstetrics and Gynaecology, CMJAH).

## FUNDING

This study has been made possible through funding from USAID-PEPFAR, grant number: AID-A-12-67400021. We would also like to acknowledge the following organizations for donating a colposcopy machine to Hillbrow CHC: Vodacom, Altech and Altron.

## COMPETING INTERESTS

1  
2  
3  
4 All authors listed in this study do not have competing interests to declare.  
5  
6  
7  
8  
9

## 10 DATA SHARING STATEMENT

11  
12  
13  
14 There's no additional unpublished data from the study.  
15  
16

## 17 AUTHOR CONTRIBUTIONS

18  
19  
20  
21 **Manuscript title:** The impact of decentralising colposcopy services from  
22 tertiary- to primary-level care in inner-city Johannesburg, South Africa: a  
23 before and after study  
24  
25  
26

### 27 Category 1

28  
29  
30  
31 **Conception and design of study:** G. Maimela\*1, X. Nene\*1, S. Sawry, N.  
32 Mvundla, M. Chersich  
33  
34

35  
36 **Acquisition of data:** G. Maimela, X. Nene, N. Mvundla,  
37

38  
39 **Analysis and/or interpretation of data:** G. Maimela, X. Nene, S. Sawry, E.  
40 Kachingwe, M. Chersich, H. Rees; T. Smith.  
41  
42  
43

### 44 Category 2

45  
46  
47 **Drafting the manuscript:** G. Maimela, X. Nene, N. Mvundla, S. Sawry, E.  
48 Kachingwe, M. Chersich.  
49  
50

51  
52 **Revising the manuscript critically for important intellectual content:** M.  
53 Chersich, H. Rees, T. Smith  
54  
55

### 56 Category 3

57  
58  
59 **Approval of the version of the manuscript to be published:**  
60

1  
2  
3 G. Maimela\*1, X. Nene\*1, N. Mvundla1, S. Sawry1, T. Smith2, H. Rees1,  
4  
5 E.Kachingwe1, M. Chersich1  
6  
7  
8  
9  
10  
11

12 **ACKNOWLEDGEMENTS:** *All persons who have made substantial*  
13 *contributions to the work reported in the manuscript (e.g., technical help,*  
14 *writing and editing assistance, general support), but who do not meet the*  
15 *criteria for authorship, are named in the Acknowledgements and have given*  
16 *us their written permission to be named. If we have not included an*  
17 *Acknowledgements, then that indicates that we have not received substantial*  
18 *contributions from non-authors.*  
19  
20  
21  
22  
23  
24  
25  
26  
27

28 H. Manyonga, Z. Dumakude, A. Moholola, N. Wattrus, L. Mbuyisa, I. Sishi, N.  
29  
30 Twala, S. Sidabuka, E. Briedenhann, L. Mavuya, K. Moshaba, S. Mzobe, S.  
31  
32 Carmona (NHLS), L. Chauke (Department of Obstetrics and Gynaecology,  
33  
34 CMJAH).  
35  
36

37 This statement is signed by all the authors (a photocopy of this form may be  
38  
39 used if there are more than 10 authors):  
40  
41

## 42 REFERENCES

- 43  
44  
45 1. WHO. Cervical Cancer: An NCD We Can Overcome: Call to Action. 2018.  
46 [http://www.who.int/reproductivehealth/DG\\_Call-to-Action.pdf](http://www.who.int/reproductivehealth/DG_Call-to-Action.pdf).  
47  
48  
49 2. Bruni L, Barrionuevo-Rosas L, Albero G, Serrano B, Mena M, Gómez D, et al.  
50 ICO/IARC Information Centre on HPV and Cancer (HPV Information Centre). Human  
51 Papillomavirus and Related Diseases in the World. . Summary Report 27 July 2017.  
52 <http://www.hpvcentre.net/statistics/reports/XWX.pdf>.  
53  
54  
55  
56  
57  
58  
59  
60

- 1  
2  
3  
4 3. Batra P, Kuhn L, Denny L. Utilisation and outcomes of cervical cancer  
5 prevention services among HIV-infected women in Cape Town. SAMJ: South African  
6 Medical Journal. 2010;100:39-44.  
7
- 8  
9 4. ICO/IARC Information Centre on HPV and Cancer. South Africa Human  
10 Papillomavirus and Related Cancers, Fact Sheet 2017. 2017.  
11  
12 [http://www.hpvcentre.net/statistics/reports/ZAF\\_FS.pdf](http://www.hpvcentre.net/statistics/reports/ZAF_FS.pdf).  
13
- 14  
15 5. Shisana O, Rehle T, Simbayi LC, Zuma K, Jooste S, Zungu N, et al. South  
16 African National HIV Prevalence, Incidence and Behaviour Survey, 2012. Cape  
17 Town: HSRC Press; 2014.  
18
- 19  
20 6. Adler D, Wallace M, Bennie T, Abar B, Sadeghi R, Meiring T, et al. High risk  
21 human papillomavirus persistence among HIV-infected young women in South  
22 Africa. International journal of infectious diseases : IJID : official publication of the  
23 International Society for Infectious Diseases. 2015;33:219-21.  
24
- 25  
26 7. Guiguet M, Boue F, Cadranel J, Lang JM, Rosenthal E, Costagliola D, et al.  
27 Effect of immunodeficiency, HIV viral load, and antiretroviral therapy on the risk of  
28 individual malignancies (FHDH-ANRS CO4): a prospective cohort study. Lancet  
29 Oncol. 2009;10(12):1152-9.  
30
- 31  
32 8. National Department of Health South Africa. Cervical Cancer Prevention and  
33 Control Policy. 2017.  
34
- 35  
36 9. Day C, Gray A, Ndlovu N. South African Health Review 2018. Durban: Health  
37 Systems Trust. 2018.  
38
- 39  
40 10. WHO. WHO guidelines for screening and treatment of precancerous lesions  
41 for cervical cancer prevention.  
42  
43 [http://apps.who.int/iris/bitstream/handle/10665/94830/9789241548694\\_eng.pdf;jsessi](http://apps.who.int/iris/bitstream/handle/10665/94830/9789241548694_eng.pdf;jsessionid=F65ED4960A15E4D16BB15F6E57F71518?sequence=1)  
44  
45 [onid=F65ED4960A15E4D16BB15F6E57F71518?sequence=1](http://apps.who.int/iris/bitstream/handle/10665/94830/9789241548694_eng.pdf;jsessionid=F65ED4960A15E4D16BB15F6E57F71518?sequence=1); 2013.  
46  
47
- 48  
49 11. Denny L, Kuhn L. Cervical cancer prevention and early detection from a South  
50 African perspective. Chapter 18. South African Health Review Published by Health  
51 Systems Trust. 2017.  
52  
53  
54  
55  
56  
57  
58  
59  
60

12. Katz IT, Butler LM, Crankshaw TL, Wright AA, Bramhill K, Leone DA, et al. Cervical Abnormalities in South African Women Living With HIV With High Screening and Referral Rates. *J Glob Oncol*. 2016;2(6):375-80.
13. Dawood S. Barriers and Facilitators to Colposcopy Attendance. Following an Abnormal Pap Smear: Patient and Provider Perspectives. Cape Town: University of Cape Town; 2014.
14. Momberg M, Botha MH, Van der Merwe FH, Moodley J. Women's experiences with cervical cancer screening in a colposcopy referral clinic in Cape Town, South Africa: a qualitative analysis. *BMJ open*. 2017;7(2):e013914.
15. Hoque M, Hoque E, Kader SB. Evaluation of cervical cancer screening program at a rural community of South Africa. *East African journal of public health*. 2008;5(2):111-6.
16. Martin B, Smith W, Orr P, Guijon F. Investigation and management of cervical intraepithelial neoplasia in Canadian Inuit: enhancing access to care. *Arctic Med Res*. 1995;54 Suppl 1:117-21.
17. Payne S, Jarrett N, Jeffs D. The impact of travel on cancer patients' experiences of treatment: a literature review. *Eur J Cancer Care (Engl)*. 2000;9(4):197-203.
18. Baranoski AS, Stier EA. Factors associated with time to colposcopy after abnormal Pap testing in HIV-infected women. *Journal of women's health (2002)*. 2012;21(4):418-24.
19. Rees H, Delany-Moretlwe S, Scorgie F, Luchters S, Chersich MF. At the Heart of the Problem: Health in Johannesburg's Inner-City. *BMC Public Health*. 2017;17(Suppl 3):554.
20. Stadler J, Chikandiwe A, Mayaud P, Rees H, Imrie J, Delany-Moretlwe S. Biographies of HIV and Cervical Cancer: Understanding Treatment-Seeking Amongst HIV Positive Women in Inner City Johannesburg. IAS conference, Durba, South Africa, Oral presentation. 2016.

- 1  
2  
3  
4 21. Botha MH. Guidelines for cervical cancer screening in South Africa. *Southern*  
5  
6 *African Journal of Gynaecological Oncology* 2017;9(1):8-12.
- 7  
8 22. Harris PA, Taylor R, Thielke R, Payne J, Gonzalez N, Conde JG. Research  
9  
10 electronic data capture (REDCap)--a metadata-driven methodology and workflow  
11  
12 process for providing translational research informatics support. *J Biomed Inform.*  
13  
14 2009;42(2):377-81.
- 15  
16 23. Blanckenberg ND, Oettle CA, Conradie HH, Krige FK. Impact of introduction  
17  
18 of a colposcopy service in a rural South African sub-district on uptake of colposcopy.  
19  
20 *South African Journal of Obstetrics and Gynaecology.* 2013;19(3).
- 21  
22 24. Callaghan M, Ford N, Schneider H. A systematic review of task- shifting for  
23  
24 HIV treatment and care in Africa. *Human resources for health.* 2010;8:8.
- 25  
26 25. Bishai DM, Ferris DG, Litaker MS. What is the least costly strategy to evaluate  
27  
28 cervical abnormalities in rural women? Comparing telemedicine, local practitioners,  
29  
30 and expert physicians. *Med Decis Making.* 2003;23(6):463-70.
- 31  
32 26. Ogilvie GS, Shaw EA, Lusk SP, Zazulak J, Kaczorowski JA. Access to  
33  
34 colposcopy services for high-risk Canadian women: can we do better? *Can J Public*  
35  
36 *Health.* 2004;95(5):346-51.
- 37  
38 27. Gifford MS, Stone IK. Quality, access, and clinical issues in a nurse  
39  
40 practitioner colposcopy outreach program. *The Nurse practitioner.* 1993;18(10):25-9,  
41  
42 33-6.
- 43  
44 28. Hartz LE. Quality of care by nurse practitioners delivering colposcopy  
45  
46 services. *J Am Acad Nurse Pract.* 1995;7(1):23-7.
- 47  
48 29. Public Health England, National Health Service. NHS Cervical Screening  
49  
50 Programme Colposcopy and Programme Management. NHSCSP Publication  
51  
52 number 20. Third edition. 2016.  
53  
54 [https://assets.publishing.service.gov.uk/government/uploads/system/uploads/attach](https://assets.publishing.service.gov.uk/government/uploads/system/uploads/attachment_data/file/515817/NHSCSP_colposcopy_management.pdf)  
55  
56 [ment\\_data/file/515817/NHSCSP\\_colposcopy\\_management.pdf](https://assets.publishing.service.gov.uk/government/uploads/system/uploads/attachment_data/file/515817/NHSCSP_colposcopy_management.pdf).
- 57  
58  
59  
60



- 1  
2  
3  
4 30. Olorunfemi G, Ndlovu N, Masukume G, Chikandiwa A, Pisa PT, Singh E.  
5 Temporal trends in the epidemiology of cervical cancer in South Africa (1994-2012).  
6 Int J Cancer. 2018;143(9):2238-49.  
7  
8  
9 31. Sonnex C. Providing a genitourinary medicine colposcopy service. Sexually  
10 transmitted infections. 2014;90(1):8-10.  
11  
12 32. Dijkstra MG, Snijders PJ, Arbyn M, Rijkaart DC, Berkhof J, Meijer CJ. Cervical  
13 cancer screening: on the way to a shift from cytology to full molecular screening. Ann  
14 Oncol. 2014;25(5):927-35.  
15  
16 33. Wright TC, Jr., Stoler MH, Behrens CM, Sharma A, Sharma K, Apple R.  
17 Interlaboratory variation in the performance of liquid-based cytology: insights from  
18 the ATHENA trial. Int J Cancer. 2014;134(8):1835-43.  
19  
20  
21  
22  
23  
24  
25  
26  
27  
28  
29  
30  
31  
32  
33  
34  
35  
36  
37  
38  
39  
40  
41  
42  
43  
44  
45  
46  
47  
48  
49  
50  
51  
52  
53  
54  
55  
56  
57  
58  
59  
60

1  
2  
3  
4  
5  
6  
7  
8  
9  
10  
11  
12  
13  
14  
15  
16  
17  
18  
19  
20  
21  
22  
23 **FIGURE LEGENDS**  
24  
25

26  
27 Figure 1:  
28

29  
30 Graph 1A: Total number of colposcopies done before and after  
31  
32 decentralisation  
33

34  
35  
36 Graph 1B: Number of cervical intraepithelial neoplasia lesions detected before  
37  
38 and after decentralisation  
39  
40  
41  
42  
43  
44  
45  
46  
47  
48  
49  
50  
51  
52  
53  
54  
55  
56  
57  
58  
59  
60

1  
2  
3  
4  
5  
6  
7  
8  
9  
10  
11  
12  
13  
14  
15  
16  
17  
18  
19  
20  
21  
22  
23  
24  
25  
26  
27  
28  
29  
30  
31  
32  
33  
34  
35  
36  
37  
38  
39  
40  
41  
42  
43  
44  
45  
46  
47  
48  
49  
50  
51  
52  
53  
54  
55  
56  
57  
58  
59  
60

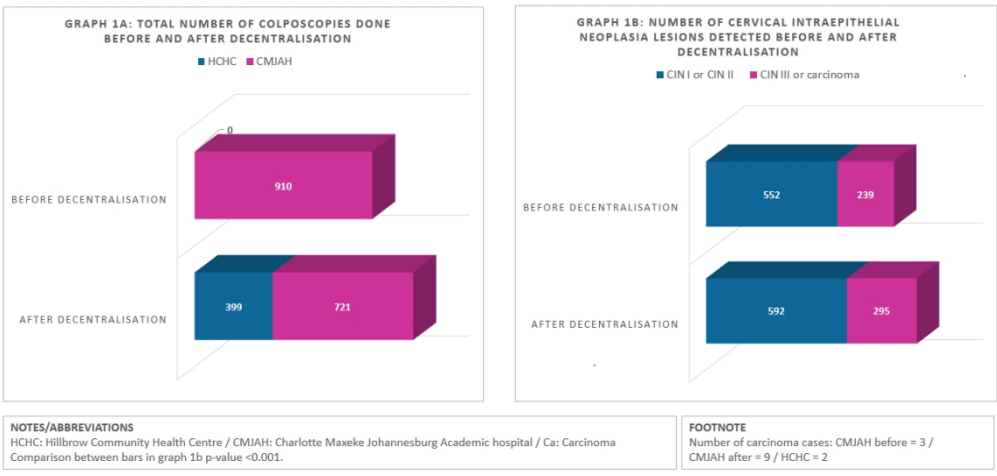

Figure 1:  
Graph 1A: Total number of colposcopies done before and after decentralisation  
Graph 1B: Number of cervical intraepithelial neoplasia lesions detected before and after decentralisation

271x128mm (120 x 120 DPI)

# BMJ Open

## The impact of decentralising colposcopy services from tertiary- to primary-level care in inner-city Johannesburg, South Africa: a before and after study

|                                 |                                                                                                                                                                                                                                                                                                                                                                                                                                                                                                                                                                                                                                                                                                                                                                                                                                                                                                                                                                                                                             |
|---------------------------------|-----------------------------------------------------------------------------------------------------------------------------------------------------------------------------------------------------------------------------------------------------------------------------------------------------------------------------------------------------------------------------------------------------------------------------------------------------------------------------------------------------------------------------------------------------------------------------------------------------------------------------------------------------------------------------------------------------------------------------------------------------------------------------------------------------------------------------------------------------------------------------------------------------------------------------------------------------------------------------------------------------------------------------|
| Journal:                        | <i>BMJ Open</i>                                                                                                                                                                                                                                                                                                                                                                                                                                                                                                                                                                                                                                                                                                                                                                                                                                                                                                                                                                                                             |
| Manuscript ID                   | bmjopen-2018-024726.R3                                                                                                                                                                                                                                                                                                                                                                                                                                                                                                                                                                                                                                                                                                                                                                                                                                                                                                                                                                                                      |
| Article Type:                   | Research                                                                                                                                                                                                                                                                                                                                                                                                                                                                                                                                                                                                                                                                                                                                                                                                                                                                                                                                                                                                                    |
| Date Submitted by the Author:   | 19-Feb-2019                                                                                                                                                                                                                                                                                                                                                                                                                                                                                                                                                                                                                                                                                                                                                                                                                                                                                                                                                                                                                 |
| Complete List of Authors:       | Maimela, Gloria; University of the Witwatersrand, Wits Reproductive Health and HIV Institute, Faculty of Health Sciences<br>Nene, Xolisile; University of the Witwatersrand , Wits Reproductive Health and HIV Institute, Faculty of Health Sciences<br>Mvundla, Nontuthuko; University of the Witwatersrand , Wits Reproductive Health and HIV Institute, Faculty of Health Sciences<br>Sawry, Shobna; University of the Witwatersrand , Wits Reproductive Health and HIV Institute, Faculty of Health Sciences<br>Smith, Trudy; University of the Witwatersrand , Wits Donald Gordon Medical Centre, Faculty of Health Sciences<br>Rees, Helen; University of the Witwatersrand , Wits Reproductive Health and HIV Institute, Faculty of Health Sciences<br>Kachingwe, Elizabeth; University of the Witwatersrand , Wits Reproductive Health and HIV Institute, Faculty of Health Sciences<br>Chersich, Matthew; University of the Witwatersrand , Wits Reproductive Health and HIV Institute, Faculty of Health Sciences |
| <b>Primary Subject Heading</b>: | Public health                                                                                                                                                                                                                                                                                                                                                                                                                                                                                                                                                                                                                                                                                                                                                                                                                                                                                                                                                                                                               |
| Secondary Subject Heading:      | Diagnostics, Obstetrics and gynaecology, Oncology, Reproductive medicine                                                                                                                                                                                                                                                                                                                                                                                                                                                                                                                                                                                                                                                                                                                                                                                                                                                                                                                                                    |
| Keywords:                       | Colposcopy < GYNAECOLOGY, Community gynaecology < GYNAECOLOGY, Gynaecological oncology < GYNAECOLOGY, Minimally invasive surgery < GYNAECOLOGY, PRIMARY CARE, Decentralised Care                                                                                                                                                                                                                                                                                                                                                                                                                                                                                                                                                                                                                                                                                                                                                                                                                                            |
|                                 |                                                                                                                                                                                                                                                                                                                                                                                                                                                                                                                                                                                                                                                                                                                                                                                                                                                                                                                                                                                                                             |

SCHOLARONE™  
Manuscripts

1  
2  
3  
4 **Title:** The impact of decentralising colposcopy services from tertiary- to  
5  
6 primary-level care in inner-city Johannesburg, South Africa: a before and after  
7  
8 study  
9  
10

11  
12 **Authors:** G. Maimela\*<sup>1</sup>, X. Nene\*<sup>1</sup>, N. Mvundla<sup>1</sup>, S. Sawry<sup>1</sup>, T. Smith<sup>2</sup>, H.  
13  
14 Rees<sup>1</sup>, E.Kachingwe<sup>1</sup>, M. Chersich<sup>1</sup>  
15  
16

17  
18  
19 **Affiliations:**  
20  
21

- 22  
23 1. Wits Reproductive Health and HIV Institute, Faculty of Health Sciences,  
24  
25 University of the Witwatersrand, South Africa  
26  
27  
28 2. Department of Obstetrics and Gynaecology, School of Clinical  
29  
30 Medicine, Charlotte Maxeke Johannesburg Academic Hospital, Faculty  
31  
32 of Health Sciences, University of the Witwatersrand, South Africa  
33  
34  
35

36  
37 **Corresponding author:** Gloria Maimela, [GMaimela@wrhi.ac.za](mailto:GMaimela@wrhi.ac.za), Wits  
38  
39  
40 Reproductive Health and HIV Institute, Faculty of Health Sciences, University  
41  
42 of the Witwatersrand, South Africa  
43  
44  
45  
46  
47  
48  
49  
50  
51  
52  
53  
54  
55  
56  
57  
58  
59  
60

## ABSTRACT

**Objective:** To assess whether decentralising colposcopy services to a primary care facility in inner-city Johannesburg, South Africa raises access to colposcopy.

**Design:** Before-after study comparing two years before and two after decentralisation, using clinical records, and laboratory data on cervical cytology and histology.

**Primary outcome:** The proportion of all women attending Hillbrow Community Health Centre (HCHC) with an abnormal Pap smear who had a colposcopy post-decentralisation.

**Setting:** Charlotte Maxeke Johannesburg Academic Hospital (CMJAH) has provided colposcopy services for several decades. HCHC, located about 3km away, began colposcopy services in 2014.

**Participants:** Women, aged above 18 years, who had a colposcopy for diagnosis and treatment of precancerous cervical lesions following a Pap smear, from 2012-2016 at CMJAH or HCHC.

**Results:** Pre-decentralisation at CMJAH, 910 women had colposcopy (2012-2014). Post-decentralisation (2014-2016), 721 had colposcopy at CMJAH and 399 at HCHC, the decentralised facility. The number who had a Pap smear at

1  
2  
3  
4 HCHC and then a colposcopy rose three-fold post-decentralisation (114  
5  
6 versus 350). Post-decentralisation, 43 women at HCHC were referred from  
7  
8  
9 CMJAH for colposcopy, compared to 114 pre-decentralisation. Post-  
10  
11  
12 decentralisation, 47.3% of women at CMJAH waited >6 months for  
13  
14  
15 colposcopy, while 35.5% did at HCHC ( $p<0.001$ ). Across all three groups,  
16  
17  
18 26.9-30.3% of women had CIN III lesions or carcinoma on colposcopy. The  
19  
20  
21 proportion of invalid specimens was similar at CMJAH and HCHC (1.8-2.8%).  
22  
23  
24 Of 401 women who had an abnormal Pap smear at HCHC post-  
25  
26  
27 decentralisation, 267 had colposcopy (66.6%).  
28  
29

30 **Conclusion:** Decentralisation can decrease the time to colposcopy and reduce  
31  
32 the workload of tertiary hospitals. Overall, more women accessed services.  
33  
34  
35 Colposcopy coverage at HCHC is higher than other sites, but could be further  
36  
37  
38 improved. Decentralisation did not appear to undermine the quality of services  
39  
40  
41 and this model could be extended to similar settings in South Africa and  
42  
43  
44 elsewhere.  
45

46 **Key words:** South Africa, colposcopy, cervical cancer, primary health care,  
47  
48  
49 decentralisation  
50  
51  
52  
53  
54  
55  
56  
57  
58  
59  
60

1  
2  
3  
4  
5  
6  
7  
8  
9  
10  
11  
12  
13  
14  
15  
16  
17  
18  
19  
20  
21  
22  
23  
24  
25  
26  
27  
28  
29  
30  
31  
32  
33  
34  
35  
36  
37  
38  
39  
40  
41  
42  
43  
44  
45  
46  
47  
48  
49  
50  
51  
52  
53  
54  
55  
56  
57  
58  
59  
60

For peer review only

**ARTICLE SUMMARY**

**Strengths and limitations of this study**



- The study included a relatively large number of women from high-volume facilities in all study groups, allowing us to detect differences between the time periods
- As the study assessed only one primary care centre in the first two years after decentralisation, we were unable ascertain the intervention's long-term sustainability, or to assess the impact of a broader decentralisation strategy, such as a hub and spoke approach encompassing several primary care centres
- A hub and spoke approach has been successfully applied to other similar health services that require an integrated, tiered health care and laboratory system (such as TB care and colorectal cancer screening), supporting the generalizability of the study findings to similar settings, and assertions about the validity of the results reported.
- The limited number of variables collected meant that the study could not investigate several important questions in detail, such as reasons for delays in colposcopy, the quality of decentralised services or comparisons of changes in access among women at the primary care site over time.
- Data were collected for the purposes of patient care, and not specifically for research, potentially reducing data quality.

## INTRODUCTION

Cervical cancer is a largely preventable disease and WHO has recently launched an initiative aimed at eliminating the condition.[1] At present, cervical cancer is the second most common cancer among women aged 15 to 44 years in the world.[2] In South Africa, it is the commonest cancer in that age group, and mortality rates are high.[3, 4] About 3% of women in South Africa harbour cervical human papilloma virus (HPV)-16/18, which is responsible for the majority of cases of cervical cancer in the country.[4] Rates of cervical cancer in South Africa can partly be attributed to the high level of HIV.[5] Women with HIV infection have a seven-fold higher rate of persistence of high-risk HPV compared to HIV uninfected women,[6] heightening their risk for incident and progressive precancerous lesions. While antiretroviral therapy

1  
2  
3  
4 reduces the risk of cervical cancer and its precursors, the risk remains much  
5  
6 higher than for HIV-negative women.[7]  
7  
8  
9

10 In South Africa, the policy for cervical cancer screening was introduced in  
11  
12 2001 and updated in 2017.[8] The policy recommends that low-risk women  
13  
14 have three Pap smears in a lifetime at the ages of 30, 40 and 50 years, while  
15  
16 women with HIV-infection are to be screened every three years, regardless of  
17  
18 age. About 60% of women aged 30 to 49 years have had cervical cancer  
19  
20 screening.[9] Screening is predominately based on cytology using  
21  
22 Papanikolaou (Pap) smears, although there are plans to introduce liquid-  
23  
24 based cytology which offers the potential to do HPV screening. Women with  
25  
26 atypical findings on cytology are referred for colposcopy to establish a  
27  
28 definitive diagnosis. During colposcopy, the view of the cervix is magnified  
29  
30 and, where required, a biopsy is taken or a large loop excision of the  
31  
32 transformation zone (LLETZ) is conducted.[10]  
33  
34  
35  
36  
37  
38  
39  
40  
41  
42  
43  
44

45 The gap between screening for cervical cancer and treatment of high-risk  
46  
47 lesions is believed to be very high in South Africa.[11] Although there are few  
48  
49 published data to support this assertion, the fact that the number of cervical  
50  
51 cancer cases remains high despite the large number of cervical cancer  
52  
53 screening procedures suggest this is the case. A range of health systems and  
54  
55 patient factors influence access to colposcopy. System barriers include a  
56  
57  
58  
59  
60

1  
2  
3  
4 limited number of colposcopy services, which are mostly centralised within  
5  
6 tertiary-level facilities, with long waiting times for patients and few  
7  
8 opportunities for non-specialist health workers to develop requisite skills.[12]  
9  
10

11  
12 There are limited numbers of specialist gynaecologists within the public  
13  
14 sector, and the high demands on these doctors for emergency and curative  
15  
16 obstetric and gynaecology services may reduce their time available for  
17  
18 diagnostic or preventive interventions, such as colposcopy. Another key factor  
19  
20 is the complexity of providing Pap and other results to patients and then  
21  
22 scheduling colposcopy appointments across the disjointed systems that often  
23  
24 exist between a tertiary hospital and primary care centres.[13-15] Patient-  
25  
26 related factors linked with low uptake of colposcopy include low education  
27  
28 levels, being single, fear of HIV testing and disclosure, a low CD4 count in  
29  
30 HIV-infected women and transport costs for the additional visits.[14, 16, 17]  
31  
32

33  
34 Patient demand for colposcopy is also undermined by a general fear of  
35  
36 cancer, and lack of awareness or knowledge about cervical cancer.[13, 18]  
37  
38

39  
40 Poor patient-provider interactions restrict access, whilst a longstanding  
41  
42 relationship with a primary clinician can optimise uptake.[18]  
43  
44  
45

46  
47 In South Africa, colposcopy procedures are generally done at tertiary-level  
48  
49 facility, by specialist gynaecology oncologists and trainee gynaecologists  
50  
51 under supervision. While there may be benefits to decentralising colposcopy  
52  
53  
54  
55  
56  
57  
58  
59  
60

1  
2  
3  
4 services to lower levels of care, these need to be balanced by the advantages  
5  
6 of centralization of cancer services, such as concentrating clinical expertise,  
7  
8 with a higher quality of care, and the rationalisation of expensive specialist  
9  
10 equipment. Thus, in this before- and after-study, we aimed to determine if  
11  
12 access to colposcopy increased following the decentralisation of colposcopy  
13  
14 services from a tertiary-level hospital to a primary care facility in inner-city  
15  
16 Johannesburg, South Africa. We compare the total number of colposcopies  
17  
18 done and the coverage of colposcopy services in the primary-level facility after  
19  
20 decentralisation. We also compare the two sites, specifically, the patient  
21  
22 profile and cervical cancer risks, colposcopy procedures, quality of the  
23  
24 services and histology outcomes.  
25  
26  
27  
28  
29  
30  
31  
32  
33  
34

## 35 **METHODS**

### 36 **Study participants and setting**

37  
38 Women, aged 18 years and older, who accessed colposcopy services at  
39  
40 either Charlotte Maxeke Johannesburg Academic Hospital (CMJAH) or  
41  
42 Hillbrow Community Health Centre (HCHC) between October 2012 and  
43  
44 September 2016 were included in the study. Both facilities are in sub-district F  
45  
46 of the Johannesburg Health District (JHD).  
47  
48  
49  
50  
51  
52  
53  
54  
55

56 The colposcopy clinic at CMJAH is part of the Gynaecology-Oncology  
57  
58 Department at CMJAH, which has two colposcopy machines. Women  
59  
60

1  
2  
3 attending a facility in JHD who have an abnormal Pap smear are referred to  
4  
5  
6 the facility, where they are provided with an appointment date for colposcopy.  
7  
8

9  
10 Hillbrow Community Health Centre (HCHC) is situated in the densely  
11  
12 populated inner-city area of Hillbrow, about 3km from CMJAH.[19] HCHC  
13  
14 provides primary level care, including a 24 hour casualty and a midwife  
15  
16 obstetrics unit. The facility is run predominantly by nursing staff, with support  
17  
18 from non-specialist medical doctors.  
19  
20  
21  
22

### 23 24 25 **Implementation of decentralised services**

26  
27  
28 In 2013, a review of patient files at HCHC found that a large proportion of  
29  
30 women attending the HIV clinic had high-risk lesions on Pap smear.[20]  
31  
32  
33 Moreover, there were reports from patients and health workers at HCHC of  
34  
35 prolonged waiting times for colposcopy services at CMJAH. The Wits  
36  
37 Reproductive Health and HIV Institute (Wits RHI) thus set about establishing  
38  
39 decentralised colposcopy services at HCHC. A private sector company  
40  
41 donated a colposcopy machine. Two district medical officers were trained by  
42  
43 specialist gynaecology oncologists at CMJAH to provide the service. CMJAH  
44  
45 staff provided ongoing support and established referral processes between  
46  
47 the two facilities. Monthly meetings were held between staff at the two  
48  
49 facilities, where concerns and difficult cases could be discussed.  
50  
51  
52  
53  
54  
55  
56  
57  
58  
59  
60

1  
2  
3  
4 The services, which began in October 2014, were provided twice a week by  
5  
6 the medical officers, with assistance from the nurse who takes Pap smears at  
7  
8 the facility. Patients attending HCHC and some referred from surrounding  
9  
10 clinics were given an appointment for colposcopy if they had an abnormal Pap  
11  
12 smear result, defined as: high-grade squamous intraepithelial lesion (HSIL),  
13  
14 atypical squamous cell and HSIL cannot be excluded (ASC-H), or squamous  
15  
16 cell carcinoma (SCC).[21] A few patients with Pap smear results other than  
17  
18 those defined as abnormal smears were also referred for colposcopy. Patients  
19  
20 with complex lesions, such as abnormal cervical anatomy or a high suspicion  
21  
22 of cancer on Pap smear were referred to CMJAH, as were those with a failed  
23  
24 colposcopy. Colposcopy procedures included colposcopic assessment only,  
25  
26 or colposcopic assessment together with either a Lletz or biopsy. Histology  
27  
28 specimens were processed at the National Health Laboratory Service (NHLS).  
29  
30  
31  
32  
33  
34  
35  
36  
37  
38  
39  
40

### 41 **Data sources and collection**

42  
43  
44 For the purpose of this evaluation, women who accessed colposcopy services  
45  
46 at CMJAH and HCHC were divided into three groups: 1) pre-decentralisation  
47  
48 at CMJAH between October 2012 and September 2014; 2) post-  
49  
50 decentralisation at CMJAH between October 2014 and September 2016; and  
51  
52  
53  
54  
55  
56 3) post-decentralisation at HCHC between October 2014 and September  
57  
58  
59 2016.  
60

1  
2  
3  
4 At CMJAH, we extracted data from paper-based records at the colposcopy  
5  
6 clinic, including on patients' age, HIV status, antiretroviral treatment, date of  
7  
8 Pap smear, Pap smear result, date of colposcopy, colposcopy procedure  
9  
10 performed and histology results. Data were entered into a REDCap electronic  
11  
12 database (REDCap Software, Version 4.14.5, Vanderbilt University).[22] At  
13  
14 HCHC, demographic and clinical data on women who accessed colposcopy  
15  
16 services were entered into an MS Excel spreadsheet after each patient visit.  
17  
18 Data were obtained from the NHLS on Pap smear cytology for women  
19  
20 attending HCHC who had a Pap smear and for the whole of JHD.  
21  
22  
23  
24  
25  
26  
27  
28  
29

### 30 **Study variables and statistical analysis**

31  
32 Access to colposcopy was measured by the total number of colposcopies  
33  
34 done across the two facilities and the colposcopy coverage at HCHC, the  
35  
36 primary study outcome. Coverage was estimated by calculating the proportion  
37  
38 of all women at HCHC with an abnormal Pap smear who had a colposcopy.  
39  
40  
41 Time to colposcopy was calculated as the number of months from date of Pap  
42  
43 smear to colposcopy and was categorised as optimal (under 3 months),  
44  
45 acceptable (3-6 months) and delayed (greater than 6 months). We also  
46  
47 examined changes in referral patterns of women who had an abnormal Pap  
48  
49 smear at HCHC.  
50  
51  
52  
53  
54  
55  
56  
57  
58  
59  
60



1  
2  
3  
4 Patient characteristics were compared between the three groups, as well as  
5  
6 level of integration of HIV services (provision of HIV testing and antiretroviral  
7  
8 treatment).  
9

10  
11  
12 We also compared the types of colposcopy procedures performed in the  
13  
14 different periods and histology findings. Histology results were classified as  
15  
16 normal (includes benign endocervical polyp, atrophic ectocervical mucosa,  
17  
18 koilocytosis and metaplasia), Cervical Intraepithelial Neoplasia (CIN) I, CIN  
19  
20 II, CIN III, carcinoma, other (includes infections such as cervicitis,  
21  
22 inflammation and dysplasia) and invalid specimens (includes absent results).  
23  
24  
25  
26  
27  
28

29  
30 Quality of services was evaluated using proxy markers, specifically the  
31  
32 proportion of invalid specimens and number of unsuccessful colposcopy  
33  
34 procedures. Differences between the three study groups were assessed using  
35  
36 a chi-square test or a Wilcoxon rank-sum test, as appropriate. All data were  
37  
38 analysed using STATA version 13.0.  
39  
40  
41  
42  
43

#### 44 **Ethical considerations**

45  
46  
47  
48 Ethical approval was obtained from Human Research Ethics Committee of the  
49  
50 University of the Witwatersrand (Certificate number: M151184). Permission for  
51  
52 use of the CMJAH data was granted by the hospital's Chief Executive Officer,  
53  
54 and the head of the Department of Obstetrics and Gynaecology at CMJAH.  
55  
56  
57  
58  
59  
60

The NHLS Academic Affairs and Research Office gave permission for use of their data.

## Patient involvement

The study utilised data that had already been collected as part of routine patient care, and thus patients were not directly involved in the study. We did, however, attempt to contact patients who had abnormal lesions on histology and had not attended follow-up visits.

## RESULTS

### Access to colposcopy and timeliness of services

In total, 910 women accessed colposcopy at CMJAH between October 2012 and September 2014. In the subsequent two years, 1120 women had a colposcopy: 399 at HCHC (35.6%) and 721 at CMJAH (64.4%; Table 1 and Figure 1).

**Table 1:** Patient characteristics and colposcopy outcomes at a community clinic, and a tertiary-level facility before and after decentralisation

| Variables | Before versus after decentralisation at CMJAH |                                               |            | HCHC versus CMJAH after decentralisation |            |
|-----------|-----------------------------------------------|-----------------------------------------------|------------|------------------------------------------|------------|
|           | A) Pre-decentralisation (2012-2014)<br>N=910  | B) Post-decentralisation (2014-2016)<br>N=721 | P (A vs B) | C) Hillbrow CHC (2014-2016)<br>N=399     | P (B vs C) |
|           |                                               |                                               |            |                                          |            |

|                           |                                      |                   |                |         |                |        |
|---------------------------|--------------------------------------|-------------------|----------------|---------|----------------|--------|
| Characteristics           | <b>Age groups in years</b>           |                   |                |         |                |        |
|                           | <20                                  | 7 (0.8)           | 6 (0.8)        |         | 0 (0)          |        |
|                           | 20–34                                | 351 (39.8)        | 209 (30.2)     |         | 150 (37.6)     |        |
|                           | 35–44                                | 342 (38.8)        | 266 (38.4)     |         | 156 (39.1)     |        |
|                           | 45–59                                | 161 (18.3)        | 187 (27.0)     |         | 79 (19.8)      |        |
|                           | >60                                  | 20 (2.3)          | 25 (3.6)       | 0.001   | 7 (1.8)        | 0.003  |
|                           | <b>HIV status known</b>              | 650 (71.4)        | 429 (59.5)     | <0.001  | 399 (100)      | <0.001 |
|                           | <b>HIV status<sup>^</sup></b>        |                   |                |         |                |        |
|                           | Negative                             | 105 (16.2)        | 59 (13.8)      |         | 62 (15.5)      |        |
|                           | Positive                             | 545 (83.9)        | 370 (86.3)     | 0.28    | 337 (84.5)     | 0.47   |
|                           | <b>On ART<sup>%</sup></b>            | 428/544<br>(78.7) | 324/370 (87.6) | <0.001  | 336/337 (99.7) | <0.001 |
| Cervical cancer Screening | <b>Facility where Pap smear done</b> |                   |                |         |                |        |
|                           | CMJAH                                | 115 (12.8)        | 124 (17.5)     |         | 0 (0.0)        |        |
|                           | HCHC                                 | 114 (12.7)        | 43 (6.1)       |         | 307 (76.9)     |        |
|                           | Other clinic or hospital             | 671 (74.6)        | 540 (76.4)     | <0.001  | 92 (23.1)      | <0.001 |
|                           | <b>Pap smear results</b>             |                   |                |         |                |        |
|                           | NILM                                 | 6 (0.7)           | 8 (1.1)        |         | 17 (4.3)       |        |
|                           | LSIL                                 | 141 (15.5)        | 125 (17.4)     |         | 79 (20.0)      |        |
|                           | ASCUS                                | 19 (2.1)          | 34 (4.7)       |         | 4 (1.0)        |        |
|                           | HSIL                                 | 678 (74.7)        | 478 (66.4)     |         | 263 (66.4)     |        |
|                           | ASC-H                                | 63 (6.9)          | 65 (9.0)       |         | 27 (6.8)       |        |
| Carcinoma                 | 1 (0.1)                              | 10 (1.4)          | <0.001         | 6 (1.5) | <0.001         |        |
|                           | <b>Pap smear risk categories</b>     |                   |                |         |                |        |
|                           | NILM, LSIL or ACSUS                  | 166 (18.3)        | 167 (23.2)     |         | 100 (25.3)     |        |
|                           | HSIL, ASC-H or carcinoma             | 742 (81.7)        | 553 (76.8)     | 0.015   | 296 (74.8)     | 0.44   |
| Cervical cancer           | <b>Procedure during colposcopy</b>   |                   |                |         |                |        |
|                           | Visual inspection only               | 37 (4.1)          | 37 (5.2)       |         | 63 (15.9)      |        |
|                           | Lletz                                | 337 (37.2)        | 258 (35.9)     |         | 231 (58.2)     |        |
|                           | Biopsy                               | 526 (58.0)        | 420 (58.4)     |         | 90 (22.7)      |        |
|                           | Other                                | 7 (0.8)           | 4 (0.6)        | 0.69    | 13 (3.3)       | <0.001 |

|  | Histology result <sup>&amp;</sup> |            |            |      |           |        |
|--|-----------------------------------|------------|------------|------|-----------|--------|
|  | Normal                            | 27 (3.1)   | 30 (4.4)   |      | 45 (13.8) |        |
|  | CIN I                             | 254 (29.3) | 200 (29.3) |      | 84 (25.7) |        |
|  | CIN II                            | 298 (34.3) | 209 (30.7) |      | 99 (30.3) |        |
|  | CIN III                           | 236 (27.2) | 198 (29.0) |      | 86 (26.3) |        |
|  | Carcinoma                         | 3 (0.4)    | 9 (1.3)    |      | 2 (0.6)   |        |
|  | Other <sup>*</sup>                | 34 (3.9)   | 19 (2.8)   |      | 2 (0.6)   |        |
|  | Invalid specimen                  | 16 (1.8)   | 17 (2.5)   | 0.10 | 9 (2.8)   | <0.001 |

$\chi^2$  test for categorical variables or Wilcoxon Rank-sum test for continuous variables. <sup>^</sup>Of those with a known HIV status. <sup>%</sup>Of those HIV positive. <sup>&</sup>Of those with a histology specimen taken at biopsy, Lletz or other procedure. Charlotte Maxeke Johannesburg Academic Hospital (CMJAH). Hillbrow Community Health Centre (HCHC). <sup>\*</sup>Other includes infections such as cervicitis, inflammation and dysplasia

Of all Pap smears done in the JHD in the two years after decentralisation (114,983), 1.9% were done at HCHC (2227; Table 2). Overall, 18.0% of Pap smears done at HCHC had abnormal cytology and required colposcopy (n=401), compared to only 8.2% of other women in JHD as a whole (n=1826; p<0.001). The estimated colposcopy coverage among women who had an abnormal Pap smear at HCHC was 66.6% (267/401; 95%CI=61.7-71.2%). The number of women who had a Pap smear at HCHC and then a colposcopy at either facility was three-fold higher post-decentralisation than pre-decentralisation (from 113 to 350) (Table 1).

**Table 2:** Cytology results in the City of Johannesburg in 2014-2016

| Variable n (%)    | Johannesburg health district* (n=114,983) | Hillbrow Community Health Centre (n=2227) | P |
|-------------------|-------------------------------------------|-------------------------------------------|---|
| Pap smear results |                                           |                                           |   |

|                                    |                |             |        |
|------------------------------------|----------------|-------------|--------|
| NILM                               | 74,969 (65.2)  | 852 (38.3)  |        |
| LSIL                               | 23,212 (20.2)  | 790 (35.5)  |        |
| ASCUS                              | 7391 (6.4)     | 184 (8.3)   |        |
| HSIL                               | 7808 (6.8)     | 364 (16.3)  |        |
| ASC-H                              | 1221 (1.1)     | 28 (1.3)    |        |
| Carcinoma                          | 382 (0.3)      | 9 (0.4)     |        |
|                                    |                |             | <0.001 |
| <b>Number requiring colposcopy</b> |                |             |        |
| No (NILM, LSIL or ASCUS)           | 105,572 (91.8) | 9411 (82.0) |        |
| Yes (HSIL, ASC-H or carcinoma)     | 1826 (8.2)     | 401 (18.0)  | <0.001 |

Data from the National Health Laboratory Service. Excludes invalid or missing specimens, and other Pap smear results (n=2446).

\*District total excludes HCHC

Almost half of the women at CMJAH had a delay in receiving colposcopy (>6 months between Pap smear and colposcopy) post-decentralisation, compared to about a third pre-decentralisation (47.3% versus 36.2%,  $p<0.001$ ; Figure 1: Graph 1A). At HCHC, 21.7% of women had a colposcopy within three months of a Pap smear being taken (versus 11.8% at CMJAH pre- and 15.4% post-decentralisation,  $p<0.001$ ).

The absolute number of women at CMJAH who had had a Pap smear at HCHC decreased from 113 to 43 in the second period. One quarter of women who had a colposcopy at HCHC had had their Pap smear at another facility.

### Characteristics of women in the three groups and HIV service integration

1  
2  
3  
4 The proportion of women older than 45 years pre-decentralisation at CMJAH  
5  
6 was 20.6%, post-decentralisation at CMJAH 30.6% and at HCHC 21.9%  
7  
8 (p<0.001). At CMJAH, more women had a known HIV status pre-  
9  
10 decentralisation than post-decentralisation (71.4% versus 59.5%, p<0.001). All  
11  
12 women at HCHC had a documented HIV status. Around 85% of women with a  
13  
14 known HIV status were HIV positive in all three groups. The proportion of  
15  
16 positive women receiving ART rose in the second period at CMJAH from  
17  
18 78.7% to 87.6% (p<0.001), and almost all positive women were on ART at  
19  
20 HCHC (99.7%; p<0.001) (Table 1).  
21  
22  
23  
24  
25  
26  
27  
28  
29  
30  
31  
32  
33  
34  
35  
36  
37  
38  
39

#### 40 **Description of colposcopy procedures, histology findings and colposcopy** 41 **quality** 42 43 44

45  
46 At CMJAH, in both periods, nearly 60% of women had a biopsy at colposcopy  
47  
48 (58.2%), while the same proportion had a Lletz at HCHC (58.2%). Three  
49  
50 women who had a colposcopy at HCHC were referred to CMJAH due to an  
51  
52 unsuccessful procedure.  
53  
54  
55  
56  
57  
58  
59  
60

1  
2  
3  
4 Women at HCHC were 3.5 fold more likely to have a normal result on  
5  
6 histology than women at CMJAH (95%CI OR=2.1-5.7). Post-decentralisation,  
7  
8 29.0% of women at CMJAH and 26.3% at HCHC had CIN III lesions (p=0.37;  
9  
10 Figure 1; Graph1B). Post-decentralisation, 11 women had a diagnosis of  
11  
12 carcinoma on histology (1.1%), compared to 3 before decentralisation (0.4%;  
13  
14 p=0.06). The proportion of invalid specimens was similar across the three  
15  
16 groups, ranging from 1.8 to 2.8% (Table 1).  
17  
18  
19  
20  
21  
22

## 23 24 DISCUSSION

25  
26  
27 In this study we determined whether decentralisation to primary care level  
28  
29 improved access to colposcopy services by reviewing the number of women  
30  
31 attending the service before and after decentralisation, and the coverage of  
32  
33 colposcopy among women at HCHC. We found that the cumulative number of  
34  
35 colposcopies across the two facilities rose following decentralisation, and after  
36  
37 only two years, HCHC was responsible for a third of all colposcopies in the  
38  
39 sub-district, even though it performs a negligible number of Pap smears  
40  
41 relative to other sites. Overall, following decentralisation, three fold more  
42  
43 women who had a Pap smear at HCHC had a colposcopy, and equally, at  
44  
45 CMJAH, the proportion of women referred from HCHC reduced almost  
46  
47 threefold. The marked increase in number of women from HCHC who had a  
48  
49 colposcopy indicates that prior to decentralisation there may have been a  
50  
51  
52  
53  
54  
55  
56  
57  
58  
59  
60

1  
2  
3 large unmet need for the service, which was now being addressed, at least in  
4  
5  
6 part. The coverage reached 66.6%, considerably higher than figures in other  
7  
8  
9 settings.

10  
11  
12 Decentralisation of colposcopy services to primary level care has several  
13  
14  
15 potential benefits. Firstly, with adequate training, tasks that had been  
16  
17  
18 performed by highly specialised staff can be shifted to lower health worker  
19  
20  
21 cadres, allowing specialists to focus on more complex cases.[23] Additionally,  
22  
23  
24 decentralisation may alleviate patient barriers to access, by bringing services  
25  
26  
27 closer to them – in settings they are familiar with – and reducing their transport  
28  
29  
30 and other costs.[13, 23] Decentralisation has long been central to the  
31  
32  
33 provision of HIV services in this setting through, for example, task shifting,  
34  
35  
36 providing antiretroviral treatment in primary care services and the dispensing  
37  
38  
39 of drugs from local pharmacies, rather than clinics.[24]

40  
41  
42 Decentralisation of colposcopy can take several forms, including  
43  
44  
45 telecolposcopy from distant sites, outreach portable colposcopy, shifting of  
46  
47  
48 services to nurse practitioners or medical officers, and decentralisation to  
49  
50  
51 lower level facilities, as in this study.[25] In other settings, shifting services to  
52  
53  
54 lower care levels was found to be cost-effective, acceptable to patients and to  
55  
56  
57 increase rates of attendance for colposcopy.[16, 25, 26] In the Western Cape,  
58  
59  
60 South Africa, for example, colposcopy services were decentralised to a district



1  
2  
3  
4 hospital and provided by a gynaecologist.[23] This raised uptake of the service  
5  
6 and reduced time to procedure. In high-income countries, services have been  
7  
8 successfully decentralised to community health centres and portable outreach  
9  
10 programmes in Alaska, the United States, and parts of Canada and Australia,  
11  
12 targeting immigrant, Inuit and other vulnerable women.[16, 17, 26-28] The  
13  
14 National Health Service in United Kingdom has gone a step further and  
15  
16 colposcopy is often performed by nurse practitioners once they have  
17  
18 completed certification procedures.[29]

19  
20  
21  
22  
23  
24  
25  
26  
27 Women attending HCHC colposcopy were at lower risk than those at CMJAH,  
28  
29 as shown by their lower grades of abnormalities on Pap smear and histology.  
30  
31  
32 Women at HCHC were also younger than those at CMJAH, important as risk  
33  
34 for cervical cancer is higher in rises considerably with age (the mean age at  
35  
36 diagnosis of cervical cancer is 52.3 in South Africa).[30] These findings may  
37  
38 suggest that, as the programme had envisaged, higher-risk patients are being  
39  
40 referred to CMJAH. Overall, services at HCHC appear to be performing well,  
41  
42  
43 with all women tested for HIV and almost all those positive were receiving  
44  
45 ART. In addition, colposcopy services were now integrated into their care,  
46  
47 which was previously off-site, complex to access and marked by lengthy  
48  
49 delays. HIV-positive women made up the large majority of patients in all  
50  
51  
52  
53  
54  
55  
56  
57  
58 groups, reflecting the higher levels of risk for cervical cancer in this population.  
59  
60

1  
2  
3  
4 Clearly it remains a priority to integrate screening for cervical cancer within all  
5  
6  
7 clinics providing antiretroviral treatment. Equally, ART and services such as  
8  
9  
10 screening and treatment for sexually transmitted infections could be integrated  
11  
12  
13 within colposcopy clinics, reducing the opportunity costs associated with  
14  
15  
16 multiple visits to the clinic and lowering the risk of loss to follow up.

17  
18 The similar number of invalid histology samples and the isolated cases of  
19  
20  
21 failed colposcopy suggests that the quality of colposcopy services at HCHC  
22  
23  
24 may have been comparable to CMJAH. Unlike at CMJAH, however, Lletz was  
25  
26  
27 the commonest procedure at HCHC, in keeping with evidence that Lletz is  
28  
29  
30 better suited to lower level facilities and staff.[10] With decentralisation, it is  
31  
32  
33 critical to ensure that staff are adequately trained and service quality is closely  
34  
35  
36 monitored. The hesitancy to decentralise colposcopy to date, may reflect  
37  
38  
39 underlying concerns that cases of cancer may go undetected by lower-level  
40  
41  
42 staff. In some settings, lower-level health workers undergo a process of  
43  
44  
45 certification and have to perform a certain number of colposcopies per year to  
46  
47  
48 remain registered.[29] While this approach may hold advantages, onerous  
49  
50  
51 processes around certification and recertification may lead to staff  
52  
53  
54 discontinuing colposcopy.[31]

55  
56 The decline in number of colposcopies at CMJAH is concerning, and may  
57  
58  
59 reflect factors other than a reduction in demand that accompanies  
60

1  
2  
3 decentralisation. Fewer women at the site had a known HIV status and waiting  
4  
5  
6 times for colposcopy lengthened. Thus, though decentralisation can reduce  
7  
8  
9 the patient burden at referral centres, this does not necessarily translate into  
10  
11  
12 improved services at that site. Other factors may play a larger influence, for  
13  
14  
15 example, coinciding with the period after decentralisation, CMJAH lost a  
16  
17  
18 number of senior specialists.  
19

20  
21 Delays in colposcopy vary considerably between settings, from an average of  
22  
23  
24 39 days from referral to colposcopy in one study in KwaZulu Natal, South  
25  
26  
27 Africa,[12] to around 5-6 months in both our study and another in the Western  
28  
29  
30 Cape.[23] It is concerning that time from Pap smear to colposcopy is greater  
31  
32  
33 than six months for half the women at CMJAH, and a third at HCHC. Reducing  
34  
35  
36 these delays is clearly a priority at both sites. We were unable, however, to  
37  
38  
39 discern reasons for these delays, which could be caused by delays in  
40  
41  
42 providing the results of Pap smears to patients, patient delays in making or  
43  
44  
45 attending appointments, or shortages of specialist staff. We could also not  
46  
47  
48 investigate which group of patients required referral to higher levels of care,  
49  
50  
51 and future studies might attempt to define criteria for referral. Moreover, given  
52  
53  
54 the relatively short period of the review, we are unable to assess sustainability  
55  
56  
57 of the services in the long-run, a pressing question. Lastly, the study  
58  
59  
60 evaluated the use of colposcopy following cytological screening with Pap

1  
2  
3  
4 smears and these findings may not be generalizable to screening with HPV  
5  
6 testing.[29] HPV testing has a considerably higher sensitivity for detecting  
7  
8 precursor lesions of cervical cancer compared to cytology, and thus may alter  
9  
10 the number of patients requiring colposcopy and types of lesions  
11  
12  
13  
14  
15 identified.[32, 33]  
16

## 17 18 **CONCLUSION**

19  
20  
21 In conclusion, decentralisation of colposcopy services can improve access to  
22  
23 colposcopy, resulting in faster diagnoses of precancerous lesions of the  
24  
25 cervix, more lesions being treated with LLETZ and a reduction in the burden of  
26  
27 patients in tertiary hospitals. Most importantly, increasing the number of  
28  
29 colposcopies and treatments of precancerous lesions could reduce the  
30  
31 incidence of cervical cancer. This is particularly important among HIV-positive  
32  
33 women who now live longer with ART, and the treatment of their co-  
34  
35 morbidities is rapidly gaining in importance. Though coverage of colposcopy  
36  
37 reached two thirds at HCHC, it is important to identify interventions to further  
38  
39 raise coverage levels. Decentralisation is unlikely to affect the quality of  
40  
41 services if medical officers are appropriately trained, supervised and  
42  
43 supported by clear referral guidelines. The approach presented here could be  
44  
45 extended to other similar primary- or secondary-level facilities in South Africa,  
46  
47 and perhaps encompass the use of portable colposcopes or telecolposcopy,  
48  
49  
50  
51  
52  
53  
54  
55  
56  
57  
58  
59  
60

1  
2  
3  
4 under close supervision. If done correctly and at scale, decentralisation of  
5  
6 colposcopy services, could shore up cervical cancer prevention and finally  
7  
8 decrease the public health burden and mortality due to the cancer.  
9  
10  
11  
12  
13  
14  
15

## 16 **ACKNOWLEDGEMENTS**

17  
18  
19 We would like to acknowledge the following persons who contributed to this  
20  
21  
22 study:  
23  
24  
25

26 H. Manyonga, Z. Dumakude, A. Moholola, N. Wattrus, L. Mbuyisa, I. Sishi, N.  
27  
28 Twala, S. Sidabuka, E. Briedenhann, L. Mavuya, K. Moshaba, S. Mzobe, S.  
29  
30 Carmona (NHLS), L. Chauke (Department of Obstetrics and Gynaecology,  
31  
32 CMJAH).  
33  
34  
35  
36  
37  
38  
39  
40  
41  
42  
43  
44  
45  
46  
47

## 48 **FUNDING**

49  
50  
51 This study has been made possible through funding from USAID-PEPFAR,  
52  
53  
54 grant number: AID-A-12-67400021. We would also like to acknowledge the  
55  
56  
57  
58  
59  
60

1  
2  
3 following organizations for donating a colposcopy machine to Hillbrow CHC:  
4  
5

6 Vodacom, Altech and Altron.  
7  
8  
9

## 10 11 12 13 **COMPETING INTERESTS**

14  
15  
16  
17 All authors listed in this study do not have competing interests to declare.  
18  
19

## 20 21 22 23 **DATA SHARING STATEMENT**

24  
25  
26  
27 There's no additional unpublished data from the study.  
28  
29

## 30 31 32 33 **AUTHOR CONTRIBUTIONS**

34  
35 **Manuscript title:** The impact of decentralising colposcopy services from  
36 tertiary- to primary-level care in inner-city Johannesburg, South Africa: a  
37 before and after study  
38  
39

### 40 41 42 **Category 1**

43  
44 **Conception and design of study:** G. Maimela\*1, X. Nene\*1, S. Sawry, N.  
45 Mvundla, M. Chersich  
46  
47

48  
49 **Acquisition of data:** G. Maimela, X. Nene, N. Mvundla,  
50  
51

52  
53 **Analysis and/or interpretation of data:** G. Maimela, X. Nene, S. Sawry, E.  
54 Kachingwe, M. Chersich, H. Rees; T. Smith.  
55  
56

### 57 58 59 **Category 2** 60

1  
2  
3  
4 **Drafting the manuscript:** G. Maimela, X. Nene, N. Mvundla, S. Sawry, E.  
5  
6 Kachingwe, M. Chersich.

7  
8 **Revising the manuscript critically for important intellectual content:** M.  
9  
10 Chersich, H. Rees, T. Smith

### 11 12 13 **Category 3**

14  
15  
16 **Approval of the version of the manuscript to be published:**

17  
18  
19 G. Maimela\*<sup>1</sup>, X. Nene\*<sup>1</sup>, N. Mvundla<sup>1</sup>, S. Sawry<sup>1</sup>, T. Smith<sup>2</sup>, H. Rees<sup>1</sup>,  
20  
21 E.Kachingwe<sup>1</sup>, M. Chersich<sup>1</sup>

22  
23  
24  
25  
26  
27  
28 **ACKNOWLEDGEMENTS:** *All persons who have made substantial*  
29  
30 *contributions to the work reported in the manuscript (e.g., technical help,*  
31  
32 *writing and editing assistance, general support), but who do not meet the*  
33  
34 *criteria for authorship, are named in the Acknowledgements and have given*  
35  
36 *us their written permission to be named. If we have not included an*  
37  
38 *Acknowledgements, then that indicates that we have not received substantial*  
39  
40 *contributions from non-authors.*

41  
42  
43 H. Manyonga, Z. Dumakude, A. Moholola, N. Wattrus, L. Mbuyisa, I. Sishi, N.  
44  
45 Twala, S. Sidabuka, E. Briedenhann, L. Mavuya, K. Moshaba, S. Mzobe, S.  
46  
47 Carmona (NHLS), L. Chauke (Department of Obstetrics and Gynaecology,  
48  
49 CMJAH).

50  
51  
52  
53 This statement is signed by all the authors (a photocopy of this form may be  
54  
55 used if there are more than 10 authors):

### 56 57 58 **REFERENCES**

1. WHO. Cervical Cancer: An NCD We Can Overcome: Call to Action. 2018.  
[http://www.who.int/reproductivehealth/DG\\_Call-to-Action.pdf](http://www.who.int/reproductivehealth/DG_Call-to-Action.pdf).
2. Bruni L, Barrionuevo-Rosas L, Albero G, Serrano B, Mena M, Gómez D, et al. ICO/IARC Information Centre on HPV and Cancer (HPV Information Centre). Human Papillomavirus and Related Diseases in the World. . Summary Report 27 July 2017.  
<http://www.hpvcentre.net/statistics/reports/XWX.pdf>.
3. Batra P, Kuhn L, Denny L. Utilisation and outcomes of cervical cancer prevention services among HIV-infected women in Cape Town. SAMJ: South African Medical Journal. 2010;100:39-44.
4. ICO/IARC Information Centre on HPV and Cancer. South Africa Human Papillomavirus and Related Cancers, Fact Sheet 2017. 2017.  
[http://www.hpvcentre.net/statistics/reports/ZAF\\_FS.pdf](http://www.hpvcentre.net/statistics/reports/ZAF_FS.pdf).
5. Shisana O, Rehle T, Simbayi LC, Zuma K, Jooste S, Zungu N, et al. South African National HIV Prevalence, Incidence and Behaviour Survey, 2012. Cape Town: HSRC Press; 2014.
6. Adler D, Wallace M, Bennie T, Abar B, Sadeghi R, Meiring T, et al. High risk human papillomavirus persistence among HIV-infected young women in South Africa. International journal of infectious diseases : IJID : official publication of the International Society for Infectious Diseases. 2015;33:219-21.
7. Guiguet M, Boue F, Cadranel J, Lang JM, Rosenthal E, Costagliola D, et al. Effect of immunodeficiency, HIV viral load, and antiretroviral therapy on the risk of individual malignancies (FHDH-ANRS CO4): a prospective cohort study. Lancet Oncol. 2009;10(12):1152-9.
8. National Department of Health South Africa. Cervical Cancer Prevention and Control Policy. 2017.
9. Day C, Gray A, Ndlovu N. South African Health Review 2018. Durban: Health Systems Trust. 2018.
10. WHO. WHO guidelines for screening and treatment of precancerous lesions for cervical cancer prevention.



[http://apps.who.int/iris/bitstream/handle/10665/94830/9789241548694\\_eng.pdf;jsessionid=F65ED4960A15E4D16BB15F6E57F71518?sequence=1](http://apps.who.int/iris/bitstream/handle/10665/94830/9789241548694_eng.pdf;jsessionid=F65ED4960A15E4D16BB15F6E57F71518?sequence=1); 2013.

11. Denny L, Kuhn L. Cervical cancer prevention and early detection from a South African perspective. Chapter 18. South African Health Review Published by Health Systems Trust. 2017.
12. Katz IT, Butler LM, Crankshaw TL, Wright AA, Bramhill K, Leone DA, et al. Cervical Abnormalities in South African Women Living With HIV With High Screening and Referral Rates. *J Glob Oncol*. 2016;2(6):375-80.
13. Dawood S. Barriers and Facilitators to Colposcopy Attendance. Following an Abnormal Pap Smear: Patient and Provider Perspectives. Cape Town: University of Cape Town; 2014.
14. Momberg M, Botha MH, Van der Merwe FH, Moodley J. Women's experiences with cervical cancer screening in a colposcopy referral clinic in Cape Town, South Africa: a qualitative analysis. *BMJ open*. 2017;7(2):e013914.
15. Hoque M, Hoque E, Kader SB. Evaluation of cervical cancer screening program at a rural community of South Africa. *East African journal of public health*. 2008;5(2):111-6.
16. Martin B, Smith W, Orr P, Guijon F. Investigation and management of cervical intraepithelial neoplasia in Canadian Inuit: enhancing access to care. *Arctic Med Res*. 1995;54 Suppl 1:117-21.
17. Payne S, Jarrett N, Jeffs D. The impact of travel on cancer patients' experiences of treatment: a literature review. *Eur J Cancer Care (Engl)*. 2000;9(4):197-203.
18. Baranoski AS, Stier EA. Factors associated with time to colposcopy after abnormal Pap testing in HIV-infected women. *Journal of women's health (2002)*. 2012;21(4):418-24.
19. Rees H, Delany-Moretlwe S, Scorgie F, Luchters S, Chersich MF. At the Heart of the Problem: Health in Johannesburg's Inner-City. *BMC Public Health*. 2017;17(Suppl 3):554.

- 1  
2  
3  
4 20. Stadler J, Chikandiwe A, Mayaud P, Rees H, Imrie J, Delany-Moretlwe S.  
5 Biographies of HIV and Cervical Cancer: Understanding Treatment-Seeking  
6 Amongst HIV Positive Women in Inner City Johannesburg. IAS conference, Durba,  
7 South Africa, Oral presentation. 2016.
- 8  
9  
10  
11 21. Botha MH. Guidelines for cervical cancer screening in South Africa. Southern  
12 African Journal of Gynaecological Oncology 2017;9(1):8-12.
- 13  
14  
15 22. Harris PA, Taylor R, Thielke R, Payne J, Gonzalez N, Conde JG. Research  
16 electronic data capture (REDCap)--a metadata-driven methodology and workflow  
17 process for providing translational research informatics support. J Biomed Inform.  
18 2009;42(2):377-81.
- 19  
20  
21  
22 23. Blanckenberg ND, Oettle CA, Conradie HH, Krige FK. Impact of introduction  
23 of a colposcopy service in a rural South African sub-district on uptake of colposcopy.  
24 South African Journal of Obstetrics and Gynaecology. 2013;19(3).
- 25  
26  
27  
28 24. Callaghan M, Ford N, Schneider H. A systematic review of task- shifting for  
29 HIV treatment and care in Africa. Human resources for health. 2010;8:8.
- 30  
31  
32  
33 25. Bishai DM, Ferris DG, Litaker MS. What is the least costly strategy to evaluate  
34 cervical abnormalities in rural women? Comparing telemedicine, local practitioners,  
35 and expert physicians. Med Decis Making. 2003;23(6):463-70.
- 36  
37  
38  
39 26. Ogilvie GS, Shaw EA, Lusk SP, Zazulak J, Kaczorowski JA. Access to  
40 colposcopy services for high-risk Canadian women: can we do better? Can J Public  
41 Health. 2004;95(5):346-51.
- 42  
43  
44  
45 27. Gifford MS, Stone IK. Quality, access, and clinical issues in a nurse  
46 practitioner colposcopy outreach program. The Nurse practitioner. 1993;18(10):25-9,  
47 33-6.
- 48  
49  
50  
51 28. Hartz LE. Quality of care by nurse practitioners delivering colposcopy  
52 services. J Am Acad Nurse Pract. 1995;7(1):23-7.
- 53  
54  
55  
56 29. Public Health England, National Health Service. NHS Cervical Screening  
57 Programme Colposcopy and Programme Management. NHSCSP Publication  
58 number 20. Third edition. 2016.
- 59  
60

1  
2  
3  
4 [https://assets.publishing.service.gov.uk/government/uploads/system/uploads/attach](https://assets.publishing.service.gov.uk/government/uploads/system/uploads/attachment_data/file/515817/NHSCSP_colposcopy_management.pdf)  
5 [ment\\_data/file/515817/NHSCSP\\_colposcopy\\_management.pdf](https://assets.publishing.service.gov.uk/government/uploads/system/uploads/attachment_data/file/515817/NHSCSP_colposcopy_management.pdf).

- 6  
7 30. Olorunfemi G, Ndlovu N, Masukume G, Chikandiwa A, Pisa PT, Singh E.  
8 Temporal trends in the epidemiology of cervical cancer in South Africa (1994-2012).  
9 Int J Cancer. 2018;143(9):2238-49.  
10  
11 31. Sonnex C. Providing a genitourinary medicine colposcopy service. Sexually  
12 transmitted infections. 2014;90(1):8-10.  
13  
14 32. Dijkstra MG, Snijders PJ, Arbyn M, Rijkaart DC, Berkhof J, Meijer CJ. Cervical  
15 cancer screening: on the way to a shift from cytology to full molecular screening. Ann  
16 Oncol. 2014;25(5):927-35.  
17  
18 33. Wright TC, Jr., Stoler MH, Behrens CM, Sharma A, Sharma K, Apple R.  
19 Interlaboratory variation in the performance of liquid-based cytology: insights from  
20 the ATHENA trial. Int J Cancer. 2014;134(8):1835-43.  
21  
22  
23  
24  
25  
26  
27  
28  
29  
30  
31  
32  
33  
34  
35  
36  
37  
38  
39  
40  
41  
42  
43  
44  
45  
46  
47  
48  
49  
50  
51  
52  
53  
54  
55  
56  
57  
58  
59  
60

1  
2  
3  
4  
5  
6  
7  
8  
9  
10  
11  
12  
13  
14  
15  
16  
17  
18  
19  
20  
21  
22  
23  
24  
25  
26  
27  
28  
29  
30  
31  
32  
33  
34  
35  
36  
37  
38  
39  
40  
41  
42  
43  
44  
45  
46  
47  
48  
49  
50  
51  
52  
53  
54  
55  
56  
57  
58  
59  
60

## FIGURE LEGENDS

Figure 1:

Graph 1A: Total number of colposcopies done before and after  
decentralisation

Graph 1B: Number of cervical intraepithelial neoplasia lesions detected before  
and after decentralisation

1  
2  
3  
4  
5  
6  
7  
8  
9  
10  
11  
12  
13  
14  
15  
16  
17  
18  
19  
20  
21  
22  
23  
24  
25  
26  
27  
28  
29  
30  
31  
32  
33  
34  
35  
36  
37  
38  
39  
40  
41  
42  
43  
44  
45  
46  
47  
48  
49  
50  
51  
52  
53  
54  
55  
56  
57  
58  
59  
60



Figure 1:  
Graph 1A: Total number of colposcopies done before and after decentralisation  
Graph 1B: Number of cervical intraepithelial neoplasia lesions detected before and after decentralisation

271x128mm (120 x 120 DPI)
